# Supplementary material
Source: Research Square preprint supplement (doi:10.21203/rs.3.rs-8873105/v1)
Supplement: Supplementary file 1 [file 01030240db6a31c11b0642e9.xlsx]

## Sheet: ST11
Supplemental Table 11. Associations of vitamin D levels with suicide outcomes for MHQ1 participants without symptoms of major mental illnesses.
	Passive suicidal ideation						Self-harm ideation						Self-harm behaviour						Suicide attempt
	Basic			Expanded			Basic			Expanded			Basic			Expanded			Basic			Expanded
	RRR	95% CI	P	RRR	95% CI	P	RRR	95% CI	P	RRR	95% CI	P	RRR	95% CI	P	RRR	95% CI	P	RRR	95% CI	P	RRR	95% CI	P
Serum vitamin D status (default: Optimal)
Deficiency	1.28235	[1.21 1.36]	8.22296e-18	1.21598	[1.13 1.31]	3.37806e-07	1.35333	[1.25 1.46]	5.05144e-14	1.22961	[1.11 1.36]	9.74832e-05	1.24567	[1.05 1.48]	0.0113691	1.14602	[0.92 1.42]	0.21434	1.30089	[1.06 1.59]	0.011325	1.07105	[0.82 1.39]	0.606884
Insufficiency	1.1181	[1.08 1.16]	5.6032e-09	1.09839	[1.05 1.15]	0.000126374	1.14616	[1.09 1.21]	6.69594e-07	1.12818	[1.05 1.21]	0.000461009	1.09221	[0.97 1.23]	0.140975	1.02781	[0.89 1.19]	0.710119	1.27239	[1.11 1.46]	0.000546285	1.25306	[1.06 1.48]	0.0085406
Sex (default: Female)
Male	0.78518	[0.76 0.81]	3.66723e-41	0.862043	[0.82 0.90]	2.29803e-10	0.732118	[0.70 0.77]	1.55845e-33	0.766139	[0.72 0.82]	8.65009e-16	0.551812	[0.49 0.62]	3.06772e-24	0.596373	[0.52 0.69]	1.51887e-12	0.562948	[0.49 0.64]	1.94745e-17	0.584877	[0.50 0.69]	2.43977e-10
Age	0.980846	[0.98 0.98]	1.67897e-62	0.990326	[0.99 0.99]	4.87993e-07	0.958354	[0.96 0.96]	2.69608e-150	0.970379	[0.97 0.98]	1.91076e-29	0.925742	[0.92 0.93]	2.36386e-102	0.946523	[0.94 0.96]	2.05368e-22	0.957593	[0.95 0.97]	9.39474e-26	0.97536	[0.96 0.99]	0.000149406
Ethnicity (default: White European)
South Asian	0.854143	[0.69 1.05]	0.134778	0.735187	[0.57 0.96]	0.0214128	0.644312	[0.47 0.89]	0.00668362	0.430606	[0.28 0.65]	7.11713e-05	0.88254	[0.49 1.58]	0.674233	0.649556	[0.33 1.29]	0.219697	1.39234	[0.78 2.50]	0.266929	0.850158	[0.41 1.78]	0.666456
African Caribbean	0.698607	[0.57 0.86]	0.00091213	0.53194	[0.40 0.70]	8.69302e-06	0.626874	[0.47 0.84]	0.00203523	0.386064	[0.26 0.56]	9.66426e-07	0.450952	[0.22 0.91]	0.026401	0.184528	[0.07 0.50]	0.000991835	1.38113	[0.82 2.33]	0.224807	0.61336	[0.33 1.14]	0.123725
Chinese	0.592807	[0.40 0.87]	0.00826234	0.415999	[0.24 0.72]	0.00169731	0.525951	[0.30 0.92]	0.0248897	0.189022	[0.07 0.52]	0.0012296	0.36143	[0.09 1.46]	0.152898	0.182298	[0.02 1.33]	0.0932144	4.01335e-07	[0.00 .]	0.98572	5.16871e-07	[0.00 .]	0.984652
Mixed or other	1.09944	[0.94 1.28]	0.221474	1.09009	[0.90 1.32]	0.375321	1.07391	[0.87 1.32]	0.498496	0.803074	[0.61 1.05]	0.109993	1.34423	[0.92 1.96]	0.12476	0.920056	[0.57 1.49]	0.734227	1.65843	[1.09 2.53]	0.0188834	0.992553	[0.59 1.68]	0.977721
Assessment centre region (default: South England/London)
Midlands/Wales				0.934375	[0.87 1.00]	0.0471178				1.02283	[0.93 1.12]	0.633392				1.00355	[0.82 1.22]	0.971932				1.15996	[0.92 1.46]	0.200848
North England				0.847332	[0.81 0.89]	5.14002e-11				0.890486	[0.83 0.95]	0.00106609				0.829874	[0.71 0.96]	0.0144153				0.995258	[0.84 1.18]	0.95725
Scotland				0.852337	[0.78 0.93]	0.000417845				0.821689	[0.72 0.93]	0.00247718				0.816075	[0.63 1.06]	0.132898				0.948416	[0.69 1.30]	0.742594
Season of blood sample taken (default: Summer)
Spring				0.955711	[0.90 1.01]	0.138913				0.958703	[0.88 1.04]	0.326156				1.06916	[0.89 1.28]	0.468916				1.13821	[0.93 1.40]	0.21757
Autumn				0.974366	[0.92 1.03]	0.395437				0.994467	[0.91 1.08]	0.896826				1.03926	[0.87 1.25]	0.677146				1.02046	[0.82 1.26]	0.852115
Winter				0.920026	[0.86 0.98]	0.0136197				0.908184	[0.83 1.00]	0.0434045				1.05266	[0.86 1.28]	0.613437				0.949337	[0.75 1.20]	0.664769
BMI				0.998333	[0.99 1.00]	0.516644				1.00146	[0.99 1.01]	0.678925				0.993766	[0.98 1.01]	0.407229				1.00954	[0.99 1.03]	0.237675
Physical activity (default: None)
Low				0.92193	[0.75 1.13]	0.440512				0.743895	[0.57 0.97]	0.0261937				0.777784	[0.41 1.46]	0.436154				0.534636	[0.32 0.90]	0.018939
Moderate				0.868215	[0.71 1.06]	0.170024				0.677861	[0.53 0.87]	0.002663				0.957623	[0.52 1.77]	0.889809				0.452438	[0.27 0.75]	0.00195237
High				0.841275	[0.69 1.03]	0.0949765				0.687345	[0.53 0.89]	0.00397085				0.999686	[0.54 1.85]	0.999203				0.501216	[0.30 0.83]	0.00720835
Townsend deprivation index (default: 1 [most deprived])
2				0.892349	[0.83 0.96]	0.0010757				0.860687	[0.78 0.94]	0.00147475				0.865077	[0.71 1.05]	0.144886				0.752958	[0.61 0.93]	0.0097414
3				0.817698	[0.76 0.88]	1.77826e-08				0.735263	[0.67 0.81]	5.39584e-10				0.897948	[0.74 1.10]	0.288113				0.599671	[0.47 0.76]	1.76292e-05
4				0.805697	[0.75 0.86]	1.66202e-09				0.703947	[0.64 0.78]	2.66283e-12				0.741526	[0.60 0.91]	0.00526787				0.504395	[0.39 0.65]	5.72442e-08
5				0.753185	[0.70 0.81]	2.90385e-15				0.729198	[0.66 0.80]	1.54425e-10				0.690278	[0.56 0.85]	0.000593146				0.433594	[0.33 0.56]	2.25145e-10
Housing tenure (default: Own outright)
Rent/mortgage payment				1.04854	[1.00 1.10]	0.0696363				1.053	[0.98 1.13]	0.156056				1.11054	[0.95 1.29]	0.177441				1.15717	[0.97 1.39]	0.114154
Rent from local authority				1.08298	[0.91 1.29]	0.361074				1.15032	[0.92 1.43]	0.210864				1.77099	[1.19 2.63]					2.56721	[1.82 3.63]	9.06349e-08
Live in accomodation rent-free				1.26603	[0.99 1.63]	0.0641689				0.88028	[0.60 1.29]	0.515957				0.984849	[0.46 2.13]	0.969066				0.931053	[0.37 2.32]	0.878277
None of the options				1.22963	[0.85 1.79]	0.27941				1.04707	[0.62 1.77]	0.86363				1.81671	[0.78 4.25]	0.168338				2.69449	[1.21 6.02]	0.0156759
Population density (default:Urban)
Rural				0.993115	[0.92 1.07]	0.863256				0.996413	[0.89 1.12]	0.950092				0.821622	[0.63 1.07]	0.141173				1.18004	[0.89 1.57]	0.253494
Highest level of education attained (defauult: College or University degree)
A levels/AS levels or equivalent				0.935555	[0.87 1.01]	0.0929587				0.805477	[0.72 0.90]	0.000140023				0.898817	[0.72 1.12]	0.340239				1.09532	[0.84 1.42]	0.497364
O levels/GCSEs or equivalent				0.818937	[0.77 0.87]	6.89112e-10				0.7233	[0.66 0.79]	3.15546e-12				0.644753	[0.53 0.79]	1.73381e-05				1.05829	[0.86 1.31]	0.597822
CSEs or equivalent				0.780014	[0.69 0.88]	7.07848e-05				0.634276	[0.53 0.76]	3.06826e-07				0.523842	[0.36 0.76]	0.000755704				0.683355	[0.45 1.03]	0.0670591
NVQ or HND or HNC or equivalent				0.745499	[0.67 0.83]	1.46473e-07				0.712384	[0.61 0.83]	1.6923e-05				0.393724	[0.25 0.61]	3.85284e-05				0.660654	[0.44 0.99]	0.0456362
Other professional qualifications eg: nursing, teaching				0.887501	[0.83 0.95]	0.000226713				0.777692	[0.71 0.85]	7.69346e-08				0.704471	[0.57 0.86]	0.000789588				1.08681	[0.88 1.35]	0.450287
Employment status (default: Employed/student)
Retired				1.00209	[0.94 1.06]	0.945903				1.02416	[0.94 1.12]	0.591889				0.927945	[0.76 1.13]	0.465629				1.09408	[0.88 1.36]	0.423808
Unemployed for various reasons				1.09726	[1.00 1.20]	0.0439554				1.04999	[0.93 1.19]	0.436627				1.25256	[1.00 1.56]	0.0467882				1.21858	[0.92 1.61]	0.160635
Other				1.01619	[0.94 1.10]	0.694815				1.14828	[1.03 1.27]	0.00927708				0.983678	[0.79 1.23]	0.884837				1.27308	[1.00 1.61]	0.0458616
Sexually abused as a child (default: No)
Rarely/Sometimes				1.40182	[1.30 1.52]	4.97869e-17				1.90836	[1.73 2.10]	2.15691e-39				2.36944	[1.98 2.84]	1.35636e-20				2.06817	[1.67 2.56]	1.98657e-11
Often/Very often				1.39895	[1.07 1.83]	0.0147156				2.27794	[1.71 3.04]	1.98985e-08				2.39573	[1.43 4.01]	0.000890348				2.81621	[1.76 4.51]	1.60997e-05
Physically abused as a child (default: No)
Rarely/Sometimes				1.23156	[1.16 1.31]	3.04717e-12				1.4742	[1.37 1.59]	2.3935e-23				1.48056	[1.26 1.73]	1.04836e-06				1.89637	[1.59 2.26]	1.40995e-12
Often/Very often				1.37376	[1.11 1.71]	0.00423469				1.51198	[1.17 1.95]	0.00141238				1.35171	[0.84 2.18]	0.218049				2.70621	[1.81 4.04]	1.0769e-06
Emotionally abused as a child (default: No)
Rarely/Sometimes				1.80492	[1.69 1.93]	6.46434e-72				2.10491	[1.94 2.29]	1.62841e-69				2.55437	[2.17 3.00]	4.00703e-30				2.76535	[2.30 3.33]	6.09351e-27
Often/Very often				2.42028	[2.06 2.84]	1.37029e-27				3.57321	[2.99 4.27]	1.71205e-44				4.22626	[3.08 5.80]	5.32268e-19				5.33468	[3.89 7.31]	1.91164e-25
Adopted as a child (default: No)
Yes				1.08483	[0.90 1.31]	0.399794				1.22679	[0.96 1.57]	0.101925				1.50793	[0.95 2.39]	0.0798743				1.40957	[0.82 2.41]	0.2093
Risk taking behaviour (default: No)
Yes				1.14889	[1.09 1.21]	2.79651e-08				1.3681	[1.28 1.46]	2.26471e-20				1.31185	[1.14 1.51]	0.00017832				1.64142	[1.40 1.93]	1.36553e-09
Neuroticism				1.20785	[1.20 1.22]	0				1.21	[1.20 1.22]	0				1.21249	[1.19 1.24]	2.21231e-73				1.2249	[1.20 1.25]	5.5884e-61
Family/friend visits (default: Never/no friends outside household)
Few times a year				0.888926	[0.73 1.09]	0.248802				0.733492	[0.57 0.94]	0.0134145				0.908785	[0.54 1.54]	0.721813				0.602126	[0.37 0.97]	0.0378874
Few times a week				0.856136	[0.70 1.04]	0.12383				0.642791	[0.50 0.82]	0.000357424				0.706835	[0.42 1.19]	0.192867				0.530401	[0.33 0.85]	0.00816609
Almost daily				0.873037	[0.71 1.08]	0.205437				0.646491	[0.50 0.84]	0.00117772				0.597869	[0.34 1.07]	0.0816483				0.539188	[0.32 0.92]	0.0222675
Able to confide (default: Never)
Few times a year				0.886939	[0.81 0.97]	0.00596594				0.795431	[0.70 0.90]	0.000216702				0.805994	[0.63 1.03]	0.0903948				0.639732	[0.48 0.85]	0.00186396
Few times a week				0.841092	[0.78 0.91]	5.18375e-06				0.84512	[0.76 0.94]	0.00134075				0.74288	[0.60 0.92]	0.00744109				0.666488	[0.53 0.84]	0.000749819
Almost daily				0.68526	[0.64 0.73]	2.72679e-29				0.678028	[0.62 0.74]	1.23784e-16				0.613389	[0.50 0.75]	1.00554e-06				0.507161	[0.41 0.63]	3.31622e-10
Pain at any site longer than 3 months (default: No)
Yes				1.09536	[1.04 1.15]					1.14773	[1.07 1.23]	4.77031e-05				1.12854	[0.98 1.30]	0.0941755				1.332	[1.14 1.56]	0.000392375
Intercept	0.660017	[0.57 0.77]	4.44654e-08	0.333755	[0.22 0.50]	7.4845e-08	1.30036	[1.06 1.60]	0.01206	0.769408	[0.46 1.30]	0.326784	2.42416	[1.57 3.75]	6.7956e-05	0.61387	[0.20 1.93]	0.404093	0.204854	[0.12 0.34]	1.96298e-09	0.0835818	[0.03 0.27]	3.57247e-05
Abbreviations: MHQ1: ‘Thoughts and Feelings’ (Mental Health Questionnaire 1; 2016); RRR: relative risk ratio; CI: confidence interval
Note: Statistical significance at p<.0125; Nbasic = 105,720; Nexpanded = 77,755

## Sheet: metrics
Number of observations	105720		77755
AIC	156597		106096
BIC	156941		108022
** p<.0025, * p<.0125
