# Supplementary material
Source: Research Square preprint supplement (doi:10.21203/rs.3.rs-8873105/v1)
Supplement: Supplementary file 2 [file 033136825dd7d656350e637e.xlsx]

## Sheet: ST1
Supplemental Table 1. Field IDs used for definition and derivation of the variables used in the study.
Variable	Description	Categories from raw data	Categories used in the study	Field ID
Suicide outcomes	Lifetime occurrence of suicidal ideation and behaviour. Derived from several fields from the mental health questionnaires. Adapted from Strawbridge et al. (2019)1	Ever thought life was not living ("Many people have thoughts that life is not worth living. Have you felt that way?"); No/Yes/Yes, more than once/Prefer not to answer	Passive suicidal ideation; Yes/No	20479, 29108
		Ever contemplated self-harm ("Have you ever contemplated harming yourself (for example by cutting, biting, hitting yourself or taking an overdose?"); No/Yes/Yes, more than once/Prefer not to answer	Self-harm ideation; Yes/No	20485, 29109
		Ever self-harmed ("Have you deliberately harmed yourself, whether or not you meant to end your life?"); No/Yes/Prefer not to answer	Self-harm behaviour; Yes/No	20480, 29111
		Ever attempted suicide ("Have you harmed yourself with the intention of ending your life?"); No/Yes/Prefer not to answer	Suicide attempt; Yes/No	20483, 29116
		Underlying (primary) cause of death: ICD10	Suicide death (ICD-10 codes X60-X84 and Y870); Yes/No	40001
Vitamin D serum status	Derived from 25(OH)D levels	Continuous, nmol/L	Deficient (<25 nmol/L, including below detectable levels [<10 nmol/L])	30890, 30896
			Insufficient (25-50 nmol/L)
			Optimal (50-125 nmol/L)
Natural logarithm of vitamin D serum level	Derived from 25(OH)D levels	Continuous, nmol/L	Log(25[OH]D)	30890
Date of death	Used to derive suicide deaths past the completion of MHQ1 and MHQ2	Date	Date	40000
Date of MHQ1 completion	Used to derive age, highest education attained, employment, and death by suicide past completion	Date	Date	20400
Date of MHQ2 completion	Used to derive age, highest education attained, employment, and death by suicide past completion	Date	Date	29197
Age MHQ1	Age at the completion of MHQ1	Year of birth, integer	Integer	34, 20400
Age MHQ2	Age at the completion of MHQ2	Year of birth, integer	Integer	34, 29197
Genetically matched sex	Matched self-reported and genetic sex	Sex, 0/1	Sex, Female/Male	31, 22001
Geographic region	Derived from assessment centre location and corresponding latitudes	Separate category for each assessment centre	South England/London (<52°)	54
			Midlands/Wales (52-53.1°)
			North England (53.1-55.1°)
			Scotland (>55.1°)
BMI	Body mass index of the participant.	Continous	Continous	21001
Physical activity	Participants' MET (metabolic equivalent of a task) scores per week based on the International Physical Activity Questionnaire (IPAQ).	Continuous	Physical activity; none/low (<600 MET minutes/week)/moderate (600-3000 MET minutes/week)/high (>3000 MET minutes/week)	22040
Townsend deprivation index	Quintiles, 1 being the most deprived.	Continous	Quintiles	22189
Education MHQ1	Highest education level attained before the completion of MHQ1	Which of the following education do you have?; College or University degree / Alevels/AS levels or equivalent / O levels/GCSEs or equivalent / CSEs or equivalent / NVQ or HND or HNC or equivalent / Other professional qualifications eg: nursing, teaching / None of the above / Prefer not to answer	Education, College or University degree / Alevels/AS levels or equivalent / O levels/GCSEs or equivalent / CSEs or equivalent / NVQ or HND or HNC or equivalent / Other professional qualifications eg: nursing, teaching	6138, 20400
Education MHQ1	Highest education level attained before the completion of MHQ2	Which of the following education do you have?; College or University degree / Alevels/AS levels or equivalent / O levels/GCSEs or equivalent / CSEs or equivalent / NVQ or HND or HNC or equivalent / Other professional qualifications eg: nursing, teaching / None of the above / Prefer not to answer	Education, College or University degree / Alevels/AS levels or equivalent / O levels/GCSEs or equivalent / CSEs or equivalent / NVQ or HND or HNC or equivalent / Other professional qualifications eg: nursing, teaching	6138, 29197
Housing tenure	Own or rent the accomodation lived in	Do you own or rent the accomodation that you live in? Own outright/Own with a mortgage/Rent from local authority, local council, housing association/Re from private landlord or letting agency/Shared ownership/Live in accomodation rent free/None of the above/Prefer not to answer	Ownership, Own outright / Rent/mortgage payment / Rent from local authority / Live in accomodation rent-free / None of the options	680
Population density	Home area population density - urban or rural	Matched grid coordinates to separate density categories for England/Wales and Scotland	Population density, Urban/Rural	20118
Adoption	Adopted as a child	Were you adopted as a child? Yes/No/Do not know/Prefer not to answer	Adoption, Yes/No	1767
Sexual abuse as a child MHQ1	Sexually molested as a child, MHQ1	When I was growing up… Someone molested me (sexually) Never true/Rarely True/Sometimes true/Often/Very often true/Prefer not to answer	Sexually abused as a child MHQ1, No / Rarely/sometimes / Often/Very Often	20490
Sexual abuse as a child MHQ2	Sexually molested as a child, MHQ2	When I was growing up… Someone molested me (sexually): Never true/Rarely True/Sometimes true/Often/Very often true/Prefer not to answer	Sexually abused as a child MHQ2, No / Rarely/sometimes / Often/Very Often	29079
Physical abuse as a child MHQ1	Physically abused by family as a child, MHQ1	When I was growing up… People in my family hit me so hard that it left me with bruises or marks: Never true/Rarely True/Sometimes true/Often/Very often true/Prefer not to answer	Physically abused as a child MHQ1, No / Rarely/sometimes / Often/Very Often	20488
Physical abuse as a child MHQ2	Physically abused by family as a child, MHQ2	When I was growing up… People in my family hit me so hard that it left me with bruises or marks: Never true/Rarely True/Sometimes true/Often/Very often true/Prefer not to answer	Physically abused as a child MHQ2, No / Rarely/sometimes / Often/Very Often	29077
Emotional abuse as a child MHQ1	Felt hated by family member as a child, MHQ1	When I was growing up… I felt that someone in my family hated me: Never true/Rarely True/Sometimes true/Often/Very often true/Prefer not to answer	Emotionally abused as a child MHQ1, No / Rarely/sometimes / Often/Very Often	20487
Emotional abuse as a child MHQ2	Felt hated by family member as a child, MHQ2	When I was growing up… I felt that someone in my family hated me: Never true/Rarely True/Sometimes true/Often/Very often true/Prefer not to answer	Emotionally abused as a child MHQ2, No / Rarely/sometimes / Often/Very Often	29078
Able to confide	The frequency of ability to confide in someone	How often are you able to confide in someone close to you? Almost daily/2-4 times a week/About once a week/About once a month/Once every few months/Never or almost never/Do not know/Prefer not to answer	Able to confide, Never/Few times a year/Few times a week/Almost daily	2110
Frequency of friend/family visits	Frequency of visits to friends or family outside household	How often do you visit friends or family or have them visit you? Almost daily/2-4 times a week/About once a week/About once a month/Once every few months/Never or almost never/No friends/family outside household/Do not know/Prefer not to answer	Family/friend visits, Never/no friends outside household/Few times a year/Few times a week/Almost daily	1031
Risk taking	Risk-taking behaviour	Would you describe yourself as soemone who takes risks? Yes/No/Do not know/Prefer not to answer	Risk taking, No/Yes	2040
Neuroticism	Neuroticism score, as derived by Smith et al. (2013)2	Continuous, composite score	Continuous, composite score	20127
Chronic pain	Chronic pain for longer than 3 months, for details see Johnston et al. (2019)3	Headaches/Facial pain/Neck/shoulder pain/Back pain/Stomach/abdominal pain/hip pain/Knee pain longer than 3 months: Yes/ No/Do Noy know/Prefer not to answer	Pain at any site longer than 3m, Yes/No	6159, 3799, 4067, 3404, 3571, 3741, 3414, 3773
Lifetime depression MHQ1	Self-reported lifetime major depressive disorder symptoms, for details refer to Davis et al (2020)4, MHQ1; excluding participants with bipolar disorder and schizophrenia	Ever had prolonged feelings of sadness or depression; No/Yes/Prefer not to answer	Depression ever MHQ1 (composite score), Yes/No	20446, 20441, 20532, 20435, 20450,20437, 20536, 20436,20439, 20440
		Ever had prolonged loss of interest in normal activities ; No/Yes/Prefer not to answer
		Feelings of tiredness during worst episode of depression; No/Yes/Prefer not to answer/Do not know
		Did your sleep change?; No/Yes/Prefer not to answer/Do not know
		Difficulty concentrating during worst depression; No/Yes/Prefer not to answer/Do not know
		Feelings of worthlessness during worst episode of depression; No/Yes/Prefer not to answer/Do not know
		Thoughts of death during worst depression; No/Yes/Prefer not to answer/Do not know
		Weight change during worst episode of depression; Prefer not to answer/Do not know/Stayed about the same or was on a diet/Gained weight/Lost weight/Both gained and lost some weight during the episode
Lifetime depression MHQ2	Self-reported lifetime major depressive disorder symptoms, for details refer to Davis et al (2025)5, MHQ2; excluding participants with bipolar disorder and schizophrenia	Ever had prolonged feelings of sadness or depression; No/Yes/Prefer not to answer	Depression ever MHQ2 (composite score), Yes/No	29011, 29012, 29018, 29022, 29026, 29027, 29029, 29021, 29014, 29015, 29031
		Ever had prolonged loss of interest in normal activities ; No/Yes/Prefer not to answer
		Feelings of tiredness during worst episode of depression; No/Yes/Prefer not to answer/Do not know
		Did your sleep change?; No/Yes/Prefer not to answer/Do not know
		Feelings of worthlessness during worst episode of depression; No/Yes/Prefer not to answer/Do not know
		Thoughts of death during worst depression; No/Yes/Prefer not to answer/Do not know
		Weight change during worst episode of depression; Prefer not to answer/Do not know/Stayed about the same or was on a diet/Gained weight/Lost weight/Both gained and lost some weight during the episode
Lifetime bipolar disorder MHQ1	Self-reported lifetime bipolar disorder symptoms, for details refer to Davis et al (2020)4, MHQ1; excluding participants with schizophrenia	Please try to remember a period when you were in a "high" or "iritable" state and select all of the following that apply: I was more active than usual / I was more talkative than usual / I needed less sleep than usual / I was more creative or had more ideas than usual / I was more restless than usual / I was more confident than usual / My thoughts were racing / I was easily distracted / None of t…	Bipolar disorder ever MHQ1 (composite score), Bipolar 1 or 2/No	20548, 20501, 20492, 20493, Lifetime depression MHQ1
		Have you ever had a period of time when you were feeling so good, "high", "excited", or "hyper" that other people thought you were not your normal self or you were so "hyper" that you got into trouble? Yes/No/Do not know/Prefer not to answer; Have you ever had a period of time when you were so iritable that you found yourself shouting at people or starting fights or arguments? Yes/No/Do not know/…
		What is the longest time that these "high" or "iritable" periods have lasted? Less than 24h/At least a day, but less than a week/A week or more/Do not know/Prefer not to answer
		How much of a problem have these "high" or "iritable" periods caused you? No problems/Needed treatment or caused problems with work, relationships, finances, the law or toher aspects of life/Do not know/Prefer not to answer
Lifetime bipolar disorder MHQ2	Self-reported lifetime bipolar disorder symptoms, for details refer to Davis et al (2025)5, MHQ2; excluding participants with schizophrenia	Please try to remember a period when you were in a "high" or "iritable" state and select all of the following that apply: I was more active than usual / I was more talkative than usual / I needed less sleep than usual / I was more creative or had more ideas than usual / I was more restless than usual / I was more confident than usual / My thoughts were racing / I was easily distracted / None of t…	Bipolar disorder ever MHQ2 (composite score), Bipolar 1 or 2/No	29051, 29049, 29052, 29057, 29056, Lifetime depression MHQ2
		Have you ever had a period of time when you were feeling so good, "high", "excited", or "hyper" that other people thought you were not your normal self or you were so "hyper" that you got into trouble? Yes/No/Do not know/Prefer not to answer; Have you ever had a period of time when you were so iritable that you found yourself shouting at people or starting fights or arguments? Yes/No/Do not know/…
		What is the longest time that these "high" or "iritable" periods have lasted? Less than 24h/At least a day, but less than four days in a row/ At least four days in a row, but less than a week/A week or more/Do not know/Prefer not to answer
		How much of a problem have these "high" or "iritable" periods caused you? Needed treatment: No/Yes/Prefer not to answer; Caused problems with work, relationships, finances, the law or toher aspects of life: No/Yes/Prefer not to answer
Schizophrenia	Diagnosis of schizophrenia, for details see Legge et al. (2021)6	Presence of F20.0-F20.9 ICD code in any of: self-report, hospital admissions, death records, or primary care records	Schizophrenia, Yes/No	20002, 20544, 29000, 41270, 41202, 41204, 40001, 40002, 130875
Abbreviations: MHQ1: ‘Thoughts and Feelings’ (Mental Health Questionnaire 1; 2016); MHQ2: ‘Health and Wellbeing’ (Mental Health Questionnaire 2; 2022); ICD-10: International Statistical Classification of Diseases and Related Health Problems, 10th Revision.
References: 1 Strawbridge RJ, Ward J, Ferguson A, Graham N, Shaw RJ, Cullen B, Pearsall R, Lyall LM, Johnston KJA, Niedzwiedz CL, Pell JP, Mackay D, Martin JL, Lyall DM, Bailey MES & Smith DJ. Identification of novel genome-wide associations for suicidality in UK Biobank, genetic correlation with psychiatric disorders and polygenic association with completed suicide. EBioMedicine 41, 517–525 (201…
