# Supplementary material
Source: Research Square preprint supplement (doi:10.21203/rs.3.rs-8873105/v1)
Supplement: Supplementary file 3 [file 0f89772dfff7f097003b49dc.xlsx]

## Sheet: ST8
Supplemental Table 8. Associations of vitamin D levels with suicide outcomes for female MHQ2 participants.
	Passive suicidal ideation						Self-harm ideation						Self-harm behaviour						Suicide attempt
	Basic			Expanded			Basic			Expanded			Basic			Expanded			Basic			Expanded
	RRR	95% CI	P	RRR	95% CI	P	RRR	95% CI	P	RRR	95% CI	P	RRR	95% CI	P	RRR	95% CI	P	RRR	95% CI	P	RRR	95% CI	P
Serum vitamin D status (default: Optimal)
Deficiency	1.28211	[1.21 1.36]	1.16749e-16	1.20085	[1.11 1.30]	6.83874e-06	1.36579	[1.27 1.47]	4.05089e-17	1.25819	[1.14 1.39]	6.46463e-06	1.35731	[1.19 1.54]	2.85499e-06	1.12103	[0.95 1.33]	0.189346	1.61325	[1.43 1.82]	2.13925e-15	1.3159	[1.12 1.55]	0.00103478
Insufficiency	1.11383	[1.07 1.16]	7.20796e-08	1.05405	[1.00 1.11]	0.0437775	1.15379	[1.10 1.21]	2.39592e-08	1.08012	[1.01 1.15]	0.0227671	1.18489	[1.08 1.30]	0.000215636	1.10452	[0.99 1.24]	0.0844417	1.20057	[1.10 1.31]	3.87218e-05	1.08713	[0.97 1.22]	0.149407
Age	0.826837	[0.64 1.06]	0.140494	0.808322	[0.59 1.11]	0.188777	0.645863	[0.46 0.90]	0.0102385	0.629266	[0.41 0.96]	0.0295422	1.08442	[0.69 1.70]	0.724535	0.952155	[0.54 1.67]	0.863871	1.08732	[0.70 1.69]	0.708788	0.972333	[0.56 1.68]	0.919529
Ethnicity (default: White European)
South Asian	0.611697	[0.48 0.79]	0.000120753	0.480541	[0.34 0.67]	1.79463e-05	0.639174	[0.48 0.85]	0.00243916	0.365607	[0.24 0.55]	9.67462e-07	0.528929	[0.31 0.91]	0.0201689	0.294868	[0.15 0.57]	0.000332184	1.21525	[0.84 1.75]	0.295612	0.37863	[0.22 0.65]	0.000401367
African Caribbean	0.564525	[0.38 0.85]	0.00577337	0.486128	[0.27 0.87]	0.0147837	0.433055	[0.25 0.76]	0.00377039	0.448765	[0.22 0.93]	0.0319873	0.886034	[0.43 1.81]	0.739829	0.567295	[0.20 1.60]	0.284575	0.320689	[0.10 1.01]	0.051232	0.476168	[0.14 1.59]	0.228275
Chinese	0.978376	[0.83 1.15]	0.795239	0.896723	[0.72 1.12]	0.326972	0.974299	[0.80 1.19]	0.796999	0.818956	[0.63 1.07]	0.139295	0.874119	[0.61 1.25]	0.457179	0.589869	[0.37 0.94]	0.0276169	1.53861	[1.17 2.02]	0.00187804	1.02401	[0.71 1.48]	0.89946
Mixed or other	0.983761	[0.98 0.99]	2.4855e-38	0.99882	[0.99 1.00]	0.57419	0.946545	[0.94 0.95]	5.19122e-253	0.969174	[0.96 0.97]	3.11131e-31	0.919836	[0.91 0.93]	2.22223e-175	0.946225	[0.94 0.95]	5.91677e-33	0.947571	[0.94 0.95]	1.31011e-84	0.991268	[0.98 1.00]	0.05385
Assessment centre region (default: South England/London)
Midlands/Wales				0.99919	[0.93 1.07]	0.982452				1.03463	[0.94 1.13]	0.469378				1.13475	[0.98 1.32]	0.0994318				1.23944	[1.07 1.44]	0.00430432
North England				0.901209	[0.85 0.95]	0.000112557				0.940759	[0.88 1.01]	0.0778283				0.828492	[0.74 0.93]	0.00165192				0.818212	[0.73 0.92]	0.000795585
Scotland				0.858196	[0.78 0.94]	0.00165109				0.824383	[0.73 0.93]	0.00247488				0.824793	[0.67 1.02]	0.0711472				0.707192	[0.57 0.88]	0.00216231
Season of blood sample taken (default: Summer)
Spring				0.952939	[0.89 1.02]	0.139689				0.944111	[0.87 1.02]	0.16995				0.998094	[0.87 1.15]	0.978818				0.986479	[0.86 1.14]	0.851181
Autumn				0.993346	[0.93 1.06]	0.838805				0.970205	[0.89 1.05]	0.474298				0.985165	[0.85 1.14]	0.837524				1.16799	[1.01 1.34]	0.0307679
Winter				0.953466	[0.89 1.02]	0.191371				0.923216	[0.84 1.01]	0.090496				1.05873	[0.91 1.24]	0.472142				1.0772	[0.92 1.26]	0.352357
BMI				0.997678	[0.99 1.00]					1.01019	[1.00 1.02]					0.992571	[0.98 1.00]	0.165511				1.00325	[0.99 1.01]	0.518479
Physical activity (default: None)
Low				0.965781	[0.76 1.23]	0.777954				0.692955	[0.53 0.90]	0.00547459				0.943382	[0.58 1.53]	0.81428				0.484261	[0.33 0.70]	0.000126633
Moderate				1.02987	[0.81 1.31]	0.807489				0.672319	[0.52 0.86]	0.00200599				0.99033	[0.62 1.59]	0.968004				0.497344	[0.35 0.71]	0.000121069
High				1.00574	[0.79 1.28]	0.962341				0.706354	[0.55 0.91]	0.00703112				0.982949	[0.61 1.58]	0.943627				0.532319	[0.37 0.76]	0.000546994
Townsend deprivation index (default: 1 [most deprived])
2				0.890564	[0.83 0.96]	0.00195276				0.910442	[0.83 1.00]	0.0469958				0.8314	[0.71 0.97]	0.0183323				0.861947	[0.74 1.00]	0.0500162
3				0.822595	[0.76 0.89]	3.72095e-07				0.857262	[0.78 0.94]	0.00157019				0.83465	[0.71 0.98]	0.0247153				0.712479	[0.61 0.84]	3.39468e-05
4				0.834263	[0.77 0.90]	2.48437e-06				0.787127	[0.71 0.87]	1.54482e-06				0.770311	[0.65 0.91]	0.00162812				0.718538	[0.61 0.84]	6.03532e-05
5				0.795404	[0.74 0.86]	3.59968e-09				0.829607	[0.75 0.91]	0.000169958				0.694376	[0.59 0.82]	1.95857e-05				0.60124	[0.51 0.71]	6.58624e-09
Housing tenure (default: Own outright)
Rent/mortgage payment				0.964347	[0.91 1.02]	0.187115				1.02441	[0.96 1.10]	0.495189				0.997873	[0.89 1.12]	0.971828				1.10838	[0.98 1.25]	0.0929989
Rent from local authority				1.04526	[0.88 1.24]	0.613994				1.27657	[1.05 1.55]	0.0146119				1.28228	[0.94 1.74]	0.111139				2.0589	[1.60 2.65]	1.71033e-08
Live in accomodation rent-free				0.896766	[0.65 1.23]	0.501081				1.32177	[0.93 1.87]	0.116805				0.916892	[0.47 1.77]	0.796546				1.82025	[1.09 3.04]	0.0217832
None of the options				1.22931	[0.83 1.82]	0.299401				1.32014	[0.83 2.10]	0.240732				0.67758	[0.27 1.73]	0.414361				1.17875	[0.56 2.49]	0.666751
Population density (default:Urban)
Rural				0.935058	[0.86 1.02]	0.122965				0.999461	[0.90 1.12]	0.992343				0.918165	[0.75 1.12]	0.394618				0.89986	[0.73 1.10]	0.309797
Highest level of education attained (defauult: College or University degree)
A levels/AS levels or equivalent				0.900309	[0.83 0.98]	0.0117447				0.854103	[0.77 0.95]	0.00283965				0.737588	[0.62 0.88]	0.000779987				0.866548	[0.73 1.03]	0.112616
O levels/GCSEs or equivalent				0.803088	[0.75 0.86]	4.81707e-11				0.696893	[0.64 0.76]	3.40845e-16				0.506143	[0.43 0.60]	1.9288e-16				0.749298	[0.65 0.87]	0.000124856
CSEs or equivalent				0.715289	[0.63 0.81]	2.11176e-07				0.558344	[0.47 0.66]	6.76296e-12				0.567705	[0.43 0.74]	3.21488e-05				0.76445	[0.60 0.98]	0.0329326
NVQ or HND or HNC or equivalent				0.85801	[0.75 0.98]	0.0291089				0.734143	[0.61 0.88]	0.000702713				0.594322	[0.43 0.82]	0.00165358				0.56473	[0.41 0.78]	0.000436455
Other professional qualifications eg: nursing, teaching				0.873904	[0.82 0.93]	8.8483e-05				0.845882	[0.78 0.92]	0.000162981				0.757178	[0.65 0.88]	0.000331768				0.912851	[0.79 1.06]	0.223656
Employment status (default: Employed/student)
Retired				0.989843	[0.93 1.05]	0.734507				0.979778	[0.91 1.06]	0.602646				0.973942	[0.85 1.11]	0.699389				0.949089	[0.83 1.08]	0.443939
Unemployed for various reasons				1.09086	[1.00 1.19]	0.0516308				1.06288	[0.96 1.18]	0.260306				1.22324	[1.04 1.44]	0.0149928				1.46325	[1.25 1.72]	3.47921e-06
Other				1.03623	[0.94 1.14]	0.455168				1.04267	[0.93 1.17]	0.466406				0.894722	[0.74 1.09]	0.260457				1.06149	[0.88 1.27]	0.523229
Sexually abused as a child (default: No)
Rarely/Sometimes				1.41878	[1.31 1.53]	2.42725e-18				1.83528	[1.68 2.01]	1.30653e-39				2.09635	[1.82 2.41]	7.2549e-25				2.38014	[2.08 2.72]	1.09163e-36
Often/Very often				1.33772	[1.12 1.60]	0.00133005				1.84265	[1.53 2.22]	9.71315e-11				2.50295	[1.94 3.23]	1.43299e-12				3.19313	[2.56 3.99]	1.33178e-24
Physically abused as a child (default: No)
Rarely/Sometimes				1.16739	[1.09 1.25]	7.37302e-06				1.39147	[1.28 1.51]	4.99392e-16				1.69706	[1.50 1.92]	1.2853e-16				1.55538	[1.37 1.76]	6.12128e-12
Often/Very often				0.918181	[0.76 1.11]	0.371324				1.17879	[0.97 1.43]	0.0981447				1.36558	[1.03 1.81]	0.0296024				1.57183	[1.23 2.00]	0.000240324
Emotionally abused as a child (default: No)
Rarely/Sometimes				1.87959	[1.76 2.01]	3.34443e-81				2.03408	[1.88 2.20]	3.72381e-70				2.30495	[2.03 2.61]	1.65264e-38				2.78288	[2.46 3.15]	5.23956e-58
Often/Very often				2.17901	[1.93 2.46]	2.85278e-35				2.94749	[2.58 3.37]	1.74165e-57				3.44731	[2.84 4.18]	3.27152e-36				4.72077	[3.95 5.64]	1.30248e-65
Adopted as a child (default: No)						0.54167
Yes				1.06734	[0.87 1.32]					1.18283	[0.92 1.52]	0.186074				1.61884	[1.12 2.33]	0.00988174				1.47581	[1.03 2.12]	0.0361181
Risk taking behaviour (default: No)
Yes				1.21841	[1.15 1.29]	5.0132e-12				1.29768	[1.21 1.39]	2.93749e-13				1.22674	[1.09 1.38]	0.000639894				1.67174	[1.50 1.87]	1.27437e-19
Neuroticism				1.17215	[1.16 1.18]	0				1.18322	[1.17 1.19]	4.22539e-246				1.18813	[1.17 1.21]	8.14665e-93				1.20624	[1.19 1.23]	1.04538e-109
Family/friend visits (default: Never/no friends outside household)
Few times a year				0.92729	[0.70 1.24]	0.606793				0.675246	[0.50 0.92]	0.0124967				0.855462	[0.51 1.44]	0.555816				0.608586	[0.40 0.93]	0.0204988
Few times a week				0.893761	[0.67 1.19]	0.439149				0.611933	[0.45 0.83]	0.00155161				0.731697	[0.44 1.22]	0.233433				0.538039	[0.36 0.81]	0.00323373
Almost daily				0.827605	[0.62 1.11]	0.204091				0.5594	[0.41 0.77]	0.000320715				0.674695	[0.39 1.15]	0.151005				0.463407	[0.30 0.72]	0.000594931
Able to confide (default: Never)
Few times a year				0.970094	[0.88 1.08]	0.563064				0.895969	[0.79 1.02]	0.0892321				0.895992	[0.72 1.12]	0.325283				0.697051	[0.57 0.85]	0.000426481
Few times a week				0.971001	[0.89 1.06]	0.519047				0.814126	[0.73 0.91]	0.000263418				0.931848	[0.77 1.12]	0.462108				0.677348	[0.57 0.80]	7.95478e-06
Almost daily				0.790526	[0.73 0.86]	4.50692e-08				0.674276	[0.61 0.75]	8.9961e-14				0.708522	[0.59 0.85]	0.000165444				0.551178	[0.47 0.65]	3.77888e-13
Pain at any site longer than 3 months (default: No)
Yes				1.07819	[1.03 1.13]	0.00310945				1.15049	[1.08 1.23]	1.33086e-05				1.06987	[0.96 1.19]	0.220208				1.02788	[0.92 1.14]	0.614062
Bipolar disorder status (default: No)
Bipolar 1 or 2				3.6978	[2.93 4.66]	1.65243e-28				6.85671	[5.40 8.70]	1.5409e-56				6.85797	[4.93 9.53]	2.2733e-30				15.7799	[11.87 20.98]	2.27437e-80
Depression ever (default: No)
Yes				3.1026	[2.94 3.27]	0				5.15431	[4.84 5.49]	0				4.20855	[3.78 4.68]	1.83683e-152				7.81116	[7.00 8.72]	0
Schizophrenia diagnosis (default: No)
Yes				1.03226	[0.41 2.60]	0.946222				2.93305	[1.24 6.93]	0.0142206				1.07404	[0.14 8.24]					14.1156	[6.21 32.08]	2.61049e-10
Intercept	0.720384	[0.61 0.86]	0.00022462	0.140518	[0.09 0.23]	3.42156e-15	5.44934	[4.39 6.77]	4.8812e-53	0.666898	[0.38 1.17]	0.159246	10.0811	[6.85 14.84]	1.06835e-31	0.905104	[0.34 2.41]	0.841673	1.48559	[1.03 2.15]	0.0358637	0.0454342	[0.02 0.11]	4.71261e-12
Abbreviations: MHQ2: ‘Health and Wellbeing’ (Mental Health Questionnaire 2; 2022); RRR: relative risk ratio; CI: confidence interval
Note: Statistical significance at p<.0125; Nbasic = 85,436; Nexpanded = 61,741

## Sheet: metrics
Number of observations	85439		61751
AIC	167471		105067
BIC	167771		107017
** p<.00125, * p<.00625
