# Supplementary material
Source: Research Square preprint supplement (doi:10.21203/rs.3.rs-8873105/v1)
Supplement: Supplementary file 4 [file 14e30bea737e736186ad4185.xlsx]

## Sheet: ST7
Supplemental Table 7. Associations of vitamin D levels with suicide outcomes for female MHQ1 participants.
	Passive suicidal ideation						Self-harm ideation						Self-harm behaviour						Suicide attempt
	Basic			Expanded			Basic			Expanded			Basic			Expanded			Basic			Expanded
	RRR	95% CI	P	RRR	95% CI	P	RRR	95% CI	P	RRR	95% CI	P	RRR	95% CI	P	RRR	95% CI	P	RRR	95% CI	P	RRR	95% CI	P
Serum vitamin D status (default: Optimal)
Deficiency	1.28221	[1.21 1.36]	2.06184e-16	1.16533	[1.08 1.26]	0.000188186	1.33742	[1.25 1.43]	3.52156e-16	1.14768	[1.04 1.26]	0.00514331	1.54182	[1.35 1.76]	2.17498e-10	1.21512	[1.02 1.45]	0.0312715	1.58101	[1.39 1.80]	2.22954e-12	1.15949	[0.97 1.38]	0.0990983
Insufficiency	1.11372	[1.07 1.16]	1.06536e-07	1.06337	[1.01 1.12]	0.0194972	1.13982	[1.09 1.20]	9.01673e-08	1.06348	[1.00 1.13]	0.0562646	1.26425	[1.15 1.39]	2.01675e-06	1.11705	[0.99 1.26]	0.0746512	1.1185	[1.02 1.23]	0.021573	1.01882	[0.90 1.15]	0.764738
Age	0.983169	[0.98 0.99]	1.76967e-42	0.995696	[0.99 1.00]	0.0443997	0.956597	[0.95 0.96]	3.40779e-195	0.97673	[0.97 0.98]	7.70015e-20	0.927681	[0.92 0.93]	1.55224e-136	0.959205	[0.95 0.97]	8.61412e-18	0.948063	[0.94 0.95]	1.47123e-74	0.978771	[0.97 0.99]	9.10195e-06
Ethnicity (default: White European)
South Asian	0.93449	[0.73 1.20]	0.595622	0.855447	[0.62 1.17]	0.331533	0.604519	[0.43 0.85]	0.00380396	0.487636	[0.32 0.75]	0.00125665	0.596596	[0.32 1.13]	0.112794	0.609065	[0.31 1.19]	0.148788	1.05574	[0.64 1.74]	0.831013	0.705541	[0.37 1.36]	0.299503
African Caribbean	0.71918	[0.58 0.90]	0.00351881	0.590504	[0.44 0.79]	0.000472515	0.591974	[0.45 0.78]	0.000148854	0.39179	[0.27 0.57]	6.98524e-07	0.322258	[0.17 0.63]	0.000844513	0.138828	[0.06 0.35]	2.23656e-05	1.01126	[0.68 1.51]	0.956598	0.475821	[0.28 0.80]	0.00554474
Chinese	0.565503	[0.38 0.83]	0.0036628	0.470732	[0.28 0.80]	0.0056373	0.518764	[0.33 0.83]	0.00583211	0.427506	[0.22 0.81]	0.00975515	0.420704	[0.16 1.14]	0.0882899	0.236412	[0.06 0.99]	0.0484056	0.333318	[0.11 1.05]	0.0598503	0.386599	[0.12 1.30]	0.124426
Mixed or other	1.09437	[0.93 1.28]	0.265328	1.13968	[0.93 1.40]	0.206404	1.00251	[0.83 1.21]	0.979194	0.858513	[0.67 1.11]	0.23804	1.1522	[0.83 1.60]	0.39507	0.712731	[0.46 1.12]	0.138796	1.45471	[1.08 1.96]	0.0144085	0.919013	[0.61 1.38]	0.681835
Assessment centre region (default: South England/London)
Midlands/Wales				0.947586	[0.88 1.02]	0.146662				0.995233	[0.91 1.09]	0.91486				1.02512	[0.87 1.20]	0.763591				1.17117	[1.00 1.37]	0.0498188
North England				0.870461	[0.83 0.92]	3.65729e-07				0.883207	[0.83 0.94]	0.000187731				0.768942	[0.68 0.87]	4.35033e-05				0.820924	[0.72 0.93]	0.00216163
Scotland				0.89002	[0.81 0.98]	0.0173588				0.799044	[0.71 0.90]	0.000296418				0.843369	[0.68 1.05]	0.132074				0.787803	[0.62 1.00]	0.0499661
Season of blood sample taken (default: Summer)
Spring				0.956039	[0.90 1.02]	0.170318				1.00277	[0.93 1.09]	0.945223				1.05977	[0.91 1.23]	0.45049				1.07526	[0.93 1.25]	0.337496
Autumn				0.960509	[0.90 1.02]	0.222093				1.03117	[0.95 1.12]	0.445937				0.983454	[0.84 1.15]	0.831657				0.957277	[0.82 1.12]	0.576924
Winter				0.913954	[0.85 0.98]	0.014189				0.933094	[0.85 1.02]	0.125422				1.06533	[0.90 1.26]	0.455943				0.972829	[0.82 1.15]	0.747849
BMI				1.00077	[1.00 1.01]	0.759226				1.00855	[1.00 1.01]	0.00391687				1.0001	[0.99 1.01]	0.985063				1.00216	[0.99 1.01]	0.685371
Physical activity (default: None)
Low				1.02973	[0.82 1.30]	0.805544				0.768559	[0.60 0.98]	0.0355489				1.07464	[0.63 1.82]	0.788936				0.628366	[0.42 0.93]	0.0212513
Moderate				1.02233	[0.81 1.28]	0.84933				0.710502	[0.56 0.90]	0.00498264				1.22081	[0.73 2.04]	0.445958				0.588336	[0.40 0.86]	0.00627268
High				0.986584	[0.78 1.24]	0.907813				0.711707	[0.56 0.90]	0.00541273				1.28583	[0.77 2.15]	0.338334				0.607198	[0.41 0.89]	0.0105347
Townsend deprivation index (default: 1 [most deprived])
2				0.946018	[0.88 1.02]	0.140146				0.898955	[0.82 0.98]	0.0178116				0.909547	[0.77 1.07]	0.246423				0.787807	[0.67 0.92]	0.0029221
3				0.895768	[0.83 0.97]	0.00432332				0.829127	[0.76 0.91]	6.03677e-05				0.843425	[0.71 1.00]	0.0488284				0.682701	[0.58 0.81]	1.02368e-05
4				0.85205	[0.79 0.92]	4.24361e-05				0.811471	[0.74 0.89]	1.0083e-05				0.773195	[0.65 0.92]	0.00405879				0.656667	[0.55 0.78]	2.14163e-06
5				0.835681	[0.77 0.90]	4.3546e-06				0.815421	[0.74 0.89]	1.52347e-05				0.686746	[0.57 0.82]	4.26038e-05				0.52599	[0.44 0.63]	1.17146e-11
Housing tenure (default: Own outright)
Rent/mortgage payment				1.0263	[0.97 1.08]	0.356885				1.04368	[0.98 1.12]	0.210395				1.14907	[1.01 1.31]	0.0331846				1.10291	[0.97 1.26]	0.137646
Rent from local authority				1.09449	[0.92 1.30]	0.295237				1.18535	[0.98 1.43]	0.0784603				1.45797	[1.07 1.98]	0.015642				1.79334	[1.38 2.33]	1.25151e-05
Live in accomodation rent-free				1.29941	[0.97 1.74]	0.0769539				1.11396	[0.78 1.59]	0.551929				1.15075	[0.61 2.18]	0.667416				1.31219	[0.72 2.41]	0.380135
None of the options				1.05365	[0.70 1.58]	0.798889				0.862049	[0.52 1.43]	0.563504				1.18125	[0.53 2.66]	0.687114				1.26181	[0.58 2.77]	0.561718
Population density (default:Urban)
Rural				1.01344	[0.93 1.10]	0.757938				1.00448	[0.90 1.12]	0.933909				1.03186	[0.84 1.27]	0.764548				0.915779	[0.73 1.14]	0.437924
Highest level of education attained (defauult: College or University degree)
A levels/AS levels or equivalent				0.919728	[0.85 1.00]	0.0461208				0.787103	[0.71 0.87]	3.60465e-06				0.752256	[0.62 0.91]	0.00312995				1.06056	[0.89 1.27]	0.520127
O levels/GCSEs or equivalent				0.817058	[0.76 0.87]	1.86943e-09				0.675371	[0.62 0.73]	2.03449e-20				0.557917	[0.47 0.66]	7.64902e-12				0.794568	[0.68 0.93]	0.00386435
CSEs or equivalent				0.800711	[0.70 0.91]	0.000632972				0.546721	[0.46 0.65]	1.62791e-12				0.582135	[0.43 0.78]	0.000306823				0.71103	[0.53 0.95]	0.0192201
NVQ or HND or HNC or equivalent				0.775592	[0.67 0.90]	0.000625853				0.761696	[0.64 0.90]					0.520594	[0.36 0.75]	0.000416062				0.593214	[0.42 0.84]	0.00288649
Other professional qualifications eg: nursing, teaching				0.866823	[0.81 0.93]	3.39971e-05				0.770808	[0.71 0.84]	9.75619e-10				0.670836	[0.57 0.79]	2.48147e-06				0.829273	[0.71 0.97]	0.0225509
Employment status (default: Employed/student)
Retired				1.02282	[0.96 1.09]	0.50443				1.00158	[0.92 1.09]	0.97019				0.922639	[0.78 1.09]	0.349587				1.06228	[0.90 1.25]	0.464167
Unemployed for various reasons				1.08018	[0.99 1.17]	0.0716251				0.987179	[0.89 1.09]	0.802124				1.32267	[1.12 1.56]	0.000895141				1.45899	[1.24 1.72]	8.84778e-06
Other				1.03327	[0.95 1.13]	0.465517				1.05405	[0.95 1.17]	0.312633				0.988881	[0.82 1.19]	0.907609				1.1224	[0.93 1.35]	0.21862
Sexually abused as a child (default: No)
Rarely/Sometimes				1.34247	[1.24 1.45]	7.02489e-14				1.73328	[1.59 1.89]	1.42504e-36				2.34483	[2.04 2.70]	2.23561e-32				2.19804	[1.91 2.53]
Often/Very often				1.20133	[0.96 1.50]	0.106496				1.84504	[1.48 2.30]	6.3081e-08				2.92569	[2.15 3.99]	1.17482e-11				3.35913	[2.55 4.43]	1.05433e-17
Physically abused as a child (default: No)
Rarely/Sometimes				1.27117	[1.19 1.36]	1.03622e-12				1.44942	[1.34 1.56]	3.45537e-22				1.80937	[1.59 2.06]	3.46892e-19				1.94749	[1.71 2.22]	5.93844e-24
Often/Very often				1.31281	[1.06 1.63]	0.0125308				1.26749	[1.01 1.59]	0.0397446				1.38735	[0.99 1.94]	0.0571345				1.83738	[1.37 2.46]	4.51193e-05
Emotionally abused as a child (default: No)
Rarely/Sometimes				1.6693	[1.56 1.79]	2.67528e-50				2.00422	[1.86 2.16]	3.40174e-71				2.31805	[2.03 2.65]	3.59261e-35				2.3632	[2.07 2.70]	7.71965e-36
Often/Very often				2.03955	[1.76 2.36]	1.13558e-21				3.1253	[2.69 3.63]	1.40188e-50				3.86059	[3.09 4.82]	1.32071e-32				4.97253	[4.05 6.10]	1.50095e-53
Adopted as a child (default: No)
Yes				0.981611	[0.80 1.21]	0.862429				1.08573	[0.85 1.38]	0.50433				1.62481	[1.11 2.37]	0.0118582				2.15618	[1.55 3.00]	5.36687e-06
Risk taking behaviour (default: No)
Yes				1.2538	[1.19 1.33]	3.87054e-15				1.35343	[1.27 1.45]	6.42173e-19				1.34196	[1.19 1.52]	3.18939e-06				1.68506	[1.50 1.90]	1.20826e-17
Neuroticism				1.16063	[1.15 1.17]	1.80575e-302				1.17562	[1.16 1.19]	5.182e-247				1.20283	[1.18 1.22]	2.12269e-93				1.21359	[1.19 1.24]	1.56855e-102
Family/friend visits (default: Never/no friends outside household)
Few times a year				0.958884	[0.72 1.28]	0.776887				0.83674	[0.61 1.14]	0.262292				0.753403	[0.47 1.21]	0.237512				0.651328	[0.42 1.01]	0.055551
Few times a week				0.918544	[0.69 1.22]	0.562497				0.721674	[0.53 0.98]	0.0380921				0.590817	[0.37 0.94]	0.0261862				0.594165	[0.39 0.91]	0.0179099
Almost daily				0.945091	[0.70 1.27]	0.707379				0.687831	[0.50 0.95]	0.0216857				0.618041	[0.38 1.01]	0.0550503				0.501395	[0.32 0.80]	0.00345831
Able to confide (default: Never)
Few times a year				0.933711	[0.84 1.04]	0.193557				0.810788	[0.72 0.92]	0.000979492				0.759994	[0.61 0.95]	0.0148044				0.681718	[0.55 0.84]	0.000441162
Few times a week				0.852812	[0.78 0.93]	0.000566828				0.824781	[0.74 0.92]	0.000427429				0.708896	[0.59 0.86]	0.000406192				0.656942	[0.55 0.79]	6.03025e-06
Almost daily				0.729529	[0.67 0.79]	3.72283e-13				0.677782	[0.61 0.75]	4.94763e-14				0.574495	[0.48 0.69]	1.69108e-09				0.525921	[0.44 0.62]	2.85137e-13
Pain at any site longer than 3 months (default: No)
Yes				1.08744	[1.03 1.14]	0.00111123				1.12272	[1.06 1.19]	0.000187617				1.09793	[0.98 1.23]	0.110788				1.1524	[1.03 1.29]	0.0140798
Bipolar disorder status (default: No)
Bipolar 1 or 2				3.79418	[2.95 4.88]	4.19316e-25				6.8682	[5.31 8.88]	9.78605e-49				8.5553	[6.00 12.20]	1.86339e-32				14.3502	[10.28 20.03]	2.65e-55
Depression ever (default: No)
Yes				2.6843	[2.55 2.82]	0				4.41953	[4.16 4.69]	0				3.79801	[3.39 4.25]	2.36379e-117				6.42136	[5.70 7.24]	1.50348e-203
Schizophrenia diagnosis (default: No)
Yes				1.39519	[0.53 3.70]	0.502816				5.23788	[2.32 11.81]	6.56924e-05				1.62803	[0.21 12.83]	0.643609				24.1432	[10.21 57.08]	4.07791e-13
Intercept	0.812208	[0.69 0.95]	0.00984142	0.192643	[0.12 0.31]	1.81536e-11	2.81987	[2.34 3.39]	5.49239e-28	0.421551	[0.25 0.72]	0.00161918	3.71884	[2.58 5.35]	1.51966e-12	0.216811	[0.08 0.57]	0.00210525	1.0751	[0.75 1.54]	0.692511	0.0814447	[0.03 0.20]	4.12705e-08
Abbreviations: MHQ1: ‘Thoughts and Feelings’ (Mental Health Questionnaire 1; 2016); RRR: relative risk ratio; CI: confidence interval
Note: Statistical significance at p<.0125; Nbasic = 77,443; Nexpanded = 55,828

## Sheet: metrics
Number of observations	77443		55828
AIC	161345		102790
BIC	161642		104719

## Sheet: original
	severity_MHQ1	severity_MHQ1	severity_MHQ1	severity_MHQ1
Serum vitamin D status
Deficiency (<25)	1.28333	**	1.1651	**
	[1.209 1.362]		[1.075 1.263]
	1.62621e-16		0.000193169
Insufficient (25-49)	1.11362	**	1.06373
	[1.070 1.159]		[1.010 1.120]
	1.09395e-07		0.0188279
Age groups (quartiles)
59-65	0.914348	**	0.951904
	[0.871 0.960]		[0.895 1.013]
	0.000335052		0.117545
66-70	0.769103	**	0.923132
	[0.731 0.810]		[0.855 0.996]
	1.36939e-23		0.039551
71-81	0.729739	**	0.930715
	[0.691 0.771]		[0.848 1.021]
	8.03297e-30		0.129378
Ethnicity: main groups
South Asian	0.939766		0.863613
	[0.732 1.207]		[0.629 1.186]
	0.626395		0.36536
African Caribbean	0.726176	*	0.596404	**
	[0.582 0.906]		[0.443 0.802]
	0.00460688		0.000629044
Chinese	0.56441	*	0.480003
	[0.384 0.829]		[0.281 0.818]
	0.00354662		0.00702735
Mixed or other	1.1015		1.13888
	[0.940 1.291]		[0.930 1.395]
	0.232314		0.208946
Assessment centre region
Midlands/Wales			0.949179
			[0.883 1.021]
			0.159738
North England			0.87154	**
			[0.826 0.919]
			4.80751e-07
Scotland			0.888914
			[0.808 0.978]
			0.0161907
season_visit
Spring			0.956076
			[0.897 1.020]
			0.170831
Autumn			0.960455
			[0.900 1.025]
			0.221571
Winter			0.914438
			[0.851 0.983]
			0.0147946
BMI_category
Underweight			0.983632
			[0.759 1.275]
			0.900886
Overweight			1.00108
			[0.950 1.055]
			0.968008
Obesity			0.98256
			[0.917 1.052]
			0.614834
Severe obesity			1.1038
			[0.924 1.318]
			0.275172
At or above recommendation for moderate/vigorous activity
Low			1.03434
			[0.819 1.306]
			0.776751
Moderate			1.02611
			[0.817 1.289]
			0.824592
High			0.989362
			[0.787 1.244]
			0.926972
Townsend deprivation index (most (1) - least (5) deprived)
2			0.946628
			[0.879 1.019]
			0.144973
3			0.896062	*
			[0.831 0.966]
			0.00445743
4			0.851905	**
			[0.789 0.920]
			4.19687e-05
5			0.83597	**
			[0.774 0.903]
			4.59779e-06
Own or rent accomodation
Rent/mortgage payment			1.02738
			[0.972 1.085]
			0.33564
Rent from local authority			1.0947
			[0.924 1.296]
			0.29428
Live in accomodation rent-free			1.29962
			[0.972 1.737]
			0.0768177
None of the options			1.05074
			[0.703 1.571]
			0.809292
Population density
Rural			1.01313
			[0.931 1.103]
			0.763401
education_level_MHQ1
A levels/AS levels or equivalent			0.917705
			[0.845 0.996]
			0.040781
O levels/GCSEs or equivalent			0.816015	**
			[0.764 0.872]
			1.50654e-09
CSEs or equivalent			0.801174	**
			[0.705 0.910]
			0.000655945
NVQ or HND or HNC or equivalent			0.776678	**
			[0.671 0.898]
			0.000673086
Other professional qualifications eg: nursing, teaching			0.866242	**
			[0.810 0.927]
			3.10526e-05
Employment status per MHQ1
Retired			1.01803
			[0.950 1.091]
			0.612372
Unemployed for various reasons			1.07962
			[0.993 1.174]
			0.0736519
Other			1.03328
			[0.946 1.128]
			0.465542
Sexually abused as a child
Rarely/Sometimes			1.34364	**
			[1.244 1.451]
			5.99832e-14
Often/Very often			1.20253
			[0.962 1.503]
			0.104571
Physically abused as a child
Rarely/Sometimes			1.27232	**
			[1.191 1.359]
			8.60292e-13
Often/Very often			1.31463
			[1.062 1.628]
			0.0121293
Emotionally abused as a child
Rarely/Sometimes			1.66898	**
			[1.560 1.785]
			2.96027e-50
Often/Very often			2.03805	**
			[1.761 2.359]
			1.30825e-21
Adopted as a child
Yes			0.982315
			[0.796 1.212]
			0.867715
Risk taking behaviour
Yes			1.25386	**
			[1.185 1.327]
			3.91017e-15
Family/friend visits
Few times a year			0.949412
			[0.710 1.270]
			0.726258
Few times a week			0.9103
			[0.683 1.214]
			0.522131
Almost daily			0.936797
			[0.697 1.258]
			0.664566
Able to confide
Few times a year			0.933908
			[0.842 1.036]
			0.194939
Few times a week			0.853111	**
			[0.779 0.934]
			0.000582975
Almost daily			0.73004	**
			[0.671 0.795]
			4.16923e-13
Pain at any site longer than 3m
Yes			1.08726	**
			[1.034 1.143]
			0.00113742
Bipolar disorder status
Bipolar 1 or 2			3.79567	**
			[2.949 4.886]
			4.04056e-25
Depression ever
1			2.68738	**
			[2.554 2.828]
			0
Schizophrenia diagnosis
Yes			1.39307
			[0.526 3.689]
			0.504684
neuroticism			1.16083	**
			[1.152 1.170]
			4.55477e-303
Intercept	0.321786	**	0.157667	**
	[0.309 0.335]		[0.108 0.231]
	0		2.77476e-21
Serum vitamin D status
Deficiency (<25)	1.33755	**	1.14408
	[1.247 1.434]		[1.039 1.260]
	3.33905e-16		0.00625808
Insufficient (25-49)	1.13936	**	1.06284
	[1.086 1.195]		[0.998 1.132]
	9.84963e-08		0.058666
Age groups (quartiles)
59-65	0.761015	**	0.817891	**
	[0.720 0.804]		[0.761 0.879]
	5.13132e-22		5.04544e-08
66-70	0.544109	**	0.744809	**
	[0.512 0.578]		[0.679 0.817]
	1.43418e-84		4.12191e-10
71-81	0.384972	**	0.577024	**
	[0.358 0.414]		[0.512 0.651]
	1.65277e-150		2.61617e-19
Ethnicity: main groups
South Asian	0.615547	*	0.495399	*
	[0.438 0.865]		[0.320 0.766]
	0.00520136		0.00160963
African Caribbean	0.607206	**	0.387342	**
	[0.463 0.796]		[0.267 0.561]
	0.000301635		5.53969e-07
Chinese	0.516255	*	0.424345
	[0.324 0.823]		[0.223 0.809]
	0.00543706		0.00920509
Mixed or other	1.02141		0.863015
	[0.846 1.232]		[0.670 1.112]
	0.825028		0.254686
Assessment centre region
Midlands/Wales			0.996828
			[0.913 1.088]
			0.943347
North England			0.882068	**
			[0.826 0.942]
			0.00016525
Scotland			0.794665	**
			[0.704 0.897]
			0.000209795
season_visit
Spring			1.00531
			[0.929 1.088]
			0.895194
Autumn			1.03503
			[0.956 1.120]
			0.392785
Winter			0.935053
			[0.856 1.022]
			0.137373
BMI_category
Underweight			1.23768
			[0.918 1.668]
			0.161519
Overweight			1.03816
			[0.973 1.108]
			0.259846
Obesity			1.11509
			[1.028 1.210]
			0.00867471
Severe obesity			1.30917
			[1.074 1.596]
			0.00769652
At or above recommendation for moderate/vigorous activity
Low			0.77486
			[0.606 0.990]
			0.0416522
Moderate			0.717432
			[0.565 0.911]
			0.00634812
High			0.718497
			[0.565 0.913]
			0.00683418
Townsend deprivation index (most (1) - least (5) deprived)
2			0.898464
			[0.823 0.981]
			0.0172705
3			0.827676	**
			[0.755 0.907]
			5.19764e-05
4			0.810061	**
			[0.738 0.889]
			8.56717e-06
5			0.814338	**
			[0.742 0.893]
			1.3537e-05
Own or rent accomodation
Rent/mortgage payment			1.05451
			[0.987 1.127]
			0.117302
Rent from local authority			1.19202
			[0.986 1.440]
			0.0689569
Live in accomodation rent-free			1.11862
			[0.784 1.597]
			0.536931
None of the options			0.876702
			[0.530 1.450]
			0.608147
Population density
Rural			1.0034
			[0.903 1.115]
			0.949832
education_level_MHQ1
A levels/AS levels or equivalent			0.787137	**
			[0.711 0.871]
			3.62393e-06
O levels/GCSEs or equivalent			0.674266	**
			[0.620 0.733]
			1.49955e-20
CSEs or equivalent			0.546961	**
			[0.463 0.647]
			1.67127e-12
NVQ or HND or HNC or equivalent			0.760602	*
			[0.641 0.902]
			0.00170048
Other professional qualifications eg: nursing, teaching			0.768885	**
			[0.707 0.836]
			6.71544e-10
Employment status per MHQ1
Retired			1.01225
			[0.929 1.103]
			0.781894
Unemployed for various reasons			0.987841
			[0.893 1.093]
			0.812284
Other			1.05379
			[0.951 1.167]
			0.315027
Sexually abused as a child
Rarely/Sometimes			1.7325	**
			[1.591 1.887]
			1.68493e-36
Often/Very often			1.84053	**
			[1.474 2.298]
			7.16842e-08
Physically abused as a child
Rarely/Sometimes			1.451	**
			[1.346 1.564]
			2.70375e-22
Often/Very often			1.26995
			[1.013 1.592]
			0.0383137
Emotionally abused as a child
Rarely/Sometimes			2.00686	**
			[1.859 2.166]
			1.98553e-71
Often/Very often			3.12961	**
			[2.695 3.634]
			1.27045e-50
Adopted as a child
Yes			1.09666
			[0.861 1.396]
			0.454016
Risk taking behaviour
Yes			1.35692	**
			[1.269 1.451]
			3.36058e-19
Family/friend visits
Few times a year			0.832112
			[0.609 1.137]
			0.2479
Few times a week			0.719012
			[0.528 0.979]
			0.0360322
Almost daily			0.684775
			[0.497 0.943]
			0.0202222
Able to confide
Few times a year			0.813087	**
			[0.718 0.921]
			0.00114894
Few times a week			0.825704	**
			[0.742 0.919]
			0.000462574
Almost daily			0.679612	**
			[0.614 0.752]
			7.32002e-14
Pain at any site longer than 3m
Yes			1.1201	**
			[1.054 1.190]
			0.000253238
Bipolar disorder status
Bipolar 1 or 2			6.86585	**
			[5.308 8.881]
			9.84559e-49
Depression ever
1			4.41293	**
			[4.157 4.685]
			0
Schizophrenia diagnosis
Yes			5.17592	**
			[2.298 11.656]
			7.20801e-05
neuroticism			1.1757	**
			[1.165 1.187]
			3.12347e-247
Intercept	0.254838	**	0.142013	**
	[0.243 0.267]		[0.094 0.214]
	0		1.12527e-20
Serum vitamin D status
Deficiency (<25)	1.54453	**	1.21197
	[1.351 1.765]		[1.015 1.447]
	1.79377e-10		0.033625
Insufficient (25-49)	1.26388	**	1.1217
	[1.147 1.392]		[0.993 1.267]
	2.05619e-06		0.0642722
Age groups (quartiles)
59-65	0.596253	**	0.722247	**
	[0.537 0.662]		[0.633 0.824]
	4.7943e-22		1.21806e-06
66-70	0.326308	**	0.554401	**
	[0.286 0.372]		[0.461 0.667]
	1.67853e-63		4.66268e-10
71-81	0.214456	**	0.494521	**
	[0.182 0.253]		[0.386 0.634]
	5.79519e-76		2.7449e-08
Ethnicity: main groups
South Asian	0.621293		0.656236
	[0.328 1.175]		[0.335 1.286]
	0.143402		0.219975
African Caribbean	0.336173	*	0.141577	**
	[0.173 0.653]		[0.057 0.353]
	0.00130339		2.79433e-05
Chinese	0.420244		0.233533
	[0.155 1.137]		[0.056 0.979]
	0.0876744		0.0466834
Mixed or other	1.18842		0.724263
	[0.858 1.647]		[0.463 1.134]
	0.299401		0.15836
Assessment centre region
Midlands/Wales			1.03676
			[0.882 1.219]
			0.661698
North England			0.774923	**
			[0.683 0.879]
			7.47352e-05
Scotland			0.830968
			[0.666 1.037]
			0.10151
season_visit
Spring			1.06693
			[0.918 1.240]
			0.399461
Autumn			0.989253
			[0.848 1.154]
			0.89051
Winter			1.06914
			[0.905 1.263]
			0.43095
BMI_category
Underweight			1.74579
			[1.106 2.757]
			0.0168207
Overweight			0.884391
			[0.780 1.003]
			0.0555115
Obesity			0.946466
			[0.810 1.105]
			0.4873
Severe obesity			1.21108
			[0.854 1.717]
			0.28214
At or above recommendation for moderate/vigorous activity
Low			1.09389
			[0.646 1.853]
			0.738566
Moderate			1.23888
			[0.742 2.069]
			0.413114
High			1.29906
			[0.777 2.173]
			0.318928
Townsend deprivation index (most (1) - least (5) deprived)
2			0.91233
			[0.777 1.071]
			0.26206
3			0.843888
			[0.712 1.000]
			0.0496988
4			0.769707	*
			[0.646 0.917]
			0.00346206
5			0.684502	**
			[0.572 0.820]
			3.67979e-05
Own or rent accomodation
Rent/mortgage payment			1.19363
			[1.051 1.355]
			0.00633031
Rent from local authority			1.49635
			[1.103 2.030]
			0.00964015
Live in accomodation rent-free			1.18515
			[0.625 2.248]
			0.603128
None of the options			1.23311
			[0.549 2.770]
			0.61177
Population density
Rural			1.02987
			[0.839 1.265]
			0.778717
education_level_MHQ1
A levels/AS levels or equivalent			0.754972	*
			[0.625 0.912]
			0.00353023
O levels/GCSEs or equivalent			0.556646	**
			[0.471 0.658]
			6.47626e-12
CSEs or equivalent			0.586982	**
			[0.437 0.788]
			0.000381678
NVQ or HND or HNC or equivalent			0.521882	**
			[0.363 0.750]
			0.000440442
Other professional qualifications eg: nursing, teaching			0.66699	**
			[0.565 0.787]
			1.75964e-06
Employment status per MHQ1
Retired			0.892845
			[0.747 1.068]
			0.21443
Unemployed for various reasons			1.31944	**
			[1.119 1.556]
			0.00100695
Other			0.990202
			[0.820 1.196]
			0.918621
Sexually abused as a child
Rarely/Sometimes			2.34109	**
			[2.033 2.696]
			2.95011e-32
Often/Very often			2.93069	**
			[2.149 3.997]
			1.10732e-11
Physically abused as a child
Rarely/Sometimes			1.82008	**
			[1.598 2.073]
			1.63285e-19
Often/Very often			1.40055
			[0.999 1.963]
			0.0504397
Emotionally abused as a child
Rarely/Sometimes			2.32884	**
			[2.039 2.660]
			1.50269e-35
Often/Very often			3.85941	**
			[3.089 4.823]
			1.49964e-32
Adopted as a child
Yes			1.65906
			[1.137 2.421]
			0.00868178
Risk taking behaviour
Yes			1.34581	**
			[1.189 1.523]
			2.5732e-06
Family/friend visits
Few times a year			0.748578
			[0.468 1.197]
			0.227001
Few times a week			0.588589
			[0.370 0.936]
			0.0251109
Almost daily			0.613952
			[0.376 1.004]
			0.0517639
Able to confide
Few times a year			0.765379
			[0.614 0.954]
			0.017584
Few times a week			0.713425	**
			[0.590 0.863]
			0.000518782
Almost daily			0.582489	**
			[0.486 0.698]
			4.16781e-09
Pain at any site longer than 3m
Yes			1.092
			[0.974 1.225]
			0.133017
Bipolar disorder status
Bipolar 1 or 2			8.6043	**
			[6.036 12.266]
			1.21866e-32
Depression ever
1			3.80726	**
			[3.398 4.266]
			1.37379e-117
Schizophrenia diagnosis
Yes			1.65812
			[0.211 13.043]
			0.630854
neuroticism			1.20349	**
			[1.182 1.225]
			5.07038e-94
Intercept	0.0655532	**	0.022784	**
	[0.060 0.072]		[0.011 0.047]
	0		5.36966e-24
Serum vitamin D status
Deficiency (<25)	1.57562	**	1.15804
	[1.386 1.792]		[0.971 1.382]
	4.18529e-12		0.103134
Insufficient (25-49)	1.12182		1.01847
	[1.019 1.235]		[0.901 1.151]
	0.0187063		0.769453
Age groups (quartiles)
59-65	0.734285	**	0.86294
	[0.660 0.816]		[0.754 0.987]
	1.15223e-08		0.0317092
66-70	0.50666	**	0.823783
	[0.449 0.572]		[0.690 0.983]
	2.31557e-28		0.0314777
71-81	0.311434	**	0.611935	**
	[0.268 0.363]		[0.482 0.778]
	3.80955e-51		5.85314e-05
Ethnicity: main groups
South Asian	1.09824		0.736726
	[0.668 1.806]		[0.381 1.424]
	0.711991		0.3635
African Caribbean	1.0633		0.489004
	[0.711 1.591]		[0.289 0.828]
	0.765212		0.00774373
Chinese	0.335575		0.393074
	[0.107 1.053]		[0.117 1.323]
	0.0613655		0.131566
Mixed or other	1.51238		0.934469
	[1.120 2.041]		[0.624 1.399]
	0.00686698		0.742171
Assessment centre region
Midlands/Wales			1.17569
			[1.003 1.377]
			0.0451722
North England			0.816967	*
			[0.720 0.927]
			0.0017823
Scotland			0.789804
			[0.622 1.003]
			0.0525301
season_visit
Spring			1.07745
			[0.928 1.251]
			0.326287
Autumn			0.97114
			[0.833 1.133]
			0.708923
Winter			0.977268
			[0.826 1.157]
			0.789228
BMI_category
Underweight			1.48494
			[0.884 2.495]
			0.13536
Overweight			1.04475
			[0.921 1.185]
			0.4956
Obesity			1.01134
			[0.867 1.179]
			0.885595
Severe obesity			1.05157
			[0.743 1.488]
			0.77632
At or above recommendation for moderate/vigorous activity
Low			0.625376
			[0.421 0.929]
			0.0200643
Moderate			0.585918	*
			[0.401 0.857]
			0.00588113
High			0.602955
			[0.411 0.884]
			0.00949661
Townsend deprivation index (most (1) - least (5) deprived)
2			0.784394	*
			[0.670 0.918]
			0.00250806
3			0.677701	**
			[0.572 0.803]
			7.27403e-06
4			0.649955	**
			[0.546 0.774]
			1.30806e-06
5			0.513217	**
			[0.426 0.619]
			2.69924e-12
Own or rent accomodation
Rent/mortgage payment			1.12555
			[0.989 1.280]
			0.0722032
Rent from local authority			1.81369	**
			[1.395 2.358]
			8.61427e-06
Live in accomodation rent-free			1.32641
			[0.722 2.435]
			0.362153
None of the options			1.31178
			[0.598 2.876]
			0.497992
Population density
Rural			0.924947
			[0.740 1.155]
			0.491943
education_level_MHQ1
A levels/AS levels or equivalent			1.06359
			[0.889 1.273]
			0.501219
O levels/GCSEs or equivalent			0.78237	*
			[0.669 0.916]
			0.00221996
CSEs or equivalent			0.718995
			[0.540 0.957]
			0.0235835
NVQ or HND or HNC or equivalent			0.595171	*
			[0.422 0.839]
			0.00306816
Other professional qualifications eg: nursing, teaching			0.828962
			[0.706 0.974]
			0.0225303
Employment status per MHQ1
Retired			1.05151
			[0.888 1.245]
			0.560474
Unemployed for various reasons			1.46363	**
			[1.238 1.730]
			7.96612e-06
Other			1.10868
			[0.921 1.334]
			0.274991
Sexually abused as a child
Rarely/Sometimes			2.17635	**
			[1.888 2.508]
			7.06359e-27
Often/Very often			3.33141	**
			[2.522 4.400]
			2.32716e-17
Physically abused as a child
Rarely/Sometimes			1.96049	**
			[1.722 2.232]
			3.00359e-24
Often/Very often			1.83633	**
			[1.370 2.462]
			4.84767e-05
Emotionally abused as a child
Rarely/Sometimes			2.36332	**
			[2.064 2.706]
			1.40307e-35
Often/Very often			5.02994	**
			[4.100 6.170]
			3.66589e-54
Adopted as a child
Yes			2.20842	**
			[1.585 3.076]
			2.78602e-06
Risk taking behaviour
Yes			1.68901	**
			[1.498 1.904]
			1.12251e-17
Family/friend visits
Few times a year			0.643657
			[0.415 0.999]
			0.0493886
Few times a week			0.591061
			[0.384 0.910]
			0.0169031
Almost daily			0.499266	*
			[0.314 0.794]
			0.00330768
Able to confide
Few times a year			0.678335	**
			[0.548 0.840]
			0.000378096
Few times a week			0.647774	**
			[0.540 0.777]
			3.06163e-06
Almost daily			0.524269	**
			[0.441 0.623]
			2.21709e-13
Pain at any site longer than 3m
Yes			1.1416
			[1.019 1.279]
			0.0224314
Bipolar disorder status
Bipolar 1 or 2			14.5168	**
			[10.401 20.262]
			9.93378e-56
Depression ever
1			6.43132	**
			[5.702 7.253]
			4.92034e-202
Schizophrenia diagnosis
Yes			23.7714	**
			[10.062 56.159]
			5.06598e-13
neuroticism			1.21482	**
			[1.194 1.237]
			5.91751e-103
Intercept	0.058467	**	0.026134	**
	[0.053 0.064]		[0.014 0.049]
	0		3.56758e-30
Number of observations	77426		55810
AIC	161311		102735
BIC	161682		104842
** p<.00125, * p<.00625
