# Supplementary material
Source: Research Square preprint supplement (doi:10.21203/rs.3.rs-8873105/v1)
Supplement: Supplementary file 5 [file 2ecfafc1cbeaf138e91b72ae.xlsx]

## Sheet: ST14
Supplemental Table 14. Associations of natural logarithm of serum vitamin D level with suicide outcomes for MHQ2 participants.
	Passive suicidal ideation						Self-harm ideation						Self-harm behaviour						Suicide attempt
	Basic			Expanded			Basic			Expanded			Basic			Expanded			Basic			Expanded
	RRR	95% CI	P	RRR	95% CI	P	RRR	95% CI	P	RRR	95% CI	P	RRR	95% CI	P	RRR	95% CI	P	RRR	95% CI	P	RRR	95% CI	P
Natural logarithm of serum vitamin D	0.834606	[0.81 0.86]	5.13541e-29	0.869942	[0.83 0.91]	6.47602e-10	0.773789	[0.74 0.81]	5.01774e-35	0.828292	[0.78 0.88]	1.51708e-10	0.766829	[0.71 0.83]	5.7012e-12	0.848688	[0.77 0.94]	0.00166723	0.712578	[0.66 0.77]	1.74592e-20	0.841625	[0.76 0.93]	0.000718342
Sex (default: Female)
Male	0.709145	[0.69 0.73]	4.45577e-116	0.876558	[0.84 0.91]	2.72764e-11	0.638448	[0.61 0.66]	1.16561e-111	0.825629	[0.78 0.87]	4.84806e-13	0.470378	[0.43 0.51]	5.50227e-79	0.622524	[0.56 0.69]	5.9426e-21	0.504045	[0.47 0.54]	2.59701e-75	0.692119	[0.63 0.76]	5.76623e-14
Age	0.979073	[0.98 0.98]	1.79007e-102	0.995596	[0.99 1.00]	0.00598266	0.943772	[0.94 0.95]	0	0.967792	[0.96 0.97]	3.0454e-54	0.914135	[0.91 0.92]	6.16259e-282	0.939083	[0.93 0.95]	1.03813e-59	0.941734	[0.94 0.95]	2.52626e-149	0.983784	[0.98 0.99]	1.18921e-05
Ethnicity (default: White European)
South Asian	0.730837	[0.61 0.88]	0.00105565	0.742413	[0.59 0.94]	0.0134041	0.45967	[0.35 0.61]	7.03166e-08	0.480119	[0.34 0.68]	2.60316e-05	0.716865	[0.47 1.09]	0.122489	0.603711	[0.36 1.01]	0.0532528	0.713955	[0.47 1.08]	0.10926	0.662271	[0.40 1.09]	0.105735
African Caribbean	0.559131	[0.46 0.69]	2.19658e-08	0.519587	[0.40 0.67]	9.20901e-07	0.529615	[0.41 0.68]	6.16108e-07	0.346373	[0.25 0.49]	1.47564e-09	0.43953	[0.27 0.71]	0.000898709	0.267463	[0.15 0.49]	1.72463e-05	1.03333	[0.75 1.43]	0.842568	0.399324	[0.25 0.63]	0.000103047
Chinese	0.574783	[0.41 0.81]	0.00148158	0.427004	[0.26 0.71]	0.00107685	0.340634	[0.20 0.58]	9.37233e-05	0.305646	[0.15 0.63]	0.00122295	0.68412	[0.34 1.39]	0.293786	0.39915	[0.14 1.12]	0.0810233	0.572653	[0.27 1.22]	0.147211	0.696017	[0.29 1.65]	0.411661
Mixed or other	0.955557	[0.84 1.09]	0.50695	0.856486	[0.72 1.02]	0.0851959	0.947009	[0.80 1.12]	0.518314	0.775067	[0.62 0.97]	0.0231056	0.963593	[0.72 1.29]	0.802903	0.608983	[0.41 0.90]	0.012802	1.41833	[1.12 1.80]	0.00434128	0.904259	[0.65 1.25]	0.542418
Assessment centre region (default: South England/London)
Midlands/Wales				0.970195	[0.92 1.03]	0.286218				0.980383	[0.91 1.06]	0.596682				1.06112	[0.93 1.21]	0.361793				1.14114	[1.01 1.29]	0.0368532
North England				0.880278	[0.84 0.92]	1.13029e-09				0.910235	[0.86 0.96]	0.000652966				0.825043	[0.75 0.91]	0.000130421				0.83129	[0.75 0.92]	0.000195783
Scotland				0.850415	[0.79 0.92]	2.21022e-05				0.803001	[0.73 0.89]	2.28961e-05				0.787813	[0.66 0.94]	0.0101311				0.767595	[0.64 0.92]	0.00472351
Season of blood sample taken (default: Summer)
Spring				0.939618	[0.89 0.99]	0.0158979				0.892876	[0.84 0.95]	0.000855274				0.905144	[0.80 1.02]	0.102054				0.919069	[0.82 1.04]	0.165007
Autumn				1.00794	[0.96 1.06]	0.756749				0.973291	[0.91 1.04]	0.420047				0.920902	[0.82 1.04]	0.177541				1.09758	[0.98 1.23]	0.11809
Winter				0.950036	[0.90 1.00]	0.0717595				0.881222	[0.82 0.95]	0.000825693				0.941103	[0.82 1.07]	0.367451				1.00547	[0.88 1.15]	0.934652
BMI				0.996101	[0.99 1.00]	0.0636055				1.00604	[1.00 1.01]	0.0221268				0.987328	[0.98 1.00]	0.00766139				1.00054	[0.99 1.01]	0.902915
Physical activity (default: None)
Low				0.918783	[0.77 1.09]	0.337477				0.692247	[0.57 0.84]	0.000227874				0.706709	[0.49 1.01]	0.0601892				0.535011	[0.39 0.73]	5.7619e-05
Moderate				0.952223	[0.80 1.13]	0.570243				0.666666	[0.55 0.81]	2.89808e-05				0.773497	[0.54 1.10]	0.151232				0.546992	[0.41 0.73]	5.44759e-05
High				0.967477	[0.82 1.15]	0.702666				0.70351	[0.58 0.85]	0.000310754				0.774517	[0.54 1.10]	0.155912				0.59689	[0.44 0.80]	0.000592526
Townsend deprivation index (default: 1 [most deprived])
2				0.905245	[0.85 0.96]	0.000653181				0.900445	[0.84 0.97]	0.00560827				0.866101	[0.76 0.98]	0.0283382				0.841453	[0.74 0.95]	0.00620675
3				0.820803	[0.77 0.87]	4.62201e-11				0.843918	[0.78 0.91]	1.31857e-05				0.806084	[0.70 0.92]	0.00165095				0.697086	[0.61 0.80]	1.01718e-07
4				0.845898	[0.80 0.90]	2.1819e-08				0.799497	[0.74 0.86]	1.56006e-08				0.77909	[0.68 0.89]	0.000350262				0.651853	[0.57 0.75]	8.05365e-10
5				0.790252	[0.75 0.84]	4.54289e-15				0.809358	[0.75 0.87]	8.1723e-08				0.68452	[0.59 0.79]	1.42073e-07				0.580954	[0.50 0.67]	6.033e-14
Housing tenure (default: Own outright)
Rent/mortgage payment				0.991584	[0.95 1.03]	0.692274				1.05486	[1.00 1.11]	0.0587229				0.981099	[0.89 1.08]	0.708699				1.18217	[1.07 1.31]	0.00111824
Rent from local authority				1.04498	[0.91 1.20]	0.524238				1.25761	[1.07 1.47]	0.00445668				1.35814	[1.06 1.74]	0.0164789				2.17657	[1.77 2.67]	9.98077e-14
Live in accomodation rent-free				1.00661	[0.80 1.26]	0.954899				1.47097	[1.14 1.91]	0.00349817				1.08701	[0.66 1.80]	0.746504				1.89095	[1.24 2.88]	0.00288199
None of the options				1.17391	[0.86 1.60]	0.311636				1.31837	[0.91 1.92]	0.148353				1.35789	[0.75 2.47]	0.316315				1.9417	[1.13 3.34]	0.0164601
Population density (default:Urban)
Rural				0.946069	[0.89 1.01]	0.102475				0.982271	[0.90 1.07]	0.693268				0.892072	[0.75 1.06]	0.187891				0.968519	[0.82 1.15]	0.708293
Highest level of education attained (defauult: College or University degree)
A levels/AS levels or equivalent				0.92431	[0.87 0.99]	0.0170094				0.863464	[0.79 0.94]	0.000661993				0.817178	[0.70 0.95]	0.00776187				0.92021	[0.79 1.07]	0.268418
O levels/GCSEs or equivalent				0.836529	[0.79 0.88]	2.50904e-11				0.728464	[0.68 0.78]	2.62088e-18				0.592817	[0.52 0.68]	2.99445e-14				0.820817	[0.73 0.93]	0.00169248
CSEs or equivalent				0.760021	[0.69 0.84]	5.55438e-08				0.62288	[0.55 0.71]	1.69997e-12				0.584981	[0.47 0.73]	3.90148e-06				0.81373	[0.66 1.00]	0.0490578
NVQ or HND or HNC or equivalent				0.806436	[0.74 0.88]	2.95357e-06				0.670383	[0.59 0.76]	5.92567e-10				0.598848	[0.47 0.76]	3.86917e-05				0.659168	[0.53 0.83]	0.000294013
Other professional qualifications eg: nursing, teaching				0.892332	[0.85 0.94]	2.44023e-05				0.890557	[0.83 0.95]	0.00108795				0.740232	[0.65 0.85]	8.85503e-06				0.91533	[0.81 1.04]	0.163461
Employment status (default: Employed/student)
Retired				0.952257	[0.91 1.00]	0.0346312				0.987016	[0.93 1.05]	0.674292				0.953586	[0.85 1.07]	0.412796				1.02717	[0.92 1.15]	0.635568
Unemployed for various reasons				1.06167	[0.98 1.15]	0.126745				1.11757	[1.02 1.23]	0.0190991				1.27265	[1.10 1.47]	0.00105624				1.55711	[1.35 1.79]	6.31221e-10
Other				0.977629	[0.91 1.05]	0.533043				1.03676	[0.95 1.13]	0.418142				0.929123	[0.79 1.09]	0.356254				1.08186	[0.93 1.25]	0.298458
Sexually abused as a child (default: No)
Rarely/Sometimes				1.41362	[1.32 1.51]	5.02907e-25				1.89737	[1.76 2.05]	5.21021e-61				2.33507	[2.07 2.64]	4.90525e-43				2.34815	[2.09 2.64]	3.13841e-46
Often/Very often				1.31885	[1.12 1.55]	0.000727044				1.81005	[1.53 2.14]	6.46756e-12				2.51333	[1.99 3.18]	1.5959e-14				3.32465	[2.72 4.06]	9.18424e-32
Physically abused as a child (default: No)
Rarely/Sometimes				1.18722	[1.13 1.25]	2.30306e-11				1.3759	[1.29 1.46]	4.5111e-24				1.65578	[1.49 1.84]	2.60936e-21				1.50448	[1.36 1.67]	1.28204e-14
Often/Very often				0.99537	[0.86 1.15]	0.949849				1.2154	[1.04 1.42]	0.0142683				1.46197	[1.16 1.85]	0.00146816				1.7579	[1.44 2.14]	2.67089e-08
Emotionally abused as a child (default: No)
Rarely/Sometimes				1.80564	[1.71 1.90]	9.95246e-112				2.05977	[1.93 2.19]	6.14443e-111				2.24988	[2.02 2.50]	1.00078e-49				2.65985	[2.40 2.95]	8.50978e-75
Often/Very often				2.17221	[1.96 2.41]	8.99064e-50				2.99541	[2.68 3.35]	1.26533e-82				3.44369	[2.91 4.07]	3.83467e-47				4.51847	[3.88 5.27]	5.6083e-83
Adopted as a child (default: No)
Yes				1.07089	[0.91 1.26]	0.40415				1.23953	[1.02 1.50]	0.0297255				1.40295	[1.02 1.93]	0.0381267				1.54192	[1.15 2.07]	0.00389411
Risk taking behaviour (default: No)
Yes				1.12253	[1.08 1.17]	3.27352e-08				1.21676	[1.15 1.28]	4.29266e-13				1.21303	[1.10 1.33]	6.78737e-05				1.45439	[1.33 1.59]	6.42613e-16
Neuroticism				1.18289	[1.18 1.19]	0				1.1893	[1.18 1.20]	0				1.20439	[1.19 1.22]	7.4806e-156				1.21058	[1.19 1.23]	1.08065e-169
Family/friend visits (default: Never/no friends outside household)
Few times a year				0.892376	[0.75 1.06]	0.18755				0.815636	[0.67 1.00]	0.0497667				0.969605	[0.67 1.41]	0.87216				0.67756	[0.50 0.91]	0.00969852
Few times a week				0.832752	[0.70 0.98]	0.0319858				0.713432	[0.58 0.87]	0.000986225				0.806799	[0.56 1.17]	0.257892				0.585975	[0.44 0.78]	0.00029067
Almost daily				0.776827	[0.65 0.93]	0.00514076				0.658177	[0.53 0.82]	0.000138934				0.765181	[0.51 1.14]	0.187075				0.543353	[0.40 0.75]	0.000162937
Able to confide (default: Never)
Few times a year				1.01673	[0.94 1.09]	0.657045				0.951259	[0.87 1.05]	0.301133				1.02548	[0.86 1.22]	0.777031				0.763288	[0.65 0.90]	0.000913196
Few times a week				0.992707	[0.93 1.06]	0.821566				0.881463	[0.81 0.96]	0.00271263				1.03767	[0.89 1.21]	0.631298				0.727417	[0.63 0.83]	5.0796e-06
Almost daily				0.796316	[0.75 0.84]	6.93208e-15				0.726755	[0.67 0.78]	4.66179e-17				0.789036	[0.69 0.91]	0.000972833				0.594087	[0.52 0.67]	2.52828e-16
Pain at any site longer than 3 months (default: No)
Yes				1.08047	[1.04 1.12]	0.000120226				1.12781	[1.07 1.19]	4.25787e-06				1.05161	[0.96 1.15]	0.287412				1.07658	[0.98 1.18]	0.106676
Bipolar disorder status (default: No)
Bipolar 1 or 2				3.66708	[3.07 4.38]	6.27265e-47				7.71686	[6.45 9.24]	4.57373e-110				7.97489	[6.18 10.29]	2.22734e-57				17.6625	[14.13 22.07]	1.33605e-140
Depression ever (default: No)
Yes				3.38342	[3.24 3.53]	0				5.80204	[5.51 6.11]	0				4.43601	[4.05 4.86]	9.42594e-221				9.01201	[8.22 9.89]	0
Schizophrenia diagnosis (default: No)
Yes				1.93495	[1.11 3.37]	0.0199205				4.95257	[2.87 8.55]	9.01218e-09				3.7111	[1.42 9.67]	0.0073038				27.7945	[16.54 46.70]	3.57386e-36
Intercept	2.14632	[1.81 2.55]	3.13172e-18	0.347824	[0.24 0.51]	7.47218e-08	19.4557	[15.61 24.25]	7.90973e-154	1.3831	[0.85 2.24]	0.186939	46.5392	[30.78 70.38]	5.28653e-74	3.44259	[1.44 8.22]	0.00535104	9.35431	[6.34 13.79]	1.56374e-29	0.121803	[0.05 0.27]	3.50977e-07
Abbreviations: MHQ2: ‘Health and Wellbeing’ (Mental Health Questionnaire 2; 2022); RRR: relative risk ratio; CI: confidence interval
Note: Statistical significance at p<.0125; Nbasic = 149,688; Nexpanded = 110,301

## Sheet: metrics
Number of observations	149688		110301
AIC	265094		167844
BIC	265411		169920
** p<.0025, * p<.0125
