# Supplementary material
Source: Research Square preprint supplement (doi:10.21203/rs.3.rs-8873105/v1)
Supplement: Supplementary file 6 [file 31c83e90951033f9ec0bd617.xlsx]

## Sheet: ST9
Supplemental Table 9. Associations of vitamin D levels with suicide outcomes for male MHQ1 participants.
	Passive suicidal ideation						Self-harm ideation						Self-harm behaviour						Suicide attempt
	Basic			Expanded			Basic			Expanded			Basic			Expanded			Basic			Expanded
	RRR	95% CI	P	RRR	95% CI	P	RRR	95% CI	P	RRR	95% CI	P	RRR	95% CI	P	RRR	95% CI	P	RRR	95% CI	P	RRR	95% CI	P
Serum vitamin D status (default: Optimal)
Deficiency	1.32094	[1.23 1.42]	4.26103e-14	1.21166	[1.10 1.34]	0.00011457	1.48019	[1.35 1.62]	5.05039e-18	1.27569	[1.13 1.44]	0.000119507	1.62119	[1.33 1.97]	1.26044e-06	1.37004	[1.05 1.78]	0.0183288	1.78844	[1.48 2.16]	1.14262e-09	1.43953	[1.12 1.85]	0.00478242
Insufficiency	1.14488	[1.09 1.20]	3.30111e-08	1.1127	[1.05 1.18]	0.000836485	1.16651	[1.10 1.24]	1.11153e-06	1.10052	[1.01 1.19]	0.0219448	1.05667	[0.91 1.23]	0.470006	0.979833	[0.81 1.18]		1.33651	[1.16 1.53]	3.82687e-05	1.2052	[1.01 1.44]	0.039788
Age	0.969338	[0.97 0.97]	1.03138e-99	0.987578	[0.98 0.99]	2.3662e-07	0.945806	[0.94 0.95]	3.00065e-198	0.966124	[0.96 0.97]	1.06863e-28	0.90468	[0.90 0.91]	3.98039e-110	0.922493	[0.91 0.94]	8.01265e-31	0.941385	[0.93 0.95]	1.99397e-50	0.974005	[0.96 0.99]	5.50954e-05
Ethnicity (default: White European)
South Asian	0.693053	[0.54 0.88]	0.00311755	0.743662	[0.54 1.02]	0.0638685	0.439369	[0.31 0.62]	4.57461e-06	0.404211	[0.25 0.65]	0.000205533	0.538159	[0.27 1.06]	0.0724266	0.348884	[0.13 0.97]	0.0433345	0.365403	[0.16 0.83]	0.0155453	0.535531	[0.21 1.36]	0.190208
African Caribbean	0.610018	[0.46 0.81]	0.000670274	0.652776	[0.45 0.95]	0.0249811	0.276926	[0.17 0.45]	1.4425e-07	0.28977	[0.16 0.53]	5.00981e-05	0.144609	[0.04 0.58]	0.00661149	0.0854311	[0.01 0.62]	0.0153315	0.832533	[0.45 1.53]	0.556163	0.679603	[0.31 1.47]	0.328082
Chinese	0.568825	[0.31 1.05]	0.0699283	0.185318	[0.05 0.63]	0.00666223	0.429995	[0.19 0.99]	0.0474556	0.146417	[0.03 0.68]	0.0144785	0.373259	[0.05 2.70]	0.328837	0.347834	[0.04 2.94]	0.332501	0.359401	[0.05 2.59]	0.310076	0.297419	[0.03 2.63]	0.275489
Mixed or other	0.913494	[0.74 1.13]	0.408812	0.966012	[0.73 1.27]	0.804928	0.874306	[0.67 1.14]	0.317589	0.800164	[0.57 1.13]	0.207026	1.29978	[0.81 2.08]	0.275053	1.23575	[0.71 2.15]	0.454027	1.26905	[0.79 2.03]	0.318065	0.759696	[0.40 1.43]	0.393288
Assessment centre region (default: South England/London)
Midlands/Wales				0.953023	[0.88 1.04]	0.265274				0.9909	[0.89 1.11]	0.869964				0.95188	[0.74 1.22]	0.697403				1.07593	[0.86 1.35]	0.530494
North England				0.845991	[0.79 0.90]	2.54248e-07				0.854221	[0.79 0.93]	0.000191154				0.900687	[0.75 1.08]	0.265253				0.870068	[0.73 1.04]	0.125497
Scotland				0.906916	[0.81 1.02]	0.0977502				0.906603	[0.78 1.06]	0.207624				0.756087	[0.52 1.10]	0.141315				1.02503	[0.74 1.42]	0.880838
Season of blood sample taken (default: Summer)
Spring				0.936239	[0.87 1.01]	0.100141				0.866353	[0.78 0.96]	0.00590494				0.894034	[0.71 1.12]	0.333549				0.835027	[0.67 1.04]	0.105224
Autumn				0.981212	[0.91 1.06]	0.632346				0.978427	[0.89 1.08]	0.66848				0.871245	[0.69 1.09]	0.236933				0.998595	[0.81 1.24]	0.989716
Winter				0.981312	[0.90 1.07]	0.662178				0.89119	[0.80 1.00]	0.0417364				0.932347	[0.73 1.19]	0.578775				0.898189	[0.71 1.14]	0.370607
BMI				0.993262	[0.99 1.00]	0.0602352				0.997768	[0.99 1.01]	0.620686				0.984945	[0.97 1.00]	0.13332				1.00127	[0.98 1.02]	0.886426
Physical activity (default: None)
Low				0.87445	[0.69 1.11]	0.26987				0.736653	[0.56 0.97]	0.0324266				0.46238	[0.26 0.82]	0.0086515				0.638232	[0.38 1.06]	0.083438
Moderate				0.830747	[0.66 1.05]	0.118098				0.676446	[0.52 0.89]	0.0049				0.600307	[0.35 1.04]	0.0668525				0.636127	[0.39 1.04]	0.0697785
High				0.842456	[0.67 1.06]	0.151599				0.719611	[0.55 0.95]	0.0188238				0.710047	[0.41 1.23]	0.221817				0.760821	[0.47 1.24]	0.275791
Townsend deprivation index (default: 1 [most deprived])
2				0.894517	[0.82 0.98]	0.0134327				0.916797	[0.82 1.02]	0.126828				0.972399	[0.77 1.23]	0.81511				0.739467	[0.59 0.92]	0.00767601
3				0.834318	[0.76 0.91]	8.79789e-05				0.784498	[0.70 0.88]	4.77384e-05				0.847397	[0.66 1.09]	0.197606				0.626317	[0.49 0.80]	0.00012238
4				0.803811	[0.73 0.88]	2.33405e-06				0.742806	[0.66 0.84]	7.41453e-07				0.618399	[0.47 0.81]	0.000562839				0.386296	[0.29 0.51]	6.98468e-12
5				0.755156	[0.69 0.83]	1.23041e-09				0.748468	[0.67 0.84]	1.12666e-06				0.650356	[0.50 0.85]	0.00174346				0.493354	[0.38 0.64]	5.6468e-08
Housing tenure (default: Own outright)
Rent/mortgage payment				1.05495	[0.99 1.13]	0.109647				1.06048	[0.97 1.15]	0.175524				1.08872	[0.89 1.32]	0.396013				1.39791	[1.16 1.69]	0.000470295
Rent from local authority				1.16348	[0.95 1.43]	0.152623				1.17534	[0.92 1.50]	0.19602				2.0243	[1.33 3.08]	0.000976189				2.34706	[1.66 3.31]	1.17918e-06
Live in accomodation rent-free				1.11406	[0.82 1.51]	0.490447				1.10663	[0.75 1.63]	0.608638				0.993164	[0.40 2.50]	0.988362				1.16119	[0.49 2.74]	0.73247
None of the options				1.10012	[0.66 1.83]	0.714253				1.73029	[1.02 2.94]	0.042295				2.25209	[0.91 5.56]	0.0781755				2.14637	[0.83 5.56]	0.115846
Population density (default:Urban)
Rural				0.99619	[0.90 1.10]	0.942046				1.0506	[0.92 1.20]	0.472687				0.75762	[0.52 1.10]	0.140313				1.37887	[1.03 1.85]	0.0309928
Highest level of education attained (defauult: College or University degree)
A levels/AS levels or equivalent				1.01892	[0.92 1.13]	0.716379				0.864047	[0.76 0.99]	0.0322582				1.00901	[0.76 1.33]	0.949635				1.03448	[0.79 1.35]	0.805157
O levels/GCSEs or equivalent				0.910506	[0.84 0.99]	0.0316271				0.761481	[0.68 0.85]	2.98973e-06				0.920498	[0.72 1.17]	0.498251				1.01779	[0.81 1.28]	0.878706
CSEs or equivalent				0.855587	[0.73 1.01]	0.0604008				0.763751	[0.62 0.94]	0.00984254				0.637542	[0.41 1.00]	0.0494175				0.709811	[0.46 1.09]	0.117762
NVQ or HND or HNC or equivalent				0.782583	[0.70 0.88]	4.42865e-05				0.647308	[0.55 0.76]	1.54468e-07				0.392754	[0.24 0.63]	0.000114196				0.987991	[0.73 1.34]	0.937583
Other professional qualifications eg: nursing, teaching				0.882412	[0.81 0.96]	0.00312375				0.854003	[0.77 0.95]	0.00404727				0.774848	[0.60 1.01]	0.05477				0.891586	[0.70 1.13]	0.341817
Employment status (default: Employed/student)
Retired				0.910651	[0.84 0.98]	0.0168969				0.977574	[0.88 1.08]	0.668908				1.12639	[0.87 1.46]	0.362515				1.42365	[1.14 1.78]	0.00220175
Unemployed for various reasons				1.05348	[0.90 1.23]	0.511078				1.50645	[1.27 1.79]	3.28405e-06				1.17041	[0.82 1.68]	0.390126				2.52113	[1.91 3.33]	6.68875e-11
Other				0.936201	[0.85 1.03]	0.190182				1.11346	[0.99 1.25]	0.0769024				0.961134	[0.75 1.24]	0.758937				1.41685	[1.12 1.79]	0.00354462
Sexually abused as a child (default: No)
Rarely/Sometimes				1.41076	[1.26 1.58]	2.87636e-09				1.94458	[1.71 2.21]	8.75089e-24				2.35261	[1.82 3.04]	5.2648e-11				2.24104	[1.77 2.83]	1.69573e-11
Often/Very often				1.1641	[0.70 1.94]	0.561608				2.00468	[1.21 3.32]	0.00693449				2.51865	[1.11 5.72]	0.0273014				3.58962	[1.91 6.75]	7.15301e-05
Physically abused as a child (default: No)
Rarely/Sometimes				1.1615	[1.08 1.25]	3.31903e-05				1.3884	[1.27 1.51]	1.36097e-13				1.35309	[1.12 1.64]	0.00190779				1.35156	[1.13 1.62]	0.00121028
Often/Very often				1.5132	[1.16 1.98]	0.00230475				1.44136	[1.07 1.95]	0.0172623				1.92262	[1.18 3.14]	0.00915971				2.4997	[1.68 3.73]	7.09237e-06
Emotionally abused as a child (default: No)
Rarely/Sometimes				1.64193	[1.51 1.79]	1.32332e-29				1.92858	[1.74 2.14]	2.86894e-36				2.51231	[2.05 3.08]	1.30758e-18				2.57343	[2.12 3.13]	2.54616e-21
Often/Very often				1.79684	[1.44 2.24]	1.62093e-07				2.81572	[2.24 3.54]	7.8361e-19				3.52974	[2.40 5.19]	1.5836e-10				4.8124	[3.45 6.70]	1.53566e-20
Adopted as a child (default: No)
Yes				1.11214	[0.87 1.42]	0.38833				1.13795	[0.84 1.54]	0.402323				1.12253	[0.59 2.15]	0.727565				1.84358	[1.11 3.05]	0.0175347
Risk taking behaviour (default: No)
Yes				1.01099	[0.95 1.07]	0.714688				1.17661	[1.09 1.27]	2.06733e-05				1.23241	[1.04 1.46]	0.0140535				1.36215	[1.16 1.59]	0.00012169
Neuroticism				1.20396	[1.19 1.21]	0				1.20773	[1.19 1.22]	8.97037e-227				1.22717	[1.20 1.26]	1.3178e-57				1.22808	[1.20 1.26]	7.34905e-64
Family/friend visits (default: Never/no friends outside household)
Few times a year				0.813531	[0.66 1.00]	0.0533817				0.704523	[0.55 0.90]	0.00523821				0.887361	[0.52 1.51]	0.658759				0.611107	[0.40 0.93]	0.0210504
Few times a week				0.804019	[0.65 0.99]	0.0383303				0.619911	[0.49 0.79]	0.000109826				0.709439	[0.42 1.20]	0.199615				0.5523	[0.37 0.83]	0.00429329
Almost daily				0.709928	[0.56 0.90]	0.00396418				0.608016	[0.46 0.80]	0.000455766				0.582857	[0.31 1.09]	0.0910187				0.597451	[0.37 0.96]	0.0351988
Able to confide (default: Never)
Few times a year				0.894259	[0.81 0.99]	0.0335073				0.905782	[0.79 1.03]	0.144017				0.949529	[0.71 1.26]	0.722871				0.619172	[0.47 0.82]	0.000875594
Few times a week				0.877238	[0.80 0.96]	0.00476826				0.837639	[0.74 0.94]	0.00347124				0.940452	[0.73 1.21]	0.63739				0.839196	[0.67 1.06]	0.134914
Almost daily				0.699752	[0.65 0.75]	1.54059e-20				0.739501	[0.67 0.82]	1.48051e-09				0.714802	[0.57 0.89]	0.00275854				0.57201	[0.47 0.70]	3.15603e-08
Pain at any site longer than 3 months (default: No)
Yes				1.0653	[1.00 1.13]	0.0477449				1.10078	[1.02 1.19]	0.0192757				1.05181	[0.88 1.26]	0.585183				1.20333	[1.02 1.42]	0.0277162
Bipolar disorder status (default: No)
Bipolar 1 or 2				3.46751	[2.63 4.58]	1.88806e-18				7.35864	[5.57 9.72]	5.90235e-45				10.4923	[6.89 15.97]	5.37904e-28				20.1474	[13.86 29.29]	9.07527e-56
Depression ever (default: No)
Yes				3.32011	[3.10 3.56]	2.1769e-258				5.92022	[5.47 6.41]	0				4.89353	[4.11 5.83]	1.15657e-70				9.68083	[8.17 11.47]	2.39053e-152
Schizophrenia diagnosis (default: No)
Yes				3.17868	[1.65 6.14]	0.000570698				5.26125	[2.62 10.57]	3.09675e-06				11.4549	[4.65 28.21]	1.13874e-07				27.9078	[13.32 58.48]	1.14178e-18
Intercept	1.44485	[1.20 1.75]	0.000139249	0.465786	[0.29 0.75]	0.00183663	3.76651	[2.98 4.76]	1.14918e-28	0.91301	[0.51 1.65]	0.763247	9.11937	[5.32 15.64]	9.61107e-16	3.01138	[0.84 10.74]	0.0892892	0.85634	[0.52 1.42]	0.548525	0.0481445	[0.01 0.15]	3.47287e-07
Abbreviations: MHQ1: ‘Thoughts and Feelings’ (Mental Health Questionnaire 1; 2016); RRR: relative risk ratio; CI: confidence interval
Note: Statistical significance at p<.0125; Nbasic = 61,335; Nexpanded = 46,156

## Sheet: metrics
Number of observations	61335		46156
AIC	103600		67194.5
BIC	103889		69082.3
** p<.00125, * p<.00625
