# Supplementary material
Source: Research Square preprint supplement (doi:10.21203/rs.3.rs-8873105/v1)
Supplement: Supplementary file 7 [file 38b08d67944f33022fe7730d.xlsx]

## Sheet: ST13
Supplemental Table 13. Associations of natural logarithm of serum vitamin D level with suicide outcomes for MHQ1 participants.
	Passive suicidal ideation						Self-harm ideation						Self-harm behaviour						Suicide attempt
	Basic			Expanded			Basic			Expanded			Basic			Expanded			Basic			Expanded
	RRR	95% CI	P	RRR	95% CI	P	RRR	95% CI	P	RRR	95% CI	P	RRR	95% CI	P	RRR	95% CI	P	RRR	95% CI	P	RRR	95% CI	P
Natural logarithm of serum vitamin D	0.802669	[0.78 0.83]	1.01171e-42	0.853198	[0.82 0.89]	1.15828e-12	0.777801	[0.75 0.81]	7.99662e-38	0.858922	[0.81 0.91]	3.96142e-08	0.695224	[0.64 0.75]	1.62386e-19	0.796819	[0.72 0.89]	2.82101e-05	0.70831	[0.66 0.76]	1.18463e-18	0.849562	[0.77 0.94]	0.00223182
Sex (default: Female)
Male	0.728707	[0.71 0.75]	4.19977e-101	0.895781	[0.86 0.93]	1.7997e-08	0.667344	[0.64 0.69]	5.46481e-106	0.846637	[0.81 0.89]	1.61679e-11	0.50219	[0.46 0.54]	1.32011e-62	0.659504	[0.60 0.73]	1.37753e-15	0.555177	[0.51 0.60]	1.34039e-51	0.746663	[0.68 0.82]	7.91267e-09
Age	0.977475	[0.98 0.98]	6.63176e-127	0.991891	[0.99 1.00]	3.72445e-07	0.952045	[0.95 0.95]	0	0.972096	[0.97 0.98]	2.09125e-46	0.920305	[0.92 0.92]	2.78906e-240	0.946325	[0.94 0.95]	3.45302e-44	0.945379	[0.94 0.95]	5.94363e-124	0.976528	[0.97 0.98]	8.58346e-10
Ethnicity (default: White European)
South Asian	0.769004	[0.64 0.92]	0.00506135	0.77018	[0.61 0.97]	0.0263513	0.52026	[0.40 0.67]	4.76331e-07	0.444789	[0.32 0.62]	1.67792e-06	0.557555	[0.34 0.91]	0.01914	0.470083	[0.26 0.84]	0.010562	0.722735	[0.47 1.12]	0.148963	0.60916	[0.35 1.06]	0.0797595
African Caribbean	0.673232	[0.57 0.80]	9.27617e-06	0.611581	[0.48 0.77]	3.24259e-05	0.447947	[0.35 0.57]	4.88322e-11	0.341969	[0.25 0.47]	4.82289e-11	0.261252	[0.14 0.48]	1.13838e-05	0.128552	[0.06 0.29]	1.11076e-06	0.95839	[0.68 1.34]	0.804364	0.537848	[0.35 0.83]	0.00510696
Chinese	0.560825	[0.40 0.78]	0.000501853	0.384484	[0.24 0.63]	0.000117275	0.490056	[0.33 0.74]	0.000598694	0.341558	[0.19 0.62]	0.000394985	0.403388	[0.17 0.98]	0.045463	0.257704	[0.08 0.84]	0.0242185	0.335168	[0.12 0.90]	0.0305275	0.386599	[0.13 1.11]	0.0771565
Mixed or other	1.0121	[0.89 1.15]	0.854644	1.06705	[0.91 1.26]	0.439202	0.948494	[0.81 1.11]	0.501825	0.836427	[0.68 1.03]	0.089679	1.20391	[0.92 1.57]	0.175593	0.870779	[0.62 1.23]	0.435396	1.38264	[1.07 1.79]	0.0131	0.903018	[0.64 1.27]	0.55595
Assessment centre region (default: South England/London)
Midlands/Wales				0.947442	[0.90 1.00]	0.0549045				0.985258	[0.92 1.05]	0.670332				0.983359	[0.86 1.13]	0.808405				1.1296	[0.99 1.29]	0.066082
North England				0.857611	[0.82 0.89]	1.82263e-13				0.868728	[0.83 0.91]	6.88693e-08				0.800012	[0.72 0.89]	2.46062e-05				0.839299	[0.76 0.93]	0.000830412
Scotland				0.890546	[0.83 0.96]	0.00217323				0.838075	[0.76 0.92]	0.000279136				0.831794	[0.69 1.01]	0.0565317				0.85003	[0.70 1.03]	0.0989957
Season of blood sample taken (default: Summer)
Spring				0.930083	[0.88 0.98]	0.00453056				0.936457	[0.88 1.00]	0.0401863				0.966928	[0.85 1.10]	0.600783				0.97981	[0.87 1.11]	0.745187
Autumn				0.964207	[0.92 1.01]	0.149947				1.00508	[0.94 1.07]	0.872369				0.930953	[0.82 1.06]	0.270463				0.974764	[0.86 1.10]	0.686882
Winter				0.927217	[0.88 0.98]	0.00721861				0.909047	[0.85 0.97]	0.0072108				0.992962	[0.86 1.14]	0.920319				0.953729	[0.83 1.09]	0.497941
BMI				0.997033	[0.99 1.00]	0.151792				1.0045	[1.00 1.01]	0.0705033				0.994962	[0.99 1.00]	0.299758				0.999409	[0.99 1.01]	0.897471
Physical activity (default: None)
Low				0.957501	[0.81 1.13]	0.613044				0.733114	[0.61 0.88]	0.000973894				0.741551	[0.50 1.09]	0.127963				0.617438	[0.45 0.85]	0.00262477
Moderate				0.936775	[0.79 1.10]	0.436028				0.676896	[0.57 0.81]	1.99096e-05				0.888535	[0.61 1.29]	0.532931				0.588194	[0.43 0.80]	0.000577154
High				0.925485	[0.78 1.09]	0.358116				0.697338	[0.58 0.84]	8.96501e-05				0.987297	[0.68 1.43]	0.946449				0.636119	[0.47 0.86]	0.00351643
Townsend deprivation index (default: 1 [most deprived])
2				0.91754	[0.87 0.97]	0.00290047				0.895371	[0.84 0.96]	0.00172926				0.914897	[0.80 1.04]	0.187256				0.758294	[0.67 0.86]	2.27194e-05
3				0.862806	[0.81 0.91]	6.2277e-07				0.803243	[0.75 0.86]	2.49845e-09				0.827481	[0.72 0.95]	0.00826328				0.650199	[0.57 0.75]	1.00104e-09
4				0.822219	[0.78 0.87]	5.61566e-11				0.773577	[0.72 0.83]	4.74348e-12				0.715274	[0.62 0.83]	7.7355e-06				0.552556	[0.48 0.64]	1.22918e-15
5				0.793757	[0.75 0.84]	9.06968e-15				0.775493	[0.72 0.83]	5.605e-12				0.66397	[0.57 0.77]	7.35844e-08				0.499293	[0.43 0.58]	1.13251e-19
Housing tenure (default: Own outright)
Rent/mortgage payment				1.03899	[1.00 1.08]	0.0757775				1.04595	[0.99 1.10]	0.0935558				1.12486	[1.01 1.25]	0.0309244				1.19065	[1.07 1.32]	0.00129701
Rent from local authority				1.12023	[0.98 1.28]	0.0903566				1.20454	[1.04 1.40]	0.0148961				1.62795	[1.27 2.08]	9.8004e-05				2.03317	[1.65 2.50]	2.08217e-11
Live in accomodation rent-free				1.20163	[0.97 1.48]	0.0870042				1.09642	[0.84 1.42]	0.49018				1.0779	[0.64 1.82]	0.778597				1.24448	[0.76 2.03]	0.383187
None of the options				1.08977	[0.79 1.49]	0.593788				1.21021	[0.84 1.74]	0.300192				1.5705	[0.86 2.86]	0.140966				1.45862	[0.78 2.71]	0.232593
Population density (default:Urban)
Rural				1.0055	[0.94 1.07]	0.869457				1.0172	[0.94 1.11]	0.687248				0.966059	[0.81 1.15]	0.703571				1.05093	[0.88 1.25]	0.581124
Highest level of education attained (defauult: College or University degree)
A levels/AS levels or equivalent				0.955674	[0.90 1.02]	0.164192				0.822257	[0.76 0.89]	2.00074e-06				0.82467	[0.71 0.96]	0.0158433				1.07104	[0.92 1.24]	0.366176
O levels/GCSEs or equivalent				0.850067	[0.81 0.90]	9.97913e-10				0.71249	[0.67 0.76]	3.56864e-23				0.66142	[0.58 0.76]	3.17385e-09				0.864392	[0.76 0.98]	0.0260003
CSEs or equivalent				0.813	[0.74 0.90]	5.47951e-05				0.628222	[0.55 0.71]	1.86899e-12				0.621502	[0.49 0.79]	0.000134256				0.707318	[0.56 0.90]	0.00455063
NVQ or HND or HNC or equivalent				0.770161	[0.70 0.84]	1.62541e-08				0.68606	[0.61 0.77]	2.34633e-10				0.447408	[0.34 0.60]	3.6216e-08				0.760158	[0.61 0.95]	0.0159922
Other professional qualifications eg: nursing, teaching				0.875939	[0.83 0.92]	6.99031e-07				0.802227	[0.75 0.86]	5.80006e-11				0.710021	[0.62 0.82]	1.5186e-06				0.854868	[0.75 0.98]	0.0205918
Employment status (default: Employed/student)
Retired				0.981237	[0.93 1.03]	0.458448				0.991314	[0.93 1.06]	0.791216				0.98706	[0.86 1.14]	0.855526				1.16868	[1.02 1.33]
Unemployed for various reasons				1.0503	[0.98 1.13]	0.190717				1.07175	[0.98 1.17]	0.118307				1.28439	[1.11 1.49]	0.00098868				1.6882	[1.46 1.95]
Other				1.00108	[0.94 1.07]	0.974228				1.08912	[1.01 1.18]	0.0302232				1.00637	[0.87 1.17]	0.934197				1.22588	[1.06 1.42]	0.00556611
Sexually abused as a child (default: No)
Rarely/Sometimes				1.36571	[1.28 1.46]	1.20508e-21				1.79469	[1.67 1.93]	6.64835e-58				2.34752	[2.08 2.66]	5.41429e-42				2.20845	[1.96 2.49]	1.40484e-37
Often/Very often				1.199	[0.98 1.47]	0.0822503				1.84351	[1.50 2.26]	4.34809e-09				2.86186	[2.14 3.82]	9.56914e-13				3.42016	[2.65 4.41]	1.96159e-21
Physically abused as a child (default: No)
Rarely/Sometimes				1.20695	[1.15 1.27]	1.8556e-14				1.41131	[1.33 1.49]	8.49216e-33				1.62183	[1.46 1.80]	7.69956e-19				1.71086	[1.54 1.90]	1.27252e-23
Often/Very often				1.37954	[1.17 1.63]	0.000157134				1.32976	[1.11 1.59]	0.00197108				1.54422	[1.17 2.04]	0.00209348				2.04165	[1.61 2.58]	3.00627e-09
Emotionally abused as a child (default: No)
Rarely/Sometimes				1.663	[1.58 1.75]	7.28579e-79				1.98319	[1.87 2.11]	1.18931e-106				2.37312	[2.12 2.65]	4.65744e-52				2.43372	[2.18 2.72]	8.55973e-56
Often/Very often				1.97745	[1.75 2.23]	3.59165e-28				3.05789	[2.70 3.46]	6.21218e-69				3.84483	[3.17 4.66]	6.56953e-43				4.88346	[4.10 5.81]	1.4976e-71
Adopted as a child (default: No)
Yes				1.02986	[0.88 1.21]	0.71684				1.10692	[0.92 1.34]	0.291352				1.49289	[1.08 2.06]	0.0145426				2.05576	[1.56 2.71]	2.66995e-07
Risk taking behaviour (default: No)
Yes				1.13125	[1.09 1.18]	2.54609e-09				1.26702	[1.21 1.33]	9.16605e-21				1.27857	[1.16 1.41]	1.12338e-06				1.55232	[1.41 1.71]	1.14039e-19
Neuroticism				1.17836	[1.17 1.19]	0				1.18942	[1.18 1.20]	0				1.21141	[1.19 1.23]	6.0583e-150				1.22119	[1.20 1.24]	5.45737e-168
Family/friend visits (default: Never/no friends outside household)
Few times a year				0.853352	[0.72 1.01]	0.0670985				0.743728	[0.61 0.90]	0.00248522				0.779865	[0.55 1.10]	0.15822				0.605383	[0.45 0.82]	0.0010444
Few times a week				0.827129	[0.70 0.98]	0.0265595				0.647471	[0.54 0.78]	6.86518e-06				0.614683	[0.44 0.86]	0.00518352				0.55372	[0.41 0.74]	8.01016e-05
Almost daily				0.817964	[0.69 0.98]	0.0261058				0.625605	[0.51 0.77]	5.74235e-06				0.608201	[0.42 0.88]	0.0087808				0.49601	[0.36 0.69]	2.4734e-05
Able to confide (default: Never)
Few times a year				0.916208	[0.85 0.98]	0.0171674				0.857671	[0.78 0.94]	0.000818812				0.848631	[0.71 1.01]	0.0636392				0.67409	[0.57 0.80]	3.94179e-06
Few times a week				0.857484	[0.81 0.91]	1.52695e-06				0.844614	[0.78 0.91]	1.98439e-05				0.797597	[0.69 0.93]	0.00333628				0.711751	[0.62 0.82]	2.23536e-06
Almost daily				0.71263	[0.67 0.75]	1.84062e-32				0.705475	[0.66 0.76]	1.20473e-22				0.627451	[0.55 0.72]	4.63184e-11				0.549131	[0.48 0.62]	8.47125e-20
Pain at any site longer than 3 months (default: No)
Yes				1.07518	[1.03 1.12]	0.000297583				1.11457	[1.06 1.17]	1.14371e-05				1.09153	[0.99 1.20]	0.0761031				1.17328	[1.07 1.29]	0.000784873
Bipolar disorder status (default: No)
Bipolar 1 or 2				3.70465	[3.07 4.46]	5.06992e-43				7.22251	[5.98 8.72]	1.17868e-93				9.36483	[7.14 12.28]	5.71695e-59				16.8068	[13.11 21.55]	8.25196e-110
Depression ever (default: No)
Yes				2.90272	[2.79 3.02]	0				4.9332	[4.70 5.18]	0				4.16383	[3.79 4.58]	5.02092e-189				7.44351	[6.75 8.21]	0
Schizophrenia diagnosis (default: No)
Yes				2.43775	[1.43 4.17]	0.00112688				5.27123	[3.10 8.97]	9.13401e-10				7.25506	[3.34 15.75]	5.37457e-07				25.9201	[14.83 45.30]	3.04474e-30
Intercept	2.91884	[2.49 3.43]	5.04834e-39	0.621397	[0.43 0.90]	0.0127127	10.8199	[8.91 13.14]	1.0239e-127	1.2531	[0.80 1.95]	0.319199	27.8496	[18.65 41.59]	2.00592e-59	1.70487	[0.72 4.06]	0.227923	5.28328	[3.58 7.79]	4.18411e-17	0.172915	[0.08 0.39]	2.63819e-05
Abbreviations: MHQ1: ‘Thoughts and Feelings’ (Mental Health Questionnaire 1; 2016); RRR: relative risk ratio; CI: confidence interval
Note: Statistical significance at p<.0125; Nbasic = 138,546; Nexpanded = 101,815

## Sheet: metrics
Number of observations	138546		101815
AIC	264311		169646
BIC	264626		171705
** p<.0025, * p<.0125
