# Supplementary material
Source: Research Square preprint supplement (doi:10.21203/rs.3.rs-8873105/v1)
Supplement: Supplementary file 8 [file 76328358cd6e694b139f93fe.xlsx]

## Sheet: ST4
Supplemental Table 4. Associations of vitamin D levels with suicide outcomes for MHQ1 participants.
	Passive suicidal ideation						Self-harm ideation						Self-harm behaviour						Suicide attempt
	Basic			Expanded			Basic			Expanded			Basic			Expanded			Basic			Expanded
	RRR	95% CI	P	RRR	95% CI	P	RRR	95% CI	P	RRR	95% CI	P	RRR	95% CI	P	RRR	95% CI	P	RRR	95% CI	P	RRR	95% CI	P
Serum vitamin D status (default: Optimal)
Deficiency	1.3001	[1.24 1.36]	2.95903e-29	1.19043	[1.12 1.27]	3.33596e-08	1.39121	[1.32 1.47]	4.79921e-32	1.20135	[1.11 1.30]	2.2235e-06	1.57599	[1.41 1.76]	6.24084e-16	1.27335	[1.10 1.47]	0.00119822	1.64679	[1.48 1.83]	2.00628e-20	1.24817	[1.08 1.44]	0.00252956
Insufficiency	1.12825	[1.09 1.16]	1.04586e-14	1.08736	[1.05 1.13]	3.5966e-05	1.15171	[1.11 1.20]	2.85014e-13	1.07876	[1.03 1.13]	0.00292583	1.20378	[1.11 1.31]	7.49394e-06	1.07514	[0.97 1.19]	0.16303	1.18678	[1.10 1.28]	1.8735e-05	1.07385	[0.97 1.19]	0.163839
Sex (default: Female)
Male	0.728807	[0.71 0.75]	2.62688e-101	0.895791	[0.86 0.93]	1.72277e-08	0.665463	[0.64 0.69]	1.43692e-107	0.844168	[0.80 0.89]	6.83281e-12	0.501222	[0.46 0.54]	4.1412e-63	0.655899	[0.59 0.73]	5.82389e-16	0.554542	[0.51 0.60]	4.89178e-52	0.746554	[0.68 0.82]	7.19242e-09
Age	0.977268	[0.98 0.98]	1.16142e-129	0.991779	[0.99 0.99]	2.45591e-07	0.952087	[0.95 0.95]	0	0.97227	[0.97 0.98]	6.0952e-46	0.919783	[0.92 0.92]	3.25872e-244	0.945929	[0.94 0.95]	6.11843e-45	0.945185	[0.94 0.95]	2.03269e-125	0.976558	[0.97 0.98]	8.08249e-10
Ethnicity (default: White European)
South Asian	0.802955	[0.68 0.96]	0.0131714	0.799869	[0.64 1.00]	0.0475344	0.519484	[0.41 0.66]	1.42348e-07	0.451255	[0.33 0.62]	1.1602e-06	0.577544	[0.36 0.92]	0.0201629	0.493518	[0.28 0.86]	0.0131051	0.70676	[0.46 1.08]	0.106974	0.615277	[0.36 1.05]	0.0760538
African Caribbean	0.672382	[0.56 0.80]	8.40994e-06	0.608684	[0.48 0.77]	2.67585e-05	0.468803	[0.37 0.59]	2.16555e-10	0.358039	[0.26 0.49]	1.24069e-10	0.261112	[0.14 0.48]	1.12346e-05	0.127171	[0.06 0.29]	9.81802e-07	0.938997	[0.67 1.31]	0.713606	0.519535	[0.34 0.80]	0.00315868
Chinese	0.564202	[0.41 0.78]	0.000568323	0.386264	[0.24 0.63]	0.000125029	0.492869	[0.33 0.74]	0.000658262	0.34374	[0.19 0.62]	0.000419924	0.408635	[0.17 0.99]	0.0485909	0.264058	[0.08 0.86]	0.0268319	0.336695	[0.13 0.91]	0.0312167	0.386496	[0.13 1.11]	0.0772068
Mixed or other	1.0237	[0.90 1.16]	0.718512	1.07792	[0.92 1.27]	0.366114	0.953908	[0.82 1.11]	0.545182	0.842477	[0.69 1.03]	0.0998439	1.18816	[0.91 1.55]	0.208035	0.861113	[0.61 1.22]	0.398882	1.38948	[1.08 1.79]	0.0106382	0.87679	[0.62 1.23]	0.446745
Assessment centre region (default: South England/London)
Midlands/Wales				0.947899	[0.90 1.00]	0.0567246				0.992929	[0.93 1.06]	0.838499				1.00033	[0.87 1.15]	0.996125				1.13842	[1.00 1.30]	0.0497325
North England				0.857353	[0.82 0.89]	1.53409e-13				0.872114	[0.83 0.92]	1.5325e-07				0.805037	[0.73 0.89]	4.10028e-05				0.836906	[0.76 0.93]	0.000672311
Scotland				0.895079	[0.83 0.96]	0.00323874				0.840473	[0.76 0.92]	0.000333478				0.825888	[0.68 1.00]	0.0481359				0.859171	[0.71 1.04]	0.120016
Season of blood sample taken (default: Summer)
Spring				0.945681	[0.90 0.99]	0.0274665				0.949705	[0.89 1.01]	0.104303				0.99345	[0.88 1.13]	0.918072				0.98976	[0.88 1.12]	0.868771
Autumn				0.967654	[0.92 1.02]	0.194208				1.01029	[0.95 1.07]	0.745496				0.944639	[0.83 1.07]	0.380229				0.971089	[0.86 1.10]	0.643659
Winter				0.941377	[0.89 0.99]	0.0302539				0.918087	[0.86 0.98]	0.0152692				1.01889	[0.89 1.17]	0.789717				0.951884	[0.83 1.09]	0.477807
BMI				0.998011	[0.99 1.00]	0.333572				1.00519	[1.00 1.01]	0.03579				0.996316	[0.99 1.01]	0.445684				1.00041	[0.99 1.01]	0.92897
Physical activity (default: None)
Low				0.945913	[0.80 1.12]	0.513154				0.740891	[0.62 0.89]	0.00139371				0.75567	[0.51 1.11]					0.609117	[0.45 0.83]	0.00172284
Moderate				0.922064	[0.78 1.08]	0.328312				0.682021	[0.57 0.82]	2.71251e-05				0.898602	[0.62 1.30]					0.578681	[0.43 0.78]	0.000321419
High				0.909368	[0.77 1.07]	0.25476				0.70156	[0.59 0.84]	0.00011177				0.992003	[0.68 1.44]					0.628719	[0.47 0.85]	0.00239664
Townsend deprivation index (default: 1 [most deprived])
2				0.920804	[0.87 0.97]	0.00423318				0.898084	[0.84 0.96]	0.00227133				0.914487	[0.80 1.04]	0.184297				0.763697	[0.67 0.87]	3.50934e-05
3				0.864847	[0.82 0.92]	9.02951e-07				0.803018	[0.75 0.86]	2.30999e-09				0.828919	[0.72 0.95]	0.0087122				0.654217	[0.57 0.75]	1.6e-09
4				0.825984	[0.78 0.88]	1.42494e-10				0.774529	[0.72 0.83]	5.60784e-12				0.707975	[0.61 0.82]	4.07048e-06				0.551643	[0.48 0.64]	1.01355e-15
5				0.792839	[0.75 0.84]	6.27365e-15				0.775187	[0.72 0.83]	4.94414e-12				0.658715	[0.57 0.76]	4.0503e-08				0.503859	[0.43 0.59]	2.68748e-19
Housing tenure (default: Own outright)
Rent/mortgage payment				1.03738	[0.99 1.08]	0.0879539				1.04871	[1.00 1.11]	0.0755498				1.12723	[1.01 1.25]	0.0279565				1.19211	[1.07 1.33]	0.00117638
Rent from local authority				1.12602	[0.99 1.28]	0.0749988				1.2064	[1.04 1.40]	0.0136575				1.61459	[1.26 2.06]	0.000127961				2.02884	[1.65 2.49]	2.01425e-11
Live in accomodation rent-free				1.20953	[0.98 1.49]	0.0754729				1.09846	[0.85 1.43]	0.481195				1.08134	[0.64 1.82]	0.769444				1.24206	[0.76 2.03]	0.38736
None of the options				1.0874	[0.79 1.49]	0.602906				1.20876	[0.84 1.73]	0.303196				1.56143	[0.86 2.85]	0.146491				1.55076	[0.85 2.83]	0.153282
Population density (default:Urban)
Rural				1.0042	[0.94 1.07]	0.899871				1.01636	[0.94 1.10]	0.701706				0.958229	[0.80 1.15]	0.63919				1.04737	[0.88 1.25]	0.607155
Highest level of education attained (defauult: College or University degree)
A levels/AS levels or equivalent				0.954422	[0.90 1.02]	0.151379				0.8165	[0.75 0.89]	8.35193e-07				0.82609	[0.71 0.97]	0.0163787				1.06384	[0.92 1.23]	0.414426
O levels/GCSEs or equivalent				0.847136	[0.80 0.89]	4.18242e-10				0.707933	[0.66 0.76]	5.29863e-24				0.658576	[0.57 0.75]	2.06369e-09				0.865623	[0.76 0.98]	0.027025
CSEs or equivalent				0.815668	[0.74 0.90]	6.79511e-05				0.623895	[0.55 0.71]	9.02745e-13				0.606245	[0.47 0.77]	6.40664e-05				0.716356	[0.57 0.91]	0.00584895
NVQ or HND or HNC or equivalent				0.76568	[0.70 0.84]	7.76111e-09				0.685614	[0.61 0.77]	2.07425e-10				0.445442	[0.33 0.59]	3.0575e-08				0.754016	[0.60 0.94]	0.0132239
Other professional qualifications eg: nursing, teaching				0.873731	[0.83 0.92]	4.16596e-07				0.801267	[0.75 0.86]	4.28559e-11				0.704335	[0.61 0.81]	8.80291e-07				0.848569	[0.74 0.97]	0.0152981
Employment status (default: Employed/student)
Retired				0.978528	[0.93 1.03]	0.394781				0.992648	[0.93 1.06]	0.822553				0.98156	[0.85 1.13]	0.794572				1.16361	[1.02 1.33]	0.0233518
Unemployed for various reasons				1.04879	[0.97 1.13]	0.203382				1.08083	[0.99 1.18]	0.0788487				1.28551	[1.11 1.49]	0.000931495				1.66808	[1.45 1.92]	1.56302e-12
Other				1.0008	[0.94 1.07]	0.980824				1.08814	[1.01 1.18]	0.0319662				1.00646	[0.87 1.17]	0.933161				1.23258	[1.07 1.42]	0.00425583
Sexually abused as a child (default: No)
Rarely/Sometimes				1.36689	[1.28 1.46]	7.53545e-22				1.79177	[1.67 1.92]	8.90532e-58				2.34644	[2.07 2.65]	4.29387e-42				2.2093	[1.96 2.49]	7.18088e-38
Often/Very often				1.19635	[0.98 1.47]	0.0853821				1.85675	[1.52 2.28]	2.45832e-09				2.83342	[2.12 3.78]	1.58309e-12				3.3439	[2.59 4.31]	1.0597e-20
Physically abused as a child (default: No)
Rarely/Sometimes				1.2101	[1.15 1.27]	7.22511e-15				1.41325	[1.34 1.50]	4.04358e-33				1.62198	[1.46 1.80]	6.95739e-19				1.70606	[1.54 1.89]	1.813e-23
Often/Very often				1.38283	[1.17 1.63]	0.000137192				1.33508	[1.11 1.60]	0.0016743				1.54223	[1.17 2.03]	0.00214968				2.05393	[1.62 2.60]	1.89381e-09
Emotionally abused as a child (default: No)
Rarely/Sometimes				1.66303	[1.58 1.75]	4.11866e-79				1.98194	[1.86 2.11]	1.07925e-106				2.38702	[2.14 2.67]	6.49258e-53				2.43766	[2.18 2.72]	3.45552e-56
Often/Very often				1.96693	[1.74 2.22]	7.76625e-28				3.03098	[2.68 3.43]	5.59381e-68				3.83996	[3.17 4.65]	7.05326e-43				4.92093	[4.14 5.85]	9.9821e-73
Adopted as a child (default: No)
Yes				1.03667	[0.88 1.21]	0.65583				1.10548	[0.92 1.33]	0.297257				1.45303	[1.05 2.01]	0.0240767				2.04711	[1.56 2.69]	3.12741e-07
Risk taking behaviour (default: No)
Yes				1.12748	[1.08 1.17]	6.51103e-09				1.26533	[1.20 1.33]	1.39309e-20				1.27605	[1.16 1.41]	1.34137e-06				1.54596	[1.41 1.70]	2.1343e-19
Neuroticism				1.17855	[1.17 1.19]	0				1.18914	[1.18 1.20]	0				1.21236	[1.20 1.23]	2.24172e-151				1.22131	[1.20 1.24]	6.53673e-169
Family/friend visits (default: Never/no friends outside household)
Few times a year				0.851533	[0.72 1.01]	0.0614999				0.752828	[0.62 0.91]	0.0035928				0.791511	[0.56 1.12]	0.184299				0.605542	[0.45 0.82]	0.000952172
Few times a week				0.823713	[0.70 0.97]	0.0223792				0.653528	[0.54 0.79]	9.95941e-06				0.623639	[0.44 0.88]	0.00665482				0.552603	[0.41 0.74]	6.55596e-05
Almost daily				0.817068	[0.69 0.97]	0.0242774				0.628158	[0.51 0.77]	6.46797e-06				0.619975	[0.43 0.90]	0.0116817				0.496134	[0.36 0.69]	2.16475e-05
Able to confide (default: Never)
Few times a year				0.915031	[0.85 0.98]	0.0153603				0.855383	[0.78 0.94]	0.000649026				0.841739	[0.71 1.00]	0.0513665				0.671329	[0.57 0.79]	3.06226e-06
Few times a week				0.855442	[0.80 0.91]	9.99743e-07				0.842991	[0.78 0.91]	1.55301e-05				0.79243	[0.68 0.92]	0.0025134				0.719502	[0.63 0.83]	4.43879e-06
Almost daily				0.711333	[0.67 0.75]	6.23905e-33				0.705164	[0.66 0.76]	9.11597e-23				0.626726	[0.55 0.72]	3.83573e-11				0.55235	[0.49 0.63]	1.69248e-19
Pain at any site longer than 3 months (default: No)
Yes				1.07633	[1.03 1.12]	0.000236049				1.11385	[1.06 1.17]	1.26248e-05				1.08541	[0.99 1.20]	0.0968727				1.16953	[1.07 1.28]	0.000977736
Bipolar disorder status (default: No)
Bipolar 1 or 2				3.67098	[3.05 4.42]	1.55346e-42				7.19894	[5.96 8.69]	1.04556e-93				9.3526	[7.14 12.25]	2.53614e-59				16.7905	[13.11 21.50]	1.139e-110
Depression ever (default: No)
Yes				2.89504	[2.78 3.02]	0				4.92749	[4.70 5.17]	0				4.1546	[3.78 4.57]	1.38719e-188				7.43228	[6.74 8.20]	0
Schizophrenia diagnosis (default: No)
Yes				2.4574	[1.44 4.20]	0.00101329				5.51367	[3.26 9.34]	2.15124e-10				7.34007	[3.38 15.93]	4.58571e-07				26.9926	[15.52 46.96]	1.914e-31
Intercept	1.18269	[1.05 1.34]	0.00665295	0.319308	[0.23 0.44]	1.12797e-11	3.76271	[3.25 4.35]	1.45003e-71	0.630994	[0.43 0.93]	0.0195401	6.36031	[4.70 8.60]	2.92642e-33	0.64621	[0.30 1.38]	0.257275	1.26715	[0.95 1.70]	0.112597	0.0862034	[0.04 0.17]	4.9931e-12
Abbreviations: MHQ1: ‘Thoughts and Feelings’ (Mental Health Questionnaire 1; 2016); RRR: relative risk ratio; CI: confidence interval
Note: Statistical significance at p<.0125; Nbasic = 138,778; Nexpanded = 101,984

## Sheet: metrics
Number of observations	138778		101984
AIC	265002		170022
BIC	265356		172119
** p<.0025, * p<.0125
