# Supplementary material
Source: Research Square preprint supplement (doi:10.21203/rs.3.rs-8873105/v1)
Supplement: Supplementary file 9 [file 795e345a93559e538e47eb32.xlsx]

## Sheet: ST5
Supplemental Table 5. Associations of vitamin D levels with suicide outcomes for MHQ2 participants.
	Passive suicidal ideation						Self-harm ideation						Self-harm behaviour						Suicide attempt
	Basic			Expanded			Basic			Expanded			Basic			Expanded			Basic			Expanded
	RRR	95% CI	P	RRR	95% CI	P	RRR	95% CI	P	RRR	95% CI	P	RRR	95% CI	P	RRR	95% CI	P	RRR	95% CI	P	RRR	95% CI	P
Serum vitamin D status (default: Optimal)
Deficiency	1.25555	[1.20 1.32]	6.16857e-22	1.17554	[1.10 1.25]	4.19524e-07	1.36824	[1.29 1.45]	9.16357e-26	1.24578	[1.15 1.35]	9.58012e-08	1.43409	[1.29 1.60]	3.1177e-11	1.21216	[1.05 1.40]	0.00806191	1.65023	[1.50 1.82]	2.08122e-23	1.29596	[1.13 1.49]	0.000215773
Insufficiency	1.11223	[1.08 1.15]	1.07448e-11	1.07147	[1.03 1.12]	0.000729043	1.16257	[1.12 1.21]	2.60019e-13	1.10928	[1.05 1.17]	0.000132565	1.14764	[1.06 1.24]	0.000429844	1.08483	[0.99 1.19]	0.0970915	1.18757	[1.10 1.28]	4.1495e-06	1.0785	[0.98 1.19]	0.119034
Sex (default: Female)
Male	0.708514	[0.69 0.73]	7.19618e-117	0.87654	[0.84 0.91]	2.5939e-11	0.638382	[0.61 0.66]	4.6664e-112	0.825493	[0.78 0.87]	4.36077e-13	0.472365	[0.44 0.51]	1.83098e-78	0.624802	[0.57 0.69]	9.98411e-21	0.504373	[0.47 0.54]	1.48561e-75	0.691835	[0.63 0.76]	4.9332e-14
Age	0.979035	[0.98 0.98]	4.6201e-103	0.995529	[0.99 1.00]	0.00522807	0.943612	[0.94 0.95]	0	0.96796	[0.96 0.97]	8.43534e-54	0.914069	[0.91 0.92]	4.16541e-283	0.939103	[0.93 0.95]	8.25756e-60	0.94169	[0.94 0.95]	3.25783e-150	0.983552	[0.98 0.99]	8.53209e-06
Ethnicity (default: White European)
South Asian	0.710605	[0.59 0.85]	0.000223776	0.733563	[0.58 0.92]	0.00795019	0.466547	[0.36 0.61]	2.58318e-08	0.480472	[0.35 0.67]	1.38046e-05	0.664851	[0.44 1.01]	0.0531868	0.563963	[0.34 0.94]	0.027687	0.701155	[0.47 1.04]	0.0742886	0.638186	[0.39 1.04]	0.0702812
African Caribbean	0.566244	[0.46 0.69]	3.32745e-08	0.525818	[0.41 0.68]	1.25137e-06	0.528563	[0.41 0.68]	5.54457e-07	0.34679	[0.25 0.49]	1.5035e-09	0.435308	[0.27 0.71]	0.000777111	0.26746	[0.15 0.49]	1.70883e-05	1.0132	[0.73 1.40]	0.936626	0.393762	[0.25 0.63]	8.0637e-05
Chinese	0.576313	[0.41 0.81]	0.00155558	0.431311	[0.26 0.72]	0.00123266	0.342693	[0.20 0.59]	0.000102219	0.309979	[0.15 0.64]	0.00139548	0.687766	[0.34 1.40]	0.300515	0.406312	[0.14 1.14]	0.0870158	0.573834	[0.27 1.22]	0.148694	0.701513	[0.29 1.67]	0.422587
Mixed or other	0.956168	[0.84 1.09]	0.510471	0.855576	[0.72 1.02]	0.0811562	0.967116	[0.82 1.14]	0.687626	0.792308	[0.64 0.98]	0.0352554	0.971216	[0.73 1.30]	0.842662	0.624447	[0.43 0.92]	0.0163254	1.42607	[1.12 1.81]	0.00336125	0.920325	[0.67 1.27]	0.60958
Assessment centre region (default: South England/London)
Midlands/Wales				0.973146	[0.92 1.03]	0.336758				0.98496	[0.92 1.06]	0.685307				1.06706	[0.94 1.21]	0.317813				1.14672	[1.01 1.30]	0.0301465
North England				0.880128	[0.84 0.92]	1.05615e-09				0.913546	[0.87 0.96]	0.00104053				0.823691	[0.75 0.91]	0.000114758				0.832465	[0.76 0.92]	0.000215735
Scotland				0.854503	[0.79 0.92]	3.58583e-05				0.809645	[0.73 0.90]	4.19023e-05				0.806683	[0.67 0.97]	0.0189722				0.772624	[0.64 0.93]	0.00543158
Season of blood sample taken (default: Summer)
Spring				0.951654	[0.90 1.00]	0.0533612				0.904795	[0.85 0.97]	0.00301967				0.914724	[0.81 1.03]	0.141355				0.925412	[0.82 1.04]	0.199626
Autumn				1.01083	[0.96 1.06]	0.673403				0.973886	[0.91 1.04]	0.430946				0.920282	[0.82 1.04]	0.174659				1.09621	[0.98 1.23]	0.123289
Winter				0.963109	[0.91 1.02]	0.182955				0.89383	[0.83 0.96]	0.00275344				0.954764	[0.84 1.09]	0.488318				1.00337	[0.88 1.14]	0.959466
BMI				0.996873	[0.99 1.00]	0.134701				1.0067	[1.00 1.01]	0.0106169				0.988509	[0.98 1.00]	0.0149909				1.00139	[0.99 1.01]	0.752076
Physical activity (default: None)
Low				0.916153	[0.77 1.09]	0.318256				0.689146	[0.57 0.84]					0.721411	[0.50 1.04]	0.0768412				0.543355	[0.40 0.74]	8.64786e-05
Moderate				0.946433	[0.80 1.12]	0.520447				0.663213	[0.55 0.80]					0.785192	[0.55 1.11]	0.176383				0.559583	[0.42 0.75]	0.000101693
High				0.959579	[0.81 1.14]	0.631547				0.698366	[0.58 0.84]					0.785153	[0.55 1.12]	0.178928				0.610903	[0.46 0.82]	0.0010232
Townsend deprivation index (default: 1 [most deprived])
2				0.90541	[0.86 0.96]	0.00065727				0.900788	[0.84 0.97]	0.00572463				0.867129	[0.76 0.99]	0.029287				0.84912	[0.75 0.96]	0.00937248
3				0.819679	[0.77 0.87]	3.21601e-11				0.843804	[0.78 0.91]	1.2638e-05				0.806804	[0.71 0.92]	0.00167797				0.703784	[0.62 0.80]	2.06306e-07
4				0.844194	[0.80 0.90]	1.40878e-08				0.798277	[0.74 0.86]	1.18602e-08				0.770686	[0.67 0.88]	0.000190201				0.652557	[0.57 0.75]	8.64883e-10
5				0.789337	[0.74 0.84]	3.06833e-15				0.809924	[0.75 0.87]	8.6075e-08				0.679907	[0.59 0.78]	8.28606e-08				0.585315	[0.51 0.67]	1.22361e-13
Housing tenure (default: Own outright)
Rent/mortgage payment				0.988747	[0.95 1.03]	0.595781				1.05803	[1.00 1.12]	0.0456647				0.989501	[0.90 1.09]	0.836217				1.179	[1.07 1.30]	0.001318
Rent from local authority				1.04321	[0.91 1.19]	0.53952				1.26837	[1.08 1.48]	0.0030673				1.34014	[1.04 1.72]	0.0222181				2.1666	[1.77 2.66]	1.21307e-13
Live in accomodation rent-free				1.01573	[0.81 1.28]	0.893071				1.47542	[1.14 1.91]	0.00325632				1.09508	[0.66 1.82]	0.724836				1.88338	[1.24 2.86]	0.00306652
None of the options				1.20279	[0.88 1.64]	0.241417				1.33789	[0.92 1.95]	0.128043				1.38872	[0.76 2.53]	0.281897				1.99217	[1.16 3.42]	0.0124207
Population density (default:Urban)
Rural				0.946745	[0.89 1.01]	0.10678				0.982639	[0.90 1.07]	0.699232				0.893672	[0.75 1.06]	0.194835				0.967742	[0.82 1.14]
Highest level of education attained (defauult: College or University degree)
A levels/AS levels or equivalent				0.925546	[0.87 0.99]	0.0187765				0.865593	[0.80 0.94]	0.000794971				0.814217	[0.70 0.94]	0.00670928				0.92715	[0.80 1.07]	0.312046
O levels/GCSEs or equivalent				0.833914	[0.79 0.88]	1.07825e-11				0.726424	[0.68 0.78]	1.26739e-18				0.590882	[0.52 0.68]	2.02886e-14				0.824201	[0.73 0.93]	0.00206322
CSEs or equivalent				0.756108	[0.68 0.83]	3.10323e-08				0.620525	[0.54 0.71]	1.07133e-12				0.57546	[0.46 0.72]	2.14684e-06				0.802461	[0.65 0.99]	0.0360681
NVQ or HND or HNC or equivalent				0.802431	[0.73 0.88]	1.72974e-06				0.671044	[0.59 0.76]	5.9821e-10				0.594573	[0.47 0.76]	3.0002e-05				0.658137	[0.53 0.82]	0.000270217
Other professional qualifications eg: nursing, teaching				0.890932	[0.85 0.94]	1.86012e-05				0.891484	[0.83 0.96]	0.00119049				0.742954	[0.65 0.85]	1.07455e-05				0.91539	[0.81 1.04]	0.1633
Employment status (default: Employed/student)
Retired				0.950883	[0.91 0.99]	0.0294791				0.983319	[0.93 1.05]	0.588116				0.956066	[0.85 1.07]	0.438092				1.02426	[0.92 1.14]	0.671266
Unemployed for various reasons				1.07066	[0.99 1.16]	0.0805846				1.12251	[1.02 1.23]	0.0146043				1.26815	[1.10 1.47]	0.00128062				1.55904	[1.36 1.79]	5.30103e-10
Other				0.97552	[0.91 1.05]	0.494347				1.02939	[0.94 1.12]	0.515979				0.936843	[0.80 1.09]	0.41113				1.08841	[0.94 1.26]	0.260925
Sexually abused as a child (default: No)
Rarely/Sometimes				1.41325	[1.32 1.51]	4.69598e-25				1.90539	[1.77 2.06]	4.43977e-62				2.3433	[2.08 2.64]	1.47129e-43				2.34372	[2.08 2.63]	3.39508e-46
Often/Very often				1.32107	[1.13 1.55]	0.000652214				1.81918	[1.54 2.15]	3.64145e-12				2.50266	[1.98 3.17]	1.9908e-14				3.30144	[2.70 4.03]	1.70452e-31
Physically abused as a child (default: No)
Rarely/Sometimes				1.18966	[1.13 1.25]	1.2281e-11				1.36956	[1.29 1.46]	1.83501e-23				1.64743	[1.48 1.83]	6.30583e-21				1.49195	[1.34 1.66]	4.11119e-14
Often/Very often				0.993967	[0.86 1.15]	0.934603				1.21087	[1.04 1.42]	0.0161389				1.47782	[1.17 1.87]	0.00103253				1.75206	[1.44 2.14]	3.04087e-08
Emotionally abused as a child (default: No)
Rarely/Sometimes				1.80477	[1.71 1.90]	8.91754e-112				2.06205	[1.94 2.20]	1.60458e-111				2.24845	[2.02 2.50]	1.03763e-49				2.66824	[2.40 2.96]	1.52539e-75
Often/Very often				2.16824	[1.96 2.40]	1.26968e-49				2.9953	[2.68 3.35]	8.61307e-83				3.4245	[2.89 4.05]	9.92056e-47				4.52785	[3.89 5.28]	1.89469e-83
Adopted as a child (default: No)
Yes				1.07447	[0.92 1.26]	0.380753				1.23709	[1.02 1.50]	0.0312408				1.40117	[1.02 1.93]	0.038809				1.53481	[1.14 2.06]	0.00430852
Risk taking behaviour (default: No)
Yes				1.12339	[1.08 1.17]	2.56297e-08				1.21653	[1.15 1.28]	4.22134e-13				1.20943	[1.10 1.33]	8.65559e-05				1.45299	[1.33 1.59]	6.77768e-16
Neuroticism				1.18343	[1.18 1.19]	0				1.18966	[1.18 1.20]	0				1.20554	[1.19 1.22]	9.04997e-158				1.21013	[1.19 1.23]	1.25557e-169
Family/friend visits (default: Never/no friends outside household)
Few times a year				0.900452	[0.76 1.07]	0.224247				0.8208	[0.67 1.01]	0.0565142				0.989311	[0.68 1.44]	0.955306				0.664498	[0.50 0.89]	0.00604685
Few times a week				0.840426	[0.71 0.99]	0.0413537				0.717398	[0.59 0.88]	0.00115227				0.821877	[0.57 1.19]	0.30108				0.574304	[0.43 0.76]	0.000143323
Almost daily				0.784821	[0.66 0.94]	0.00718629				0.658679	[0.53 0.82]	0.000137503				0.785305	[0.53 1.17]	0.233262				0.536308	[0.39 0.73]	0.000100581
Able to confide (default: Never)
Few times a year				1.02156	[0.95 1.10]	0.567316				0.947723	[0.86 1.04]	0.265608				1.01435	[0.85 1.21]	0.872356				0.767466	[0.65 0.90]	0.00114944
Few times a week				0.993692	[0.93 1.06]	0.845253				0.879836	[0.81 0.96]	0.00229339				1.03224	[0.89 1.20]	0.679513				0.738841	[0.64 0.85]	1.40238e-05
Almost daily				0.798178	[0.75 0.85]	1.19975e-14				0.725567	[0.67 0.78]	2.66856e-17				0.786304	[0.68 0.90]	0.000778175				0.598833	[0.53 0.68]	7.13324e-16
Pain at any site longer than 3 months (default: No)
Yes				1.08092	[1.04 1.12]	0.000108592				1.12678	[1.07 1.19]	4.91331e-06				1.05777	[0.96 1.16]	0.234184				1.07314	[0.98 1.17]	0.122239
Bipolar disorder status (default: No)
Bipolar 1 or 2				3.65783	[3.06 4.37]	9.03793e-47				7.85104	[6.56 9.39]	8.22773e-113				7.87664	[6.10 10.17]	2.08191e-56				17.8556	[14.30 22.30]	1.90193e-142
Depression ever (default: No)
Yes				3.38503	[3.24 3.54]	0				5.81761	[5.52 6.13]	0				4.4246	[4.04 4.85]	1.87465e-220				9.08159	[8.28 9.96]	0
Schizophrenia diagnosis (default: No)
Yes				1.94533	[1.12 3.39]	0.0189017				4.97943	[2.89 8.59]	7.92894e-09				3.71059	[1.42 9.67]	0.0073124				30.2114	[18.14 50.30]	3.18461e-39
Intercept	1.00843	[0.88 1.16]	0.903549	0.189796	[0.13 0.27]	1.7305e-21	6.72588	[5.66 8.00]	2.19866e-103	0.606829	[0.40 0.93]	0.0205815	15.411	[11.12 21.36]	1.11247e-60	1.61389	[0.75 3.48]	0.222699	2.27087	[1.67 3.09]	1.78348e-07	0.0580327	[0.03 0.12]	1.83613e-15
Abbreviations: MHQ2: ‘Health and Wellbeing’ (Mental Health Questionnaire 2; 2022); RRR: relative risk ratio; CI: confidence interval
Note: Statistical significance at p<.0125; Nbasic = 149,892; Nexpanded = 110,450

## Sheet: metrics
Number of observations	149892		110450
AIC	265770		168166
BIC	266127		170280
** p<.0025, * p<.0125
