# Supplementary material
Source: Research Square preprint supplement (doi:10.21203/rs.3.rs-8873105/v1)
Supplement: Supplementary file 10 [file 7b436d5e61d75fa66975e96f.xlsx]

## Sheet: min
	Category	Total	No lifetime suicidal ideation or behaviour	Passive suicidal ideation	Active suicidal ideation	Self-harm behaviour	Suicide attempt	Suicide death
N		168,983 (100%)	120,797 (71.48%)	25,955 (15.36%)	14,100 (8.34%)	3,664 (2.17%)	4,104 (2.43%)	363 (0.21%)
Serum vitamin D status
	Deficiency (<25)	18,002 (11.81%)	11,921 (66.22%)	3,041 (16.89%)	1,831 (10.17%)	518 (2.88%)	629 (3.49%)	62 (0.34%)
	Insufficient (25-49)	63,840 (41.89%)	45,035 (70.54%)	10,070 (15.77%)	5,588 (8.75%)	1,430 (2.24%)	1,575 (2.47%)	142 (0.22%)
	Optimal (50-125)	70,557 (46.30%)	52,015 (73.72%)	10,287 (14.58%)	5,328 (7.55%)	1,347 (1.91%)	1,457 (2.06%)	123 (0.17%)
	Total	152,399 (100%)	108,971 (71.50%)	23,398 (15.35%)	12,747 (8.36%)	3,295 (2.16%)	3,661 (2.40%)	327 (0.21%)
Sex
	Female	94,833 (57.43%)	64,236 (67.74%)	15,974 (16.84%)	9,067 (9.56%)	2,598 (2.74%)	2,850 (3.01%)	108 (0.11%)
	Male	70,288 (42.57%)	53,822 (76.57%)	9,404 (13.38%)	4,693 (6.68%)	972 (1.38%)	1,151 (1.64%)	246 (0.35%)
	Total	165,121 (100%)	118,058 (71.50%)	25,378 (15.37%)	13,760 (8.33%)	3,570 (2.16%)	4,001 (2.42%)	354 (0.21%)
Age groups (quartiles)
	52-64	47,290 (28.05%)	29,794 (63.00%)	8,006 (16.93%)	5,903 (12.48%)	1,846 (3.90%)	1,738 (3.68%)	3 (0.01%)
	65-70	39,919 (23.68%)	27,974 (70.08%)	6,306 (15.80%)	3,610 (9.04%)	977 (2.45%)	1,048 (2.63%)	4 (0.01%)
	71-75	40,695 (24.14%)	30,751 (75.56%)	6,099 (14.99%)	2,566 (6.31%)	482 (1.18%)	795 (1.95%)	2 (0.00%)
	76-87	40,707 (24.14%)	32,261 (79.25%)	5,541 (13.61%)	2,020 (4.96%)	359 (0.88%)	523 (1.28%)	3 (0.01%)
	Total	168,611 (100%)	120,780 (71.63%)	25,952 (15.39%)	14,099 (8.36%)	3,664 (2.17%)	4,104 (2.43%)	12 (0.01%)
Ethnicity: main groups
	White European	163,461 (97.23%)	116,851 (71.49%)	25,151 (15.39%)	13,678 (8.37%)	3,530 (2.16%)	3,905 (2.39%)	346 (0.21%)
	South Asian	1,193 (0.71%)	918 (76.95%)	153 (12.82%)	65 (5.45%)	25 (2.10%)	28 (2.35%)	4 (0.34%)
	African Caribbean	1,132 (0.67%)	862 (76.15%)	123 (10.87%)	74 (6.54%)	19 (1.68%)	48 (4.24%)	6 (0.53%)
	Chinese	375 (0.22%)	293 (78.13%)	50 (13.33%)	15 (4.00%)	10 (2.67%)	7 (1.87%)
	Mixed or other	1,955 (1.16%)	1,313 (67.16%)	299 (15.29%)	193 (9.87%)	57 (2.92%)	89 (4.55%)	4 (0.20%)
	Total	168,116 (100%)	120,237 (71.52%)	25,776 (15.33%)	14,025 (8.34%)	3,641 (2.17%)	4,077 (2.43%)	360 (0.21%)

## Sheet: Row percentages
Supplemental Table 3. Description of the participants of the MHQ2 cohort. Counts expressed as N (%) and continuous variable expressed as median (IQR) or mean (SD).
	Category	Total	No lifetime suicidal ideation or behaviour	Thoughts of life not worth living	Self-harm ideation	Self-harm behaviour	Suicide attempt	Suicide death
N		168,983 (100%)	120,797 (71.48%)	25,955 (15.36%)	14,100 (8.34%)	3,664 (2.17%)	4,104 (2.43%)	363 (0.21%)
Serum 25(OH)D (nmol/L)
		47.8 (33.60-62.90)	48.80 (34.40-63.80)	46.50 (32.80-61.80)	45.30 (31.50-60.40)	44.70 (31.10-60.60)	44.30 (30.20-60.40)	43.90 (28.00-59.90)
Serum vitamin D status
	Deficiency	18,002 (11.81%)	11,921 (66.22%)	3,041 (16.89%)	1,831 (10.17%)	518 (2.88%)	629 (3.49%)	62 (0.34%)
	Insufficiency	63,840 (41.89%)	45,035 (70.54%)	10,070 (15.77%)	5,588 (8.75%)	1,430 (2.24%)	1,575 (2.47%)	142 (0.22%)
	Optimal	70,557 (46.30%)	52,015 (73.72%)	10,287 (14.58%)	5,328 (7.55%)	1,347 (1.91%)	1,457 (2.06%)	123 (0.17%)
	Total	152,399 (100%)	108,971 (71.50%)	23,398 (15.35%)	12,747 (8.36%)	3,295 (2.16%)	3,661 (2.40%)	327 (0.21%)
Sex
	Female	94,833 (57.43%)	64,236 (67.74%)	15,974 (16.84%)	9,067 (9.56%)	2,598 (2.74%)	2,850 (3.01%)	108 (0.11%)
	Male	70,288 (42.57%)	53,822 (76.57%)	9,404 (13.38%)	4,693 (6.68%)	972 (1.38%)	1,151 (1.64%)	246 (0.35%)
	Total	165,121 (100%)	118,058 (71.50%)	25,378 (15.37%)	13,760 (8.33%)	3,570 (2.16%)	4,001 (2.42%)	354 (0.21%)
Age (years)
		69.42 (7.50)	70.10 (7.39)	68.81 (7.49)	66.72 (7.37)	65.04 (7.18)	66.47 (7.30)	69.92 (8.27)
Ethnicity: main groups
	White European	163,461 (97.23%)	116,851 (71.49%)	25,151 (15.39%)	13,678 (8.37%)	3,530 (2.16%)	3,905 (2.39%)	346 (0.21%)
	South Asian	1,193 (0.71%)	918 (76.95%)	153 (12.82%)	65 (5.45%)	25 (2.10%)	28 (2.35%)	4 (0.34%)
	African Caribbean	1,132 (0.67%)	862 (76.15%)	123 (10.87%)	74 (6.54%)	19 (1.68%)	48 (4.24%)	6 (0.53%)
	Chinese	375 (0.22%)	293 (78.13%)	50 (13.33%)	15 (4.00%)	10 (2.67%)	7 (1.87%)
	Mixed or other	1,955 (1.16%)	1,313 (67.16%)	299 (15.29%)	193 (9.87%)	57 (2.92%)	89 (4.55%)	4 (0.20%)
	Total	168,116 (100%)	120,237 (71.52%)	25,776 (15.33%)	14,025 (8.34%)	3,641 (2.17%)	4,077 (2.43%)	360 (0.21%)
Assessment centre region
	South England/London	66,014 (39.07%)	46,437 (70.34%)	10,594 (16.05%)	5,627 (8.52%)	1,560 (2.36%)	1,672 (2.53%)	124 (0.19%)
	Midlands/Wales	24,582 (14.55%)	17,431 (70.91%)	3,736 (15.20%)	2,117 (8.61%)	567 (2.31%)	666 (2.71%)	65 (0.26%)
	North England	66,918 (39.60%)	48,479 (72.45%)	9,955 (14.88%)	5,485 (8.20%)	1,310 (1.96%)	1,532 (2.29%)	157 (0.23%)
	Scotland	11,469 (6.79%)	8,450 (73.68%)	1,670 (14.56%)	871 (7.59%)	227 (1.98%)	234 (2.04%)	17 (0.15%)
	Total	168,983 (100%)	120,797 (71.48%)	25,955 (15.36%)	14,100 (8.34%)	3,664 (2.17%)	4,104 (2.43%)	363 (0.21%)
Season of blood sample taken
	Spring	48,406 (28.65%)	34,651 (71.58%)	7,399 (15.29%)	4,023 (8.31%)	1,034 (2.14%)	1,193 (2.46%)	106 (0.22%)
	Summer	44,777 (26.50%)	31,866 (71.17%)	6,856 (15.31%)	3,876 (8.66%)	1,009 (2.25%)	1,073 (2.40%)	97 (0.22%)
	Autumn	40,561 (24.00%)	28,888 (71.22%)	6,361 (15.68%)	3,388 (8.35%)	852 (2.10%)	1,000 (2.47%)	72 (0.18%)
	Winter	35,239 (20.85%)	25,392 (72.06%)	5,339 (15.15%)	2,813 (7.98%)	769 (2.18%)	838 (2.38%)	88 (0.25%)
	Total	168,983 (100%)	120,797 (71.48%)	25,955 (15.36%)	14,100 (8.34%)	3,664 (2.17%)	4,104 (2.43%)	363 (0.21%)
BMI (kg/m2)
		26.73 (4.52)	26.67 (4.35)	26.71 (4.69)	27.08 (5.03)	26.52 (5.18)	27.36 (5.36)	26.65 (4.73)
Physical activity
	None	2,054 (1.22%)	1,283 (62.46%)	341 (16.60%)	256 (12.46%)	65 (3.16%)	104 (5.06%)	5 (0.24%)
	Low	22,918 (13.57%)	16,070 (70.12%)	3,626 (15.82%)	2,103 (9.18%)	495 (2.16%)	588 (2.57%)	36 (0.16%)
	Moderate	75,618 (44.76%)	54,310 (71.82%)	11,643 (15.40%)	6,154 (8.14%)	1,691 (2.24%)	1,679 (2.22%)	141 (0.19%)
	High	68,333 (40.45%)	49,097 (71.85%)	10,335 (15.12%)	5,578 (8.16%)	1,410 (2.06%)	1,733 (2.54%)	180 (0.26%)
	Total	168,923 (100%)	120,760 (71.49%)	25,945 (15.36%)	14,091 (8.34%)	3,661 (2.17%)	4,104 (2.43%)	362 (0.21%)
Townsend deprivation index (most (1) - least (5) deprived)
	1	32,880 (19.48%)	21,135 (64.28%)	5,787 (17.60%)	3,466 (10.54%)	1,012 (3.08%)	1,360 (4.14%)	120 (0.36%)
	2	33,631 (19.92%)	23,592 (70.15%)	5,350 (15.91%)	2,984 (8.87%)	768 (2.28%)	860 (2.56%)	77 (0.23%)
	3	33,792 (20.02%)	24,704 (73.11%)	4,975 (14.72%)	2,672 (7.91%)	690 (2.04%)	697 (2.06%)	54 (0.16%)
	4	34,052 (20.17%)	25,187 (73.97%)	5,020 (14.74%)	2,504 (7.35%)	653 (1.92%)	632 (1.86%)	56 (0.16%)
	5	34,443 (20.40%)	26,062 (75.67%)	4,789 (13.90%)	2,457 (7.13%)	534 (1.55%)	545 (1.58%)	56 (0.16%)
	Total	168,798 (100%)	120,680 (71.49%)	25,921 (15.36%)	14,083 (8.34%)	3,657 (2.17%)	4,094 (2.43%)	363 (0.22%)
Housing tenure
	Own outright	89,594 (53.29%)	67,660 (75.52%)	13,092 (14.61%)	5,858 (6.54%)	1,345 (1.50%)	1,470 (1.64%)	169 (0.19%)
	Rent/mortgage payment	72,715 (43.25%)	49,334 (67.85%)	11,695 (16.08%)	7,364 (10.13%)	2,057 (2.83%)	2,121 (2.92%)	144 (0.20%)
	Rent from local authority	4,120 (2.45%)	2,149 (52.16%)	735 (17.84%)	595 (14.44%)	182 (4.42%)	417 (10.12%)	42 (1.02%)
	Live in accommodation rent-free	1,073 (0.64%)	693 (64.59%)	172 (16.03%)	129 (12.02%)	32 (2.98%)	45 (4.19%)	2 (0.19%)
	None of the options	624 (0.37%)	379 (60.74%)	114 (18.27%)	76 (12.18%)	25 (4.01%)	30 (4.81%)
	Total	168,126 (100%)	120,215 (71.50%)	25,808 (15.35%)	14,022 (8.34%)	3,641 (2.17%)	4,083 (2.43%)	357 (0.21%)
Population density
	Urban	153,305 (91.67%)	109,276 (71.28%)	23,625 (15.41%)	12,914 (8.42%)	3,362 (2.19%)	3,789 (2.47%)	339 (0.22%)
	Rural	13,935 (8.33%)	10,388 (74.55%)	2,001 (14.36%)	1,019 (7.31%)	245 (1.76%)	260 (1.87%)	22 (0.16%)
	Total	167,240 (100%)	119,664 (71.55%)	25,626 (15.32%)	13,933 (8.33%)	3,607 (2.16%)	4,049 (2.42%)	361 (0.22%)
Highest level of education attained
	College or University degree	78,708 (49.90%)	54,886 (69.73%)	12,618 (16.03%)	7,151 (9.09%)	2,041 (2.59%)	1,886 (2.40%)	126 (0.16%)
	A levels/AS levels or equivalent	13,981 (8.86%)	9,655 (69.06%)	2,284 (16.34%)	1,286 (9.20%)	351 (2.51%)	376 (2.69%)	29 (0.21%)
	O levels/GCSEs or equivalent	26,153 (16.58%)	19,098 (73.02%)	3,917 (14.98%)	1,984 (7.59%)	445 (1.70%)	642 (2.45%)	67 (0.26%)
	CSEs or equivalent	6,193 (3.93%)	4,431 (71.55%)	896 (14.47%)	515 (8.32%)	129 (2.08%)	201 (3.25%)	21 (0.34%)
	NVQ or HND or HNC or equivalent	7,620 (4.83%)	5,751 (75.47%)	1,078 (14.15%)	486 (6.38%)	117 (1.54%)	171 (2.24%)	17 (0.22%)
	Other professional qualifications e.g.: nursing, teaching	25,087 (15.90%)	18,275 (72.85%)	3,693 (14.72%)	2,029 (8.09%)	450 (1.79%)	598 (2.38%)	42 (0.17%)
	Total	157,742 (100%)	112,096 (71.06%)	24,486 (15.52%)	13,451 (8.53%)	3,533 (2.24%)	3,874 (2.46%)	302 (0.19%)
Employment status
	Employed/student	68,332 (40.44%)	47,423 (69.40%)	10,860 (15.89%)	6,443 (9.43%)	1,795 (2.63%)	1,665 (2.44%)	146 (0.21%)
	Retired	77,090 (45.62%)	58,603 (76.02%)	11,043 (14.32%)	4,945 (6.41%)	1,041 (1.35%)	1,353 (1.76%)	105 (0.14%)
	Unemployed for various reasons	10,607 (6.28%)	6,176 (58.23%)	1,920 (18.10%)	1,339 (12.62%)	468 (4.41%)	644 (6.07%)	60 (0.57%)
	Other	12,954 (7.67%)	8,595 (66.35%)	2,132 (16.46%)	1,373 (10.60%)	360 (2.78%)	442 (3.41%)	52 (0.40%)
	Total	168,983 (100%)	120,797 (71.48%)	25,955 (15.36%)	14,100 (8.34%)	3,664 (2.17%)	4,104 (2.43%)	363 (0.21%)
Sexually abused as a child
	No	152,517 (91.51%)	112,521 (73.78%)	22,712 (14.89%)	11,552 (7.57%)	2,818 (1.85%)	2,906 (1.91%)	8 (0.01%)
	Rarely/Sometimes	11,897 (7.14%)	6,335 (53.25%)	2,388 (20.07%)	1,836 (15.43%)	593 (4.98%)	744 (6.25%)	1 (0.01%)
	Often/Very often	2,244 (1.35%)	861 (38.37%)	447 (19.92%)	441 (19.65%)	173 (7.71%)	322 (14.35%)
	Total	166,658 (100%)	119,717 (71.83%)	25,547 (15.33%)	13,829 (8.30%)	3,584 (2.15%)	3,972 (2.38%)	9 (0.01%)
Physically abused as a child
	No	138,752 (82.51%)	103,781 (74.80%)	20,183 (14.55%)	9,927 (7.15%)	2,412 (1.74%)	2,443 (1.76%)	6 (0.00%)
	Rarely/Sometimes	26,190 (15.57%)	15,359 (58.64%)	5,047 (19.27%)	3,519 (13.44%)	1,048 (4.00%)	1,214 (4.64%)	3 (0.01%)
	Often/Very often	3,232 (1.92%)	1,389 (42.98%)	632 (19.55%)	602 (18.63%)	192 (5.94%)	417 (12.90%)
	Total	168,174 (100%)	120,529 (71.67%)	25,862 (15.38%)	14,048 (8.35%)	3,652 (2.17%)	4,074 (2.42%)	9 (0.01%)
Emotionally abused as a child
	No	139,927 (83.27%)	107,219 (76.62%)	19,241 (13.75%)	9,190 (6.57%)	2,208 (1.58%)	2,065 (1.48%)	4 (0.00%)
	Rarely/Sometimes	21,898 (13.03%)	11,123 (50.79%)	5,117 (23.37%)	3,467 (15.83%)	1,001 (4.57%)	1,187 (5.42%)	3 (0.01%)
	Often/Very often	6,224 (3.70%)	2,119 (34.05%)	1,488 (23.91%)	1,366 (21.95%)	429 (6.89%)	820 (13.17%)	2 (0.03%)
	Total	168,049 (100%)	120,461 (71.68%)	25,846 (15.38%)	14,023 (8.34%)	3,638 (2.16%)	4,072 (2.42%)	9 (0.01%)
Adopted as a child
	No	166,597 (98.72%)	119,273 (71.59%)	25,559 (15.34%)	13,846 (8.31%)	3,588 (2.15%)	3,978 (2.39%)	353 (0.21%)
	Yes	2,153 (1.28%)	1,372 (63.73%)	350 (16.26%)	242 (11.24%)	70 (3.25%)	113 (5.25%)	6 (0.28%)
	Total	168,750 (100%)	120,645 (71.49%)	25,909 (15.35%)	14,088 (8.35%)	3,658 (2.17%)	4,091 (2.42%)	359 (0.21%)
Risk taking behaviour
	No	120,005 (73.40%)	87,219 (72.68%)	18,148 (15.12%)	9,464 (7.89%)	2,415 (2.01%)	2,529 (2.11%)	230 (0.19%)
	Yes	43,485 (26.60%)	29,909 (68.78%)	6,853 (15.76%)	4,095 (9.42%)	1,097 (2.52%)	1,411 (3.24%)	120 (0.28%)
	Total	163,490 (100%)	117,128 (71.64%)	25,001 (15.29%)	13,559 (8.29%)	3,512 (2.15%)	3,940 (2.41%)	350 (0.21%)
Neuroticism
		3.86 (3.16)	3.22 (2.86)	5.29 (3.20)	5.70 (3.35)	5.83 (3.40)	6.34 (3.52)	5.47 (3.71)
Family/friend visits
	Never/no friends outside household	1,995 (1.19%)	1,131 (56.69%)	383 (19.20%)	269 (13.48%)	63 (3.16%)	131 (6.57%)	18 (0.90%)
	Few times a year	36,916 (22.06%)	25,430 (68.89%)	6,076 (16.46%)	3,431 (9.29%)	940 (2.55%)	969 (2.62%)	70 (0.19%)
	Few times a week	112,417 (67.18%)	81,283 (72.30%)	16,979 (15.10%)	9,054 (8.05%)	2,302 (2.05%)	2,565 (2.28%)	234 (0.21%)
	Almost daily	16,011 (9.57%)	11,785 (73.61%)	2,271 (14.18%)	1,210 (7.56%)	309 (1.93%)	401 (2.50%)	35 (0.22%)
	Total	167,339 (100%)	119,629 (71.49%)	25,709 (15.36%)	13,964 (8.34%)	3,614 (2.16%)	4,066 (2.43%)	357 (0.21%)
Able to confide
	Never	20,348 (12.33%)	13,328 (65.50%)	3,616 (17.77%)	2,089 (10.27%)	477 (2.34%)	774 (3.80%)	64 (0.31%)
	Few times a year	17,364 (10.52%)	11,361 (65.43%)	3,211 (18.49%)	1,771 (10.20%)	460 (2.65%)	525 (3.02%)	36 (0.21%)
	Few times a week	34,899 (21.15%)	23,146 (66.32%)	6,288 (18.02%)	3,387 (9.71%)	967 (2.77%)	1,023 (2.93%)	88 (0.25%)
	Almost daily	92,418 (56.00%)	69,838 (75.57%)	12,367 (13.38%)	6,630 (7.17%)	1,696 (1.84%)	1,723 (1.86%)	164 (0.18%)
	Total	165,029 (100%)	117,673 (71.30%)	25,482 (15.44%)	13,877 (8.41%)	3,600 (2.18%)	4,045 (2.45%)	352 (0.21%)
Pain at any site longer than 3 months
	No	121,156 (71.93%)	88,508 (73.05%)	17,840 (14.72%)	9,371 (7.73%)	2,475 (2.04%)	2,709 (2.24%)	253 (0.21%)
	Yes	47,288 (28.07%)	31,936 (67.54%)	8,026 (16.97%)	4,664 (9.86%)	1,172 (2.48%)	1,381 (2.92%)	109 (0.23%)
	Total	168,444 (100%)	120,444 (71.50%)	25,866 (15.36%)	14,035 (8.33%)	3,647 (2.17%)	4,090 (2.43%)	362 (0.21%)
Bipolar disorder status
	No disorder	166,810 (99.01%)	120,350 (72.15%)	25,496 (15.28%)	13,625 (8.17%)	3,503 (2.10%)	3,816 (2.29%)	20 (0.01%)
	Bipolar 1 or 2	1,660 (0.99%)	404 (24.34%)	404 (24.34%)	437 (26.33%)	145 (8.73%)	267 (16.08%)	3 (0.18%)
	Total	168,470 (100%)	120,754 (71.68%)	25,900 (15.37%)	14,062 (8.35%)	3,648 (2.17%)	4,083 (2.42%)	23 (0.01%)
Depression ever
	No depression	138,787 (82.30%)	109,829 (79.13%)	17,594 (12.68%)	7,518 (5.42%)	2,046 (1.47%)	1,782 (1.28%)	18 (0.01%)
	Yes	29,843 (17.70%)	10,957 (36.72%)	8,358 (28.01%)	6,582 (22.06%)	1,617 (5.42%)	2,322 (7.78%)	7 (0.02%)
	Total	168,630 (100%)	120,786 (71.63%)	25,952 (15.39%)	14,100 (8.36%)	3,663 (2.17%)	4,104 (2.43%)	25 (0.01%)
Schizophrenia diagnosis
	No	168,758 (99.87%)	120,728 (71.54%)	25,920 (15.36%)	14,062 (8.33%)	3,651 (2.16%)	4,044 (2.40%)	353 (0.21%)
	Yes	225 (0.13%)	69 (30.67%)	35 (15.56%)	38 (16.89%)	13 (5.78%)	60 (26.67%)	10 (4.44%)
	Total	168,983 (100%)	120,797 (71.48%)	25,955 (15.36%)	14,100 (8.34%)	3,664 (2.17%)	4,104 (2.43%)	363 (0.21%)

## Sheet: Column percentages
Supplemental Table 3. Description of the participants of the MHQ2 cohort. Counts expressed as N (%) and continuous variable expressed as median (interquartile range) or mean (standard deviation).
	Category	Total	No lifetime suicidal ideation or behaviour	Passive suicidal ideation	Self-harm ideation	Self-harm behaviour	Suicide attempt	Suicide death
N		168,983 (100%)	120,797 (100.00%)	25,955 (100.00%)	14,100 (100.00%)	3,664 (100.00%)	4,104 (100.00%)	363 (100.00%)
Serum 25(OH)D (nmol/L)
		47.8 (33.60-62.90)	48.80 (34.40-63.80)	46.50 (32.80-61.80)	45.30 (31.50-60.40)	44.70 (31.10-60.60)	44.30 (30.20-60.40)	43.90 (28.00-59.90)
Serum vitamin D status
	Deficiency	18,002 (11.81%)	11,921 (10.94%)	3,041 (13.00%)	1,831 (14.36%)	518 (15.72%)	629 (17.18%)	62 (18.96%)
	Insufficiency	63,840 (41.89%)	45,035 (41.33%)	10,070 (43.04%)	5,588 (43.84%)	1,430 (43.40%)	1,575 (43.02%)	142 (43.43%)
	Optimal	70,557 (46.30%)	52,015 (47.73%)	10,287 (43.97%)	5,328 (41.80%)	1,347 (40.88%)	1,457 (39.80%)	123 (37.61%)
Sex
	Female	94,833 (57.43%)	64,236 (54.41%)	15,974 (62.94%)	9,067 (65.89%)	2,598 (72.77%)	2,850 (71.23%)	108 (30.51%)
Age (years)
		69.42 (7.50)	70.10 (7.39)	68.81 (7.49)	66.72 (7.37)	65.04 (7.18)	66.47 (7.30)	69.92 (8.27)
Ethnicity: main groups
	White European	163,461 (97.23%)	116,851 (97.18%)	25,151 (97.58%)	13,678 (97.53%)	3,530 (96.95%)	3,905 (95.78%)	346 (96.11%)
	South Asian	1,193 (0.71%)	918 (0.76%)	153 (0.59%)	65 (0.46%)	25 (0.69%)	28 (0.69%)	4 (1.11%)
	African Caribbean	1,132 (0.67%)	862 (0.72%)	123 (0.48%)	74 (0.53%)	19 (0.52%)	48 (1.18%)	6 (1.67%)
	Chinese	375 (0.22%)	293 (0.24%)	50 (0.19%)	15 (0.11%)	10 (0.27%)	7 (0.17%)
	Mixed or other	1,955 (1.16%)	1,313 (1.09%)	299 (1.16%)	193 (1.38%)	57 (1.57%)	89 (2.18%)	4 (1.11%)
Assessment centre region
	South England/London	66,014 (39.07%)	46,437 (38.44%)	10,594 (40.82%)	5,627 (39.91%)	1,560 (42.58%)	1,672 (40.74%)	124 (34.16%)
	Midlands/Wales	24,582 (14.55%)	17,431 (14.43%)	3,736 (14.39%)	2,117 (15.01%)	567 (15.47%)	666 (16.23%)	65 (17.91%)
	North England	66,918 (39.60%)	48,479 (40.13%)	9,955 (38.35%)	5,485 (38.90%)	1,310 (35.75%)	1,532 (37.33%)	157 (43.25%)
	Scotland	11,469 (6.79%)	8,450 (7.00%)	1,670 (6.43%)	871 (6.18%)	227 (6.20%)	234 (5.70%)	17 (4.68%)
Season of blood sample taken
	Spring	48,406 (28.65%)	34,651 (28.69%)	7,399 (28.51%)	4,023 (28.53%)	1,034 (28.22%)	1,193 (29.07%)	106 (29.20%)
	Summer	44,777 (26.50%)	31,866 (26.38%)	6,856 (26.41%)	3,876 (27.49%)	1,009 (27.54%)	1,073 (26.15%)	97 (26.72%)
	Autumn	40,561 (24.00%)	28,888 (23.91%)	6,361 (24.51%)	3,388 (24.03%)	852 (23.25%)	1,000 (24.37%)	72 (19.83%)
	Winter	35,239 (20.85%)	25,392 (21.02%)	5,339 (20.57%)	2,813 (19.95%)	769 (20.99%)	838 (20.42%)	88 (24.24%)
BMI (kg/m2)
		26.73 (4.52)	26.67 (4.35)	26.71 (4.69)	27.08 (5.03)	26.52 (5.18)	27.36 (5.36)	26.65 (4.73)
Physical activity
	None	2,054 (1.22%)	1,283 (1.06%)	341 (1.31%)	256 (1.82%)	65 (1.78%)	104 (2.53%)	5 (1.38%)
	Low	22,918 (13.57%)	16,070 (13.31%)	3,626 (13.98%)	2,103 (14.92%)	495 (13.52%)	588 (14.33%)	36 (9.94%)
	Moderate	75,618 (44.76%)	54,310 (44.97%)	11,643 (44.88%)	6,154 (43.67%)	1,691 (46.19%)	1,679 (40.91%)	141 (38.95%)
	High	68,333 (40.45%)	49,097 (40.66%)	10,335 (39.83%)	5,578 (39.59%)	1,410 (38.51%)	1,733 (42.23%)	180 (49.72%)
Townsend deprivation index (most (1) - least (5) deprived)
	1	32,880 (19.48%)	21,135 (17.51%)	5,787 (22.33%)	3,466 (24.61%)	1,012 (27.67%)	1,360 (33.22%)	120 (33.06%)
	2	33,631 (19.92%)	23,592 (19.55%)	5,350 (20.64%)	2,984 (21.19%)	768 (21.00%)	860 (21.01%)	77 (21.21%)
	3	33,792 (20.02%)	24,704 (20.47%)	4,975 (19.19%)	2,672 (18.97%)	690 (18.87%)	697 (17.02%)	54 (14.88%)
	4	34,052 (20.17%)	25,187 (20.87%)	5,020 (19.37%)	2,504 (17.78%)	653 (17.86%)	632 (15.44%)	56 (15.43%)
	5	34,443 (20.40%)	26,062 (21.60%)	4,789 (18.48%)	2,457 (17.45%)	534 (14.60%)	545 (13.31%)	56 (15.43%)
Housing tenure
	Own outright	89,594 (53.29%)	67,660 (56.28%)	13,092 (50.73%)	5,858 (41.78%)	1,345 (36.94%)	1,470 (36.00%)	169 (47.34%)
	Rent/mortgage payment	72,715 (43.25%)	49,334 (41.04%)	11,695 (45.32%)	7,364 (52.52%)	2,057 (56.50%)	2,121 (51.95%)	144 (40.34%)
	Rent from local authority	4,120 (2.45%)	2,149 (1.79%)	735 (2.85%)	595 (4.24%)	182 (5.00%)	417 (10.21%)	42 (11.76%)
	Live in accommodation rent-free	1,073 (0.64%)	693 (0.58%)	172 (0.67%)	129 (0.92%)	32 (0.88%)	45 (1.10%)	2 (0.56%)
	None of the options	624 (0.37%)	379 (0.32%)	114 (0.44%)	76 (0.54%)	25 (0.69%)	30 (0.73%)
Population density
	Urban	153,305 (91.67%)	109,276 (91.32%)	23,625 (92.19%)	12,914 (92.69%)	3,362 (93.21%)	3,789 (93.58%)	339 (93.91%)
Highest level of education attained
	College or University degree	78,708 (49.90%)	54,886 (48.96%)	12,618 (51.53%)	7,151 (53.16%)	2,041 (57.77%)	1,886 (48.68%)	126 (41.72%)
	A levels/AS levels or equivalent	13,981 (8.86%)	9,655 (8.61%)	2,284 (9.33%)	1,286 (9.56%)	351 (9.93%)	376 (9.71%)	29 (9.60%)
	O levels/GCSEs or equivalent	26,153 (16.58%)	19,098 (17.04%)	3,917 (16.00%)	1,984 (14.75%)	445 (12.60%)	642 (16.57%)	67 (22.19%)
	CSEs or equivalent	6,193 (3.93%)	4,431 (3.95%)	896 (3.66%)	515 (3.83%)	129 (3.65%)	201 (5.19%)	21 (6.95%)
	NVQ or HND or HNC or equivalent	7,620 (4.83%)	5,751 (5.13%)	1,078 (4.40%)	486 (3.61%)	117 (3.31%)	171 (4.41%)	17 (5.63%)
	Other professional qualifications e.g.: nursing, teaching	25,087 (15.90%)	18,275 (16.30%)	3,693 (15.08%)	2,029 (15.08%)	450 (12.74%)	598 (15.44%)	42 (13.91%)
Employment status
	Employed/student	68,332 (40.44%)	47,423 (39.26%)	10,860 (41.84%)	6,443 (45.70%)	1,795 (48.99%)	1,665 (40.57%)	146 (40.22%)
	Retired	77,090 (45.62%)	58,603 (48.51%)	11,043 (42.55%)	4,945 (35.07%)	1,041 (28.41%)	1,353 (32.97%)	105 (28.93%)
	Unemployed for various reasons	10,607 (6.28%)	6,176 (5.11%)	1,920 (7.40%)	1,339 (9.50%)	468 (12.77%)	644 (15.69%)	60 (16.53%)
	Other	12,954 (7.67%)	8,595 (7.12%)	2,132 (8.21%)	1,373 (9.74%)	360 (9.83%)	442 (10.77%)	52 (14.33%)
Sexually abused as a child
	No	152,517 (91.51%)	112,521 (93.99%)	22,712 (88.90%)	11,552 (83.53%)	2,818 (78.63%)	2,906 (73.16%)	8 (88.89%)
	Rarely/Sometimes	11,897 (7.14%)	6,335 (5.29%)	2,388 (9.35%)	1,836 (13.28%)	593 (16.55%)	744 (18.73%)	1 (11.11%)
	Often/Very often	2,244 (1.35%)	861 (0.72%)	447 (1.75%)	441 (3.19%)	173 (4.83%)	322 (8.11%)
Physically abused as a child
	No	138,752 (82.51%)	103,781 (86.10%)	20,183 (78.04%)	9,927 (70.66%)	2,412 (66.05%)	2,443 (59.97%)	6 (66.67%)
	Rarely/Sometimes	26,190 (15.57%)	15,359 (12.74%)	5,047 (19.52%)	3,519 (25.05%)	1,048 (28.70%)	1,214 (29.80%)	3 (33.33%)
	Often/Very often	3,232 (1.92%)	1,389 (1.15%)	632 (2.44%)	602 (4.29%)	192 (5.26%)	417 (10.24%)
Emotionally abused as a child
	No	139,927 (83.27%)	107,219 (89.01%)	19,241 (74.44%)	9,190 (65.54%)	2,208 (60.69%)	2,065 (50.71%)	4 (44.44%)
	Rarely/Sometimes	21,898 (13.03%)	11,123 (9.23%)	5,117 (19.80%)	3,467 (24.72%)	1,001 (27.52%)	1,187 (29.15%)	3 (33.33%)
	Often/Very often	6,224 (3.70%)	2,119 (1.76%)	1,488 (5.76%)	1,366 (9.74%)	429 (11.79%)	820 (20.14%)	2 (22.22%)
Adopted as a child
	Yes	2,153 (1.28%)	1,372 (1.14%)	350 (1.35%)	242 (1.72%)	70 (1.91%)	113 (2.76%)	6 (1.67%)
Risk taking behaviour
	Yes	43,485 (26.60%)	29,909 (25.54%)	6,853 (27.41%)	4,095 (30.20%)	1,097 (31.24%)	1,411 (35.81%)	120 (34.29%)
Neuroticism
		3.86 (3.16)	3.22 (2.86)	5.29 (3.20)	5.70 (3.35)	5.83 (3.40)	6.34 (3.52)	5.47 (3.71)
Family/friend visits
	Never/no friends outside household	1,995 (1.19%)	1,131 (0.95%)	383 (1.49%)	269 (1.93%)	63 (1.74%)	131 (3.22%)	18 (5.04%)
	Few times a year	36,916 (22.06%)	25,430 (21.26%)	6,076 (23.63%)	3,431 (24.57%)	940 (26.01%)	969 (23.83%)	70 (19.61%)
	Few times a week	112,417 (67.18%)	81,283 (67.95%)	16,979 (66.04%)	9,054 (64.84%)	2,302 (63.70%)	2,565 (63.08%)	234 (65.55%)
	Almost daily	16,011 (9.57%)	11,785 (9.85%)	2,271 (8.83%)	1,210 (8.67%)	309 (8.55%)	401 (9.86%)	35 (9.80%)
Able to confide
	Never	20,348 (12.33%)	13,328 (11.33%)	3,616 (14.19%)	2,089 (15.05%)	477 (13.25%)	774 (19.13%)	64 (18.18%)
	Few times a year	17,364 (10.52%)	11,361 (9.65%)	3,211 (12.60%)	1,771 (12.76%)	460 (12.78%)	525 (12.98%)	36 (10.23%)
	Few times a week	34,899 (21.15%)	23,146 (19.67%)	6,288 (24.68%)	3,387 (24.41%)	967 (26.86%)	1,023 (25.29%)	88 (25.00%)
	Almost daily	92,418 (56.00%)	69,838 (59.35%)	12,367 (48.53%)	6,630 (47.78%)	1,696 (47.11%)	1,723 (42.60%)	164 (46.59%)
Pain at any site longer than 3 months
	Yes	47,288 (28.07%)	31,936 (26.52%)	8,026 (31.03%)	4,664 (33.23%)	1,172 (32.14%)	1,381 (33.77%)	109 (30.11%)
Bipolar disorder status
	Bipolar 1 or 2	1,660 (0.99%)	404 (0.33%)	404 (1.56%)	437 (3.11%)	145 (3.97%)	267 (6.54%)	3 (13.04%)
Depression ever
	Yes	29,843 (17.70%)	10,957 (9.07%)	8,358 (32.21%)	6,582 (46.68%)	1,617 (44.14%)	2,322 (56.58%)	7 (28.00%)
Schizophrenia diagnosis
	Yes	225 (0.13%)	69 (0.06%)	35 (0.13%)	38 (0.27%)	13 (0.35%)	60 (1.46%)	10 (2.75%)
Abbreviations: MHQ2: ‘Health and Wellbeing’ (Mental Health Questionnaire 2; 2022)
