# Supplementary material
Source: Research Square preprint supplement (doi:10.21203/rs.3.rs-8873105/v1)
Supplement: Supplementary file 11 [file 8fa67c126ada17b94d5e18b0.xlsx]

## Sheet: ST12
Supplemental Table 12. Associations of vitamin D levels with suicide outcomes for MHQ2 participants without symptoms of major mental illnesses.
	Passive suicidal ideation						Self-harm ideation						Self-harm behaviour						Suicide attempt
	Basic			Expanded			Basic			Expanded			Basic			Expanded			Basic			Expanded
	RRR	95% CI	P	RRR	95% CI	P	RRR	95% CI	P	RRR	95% CI	P	RRR	95% CI	P	RRR	95% CI	P	RRR	95% CI	P	RRR	95% CI	P
Serum vitamin D status (default: Optimal)
Deficiency	1.25346	[1.19 1.33]	2.06209e-15	1.21537	[1.13 1.31]	2.10404e-07	1.28371	[1.18 1.39]	2.33482e-09	1.20291	[1.08 1.34]	0.000861722	1.259	[1.08 1.46]	0.00279756	1.15322	[0.95 1.40]	0.156208	1.41818	[1.20 1.68]	5.95923e-05	1.17005	[0.93 1.47]	0.176084
Insufficiency	1.12255	[1.08 1.16]	6.74747e-10	1.0973	[1.05 1.15]	0.000110093	1.17257	[1.11 1.24]	1.47266e-08	1.13486	[1.06 1.22]	0.0003933	1.09648	[0.99 1.22]	0.0845298	1.07161	[0.94 1.22]	0.293506	1.16258	[1.03 1.31]	0.0142005	1.07208	[0.92 1.25]	0.369698
Sex (default: Female)
Male	0.757898	[0.73 0.78]	5.90693e-55	0.842491	[0.81 0.88]	8.66907e-14	0.699693	[0.66 0.74]	2.28417e-40	0.755794	[0.71 0.81]	4.34698e-16	0.531079	[0.48 0.59]	9.38649e-33	0.598374	[0.53 0.68]	7.2874e-15	0.509239	[0.45 0.57]	1.71161e-28	0.555614	[0.48 0.65]	3.92722e-14
Age	0.985885	[0.98 0.99]	2.2478e-33	0.996079	[0.99 1.00]	0.0371534	0.953032	[0.95 0.96]	7.84523e-167	0.966335	[0.96 0.97]	3.52464e-35	0.923445	[0.92 0.93]	8.95953e-124	0.937275	[0.93 0.95]	1.39303e-36	0.962036	[0.95 0.97]	1.57118e-24	0.985905	[0.97 1.00]	0.0178996
Ethnicity (default: White European)
South Asian	0.759602	[0.61 0.94]	0.0107755	0.699148	[0.54 0.91]	0.00741395	0.555385	[0.39 0.79]	0.000925002	0.486029	[0.32 0.74]	0.000742795	0.744062	[0.43 1.30]	0.298553	0.686335	[0.37 1.28]	0.234328	0.849613	[0.45 1.60]	0.613612	0.469765	[0.19 1.16]	0.100638
African Caribbean	0.557453	[0.44 0.71]	3.68971e-06	0.450789	[0.33 0.62]	8.79961e-07	0.624779	[0.45 0.87]	0.00464217	0.318559	[0.20 0.51]	1.53213e-06	0.475816	[0.25 0.92]	0.0279506	0.299361	[0.14 0.65]	0.00219997	1.65461	[1.05 2.60]	0.0292253	0.511179	[0.26 1.00]	0.0490362
Chinese	0.571338	[0.38 0.86]	0.0078167	0.360426	[0.19 0.68]	0.00143559	0.443998	[0.23 0.87]	0.0170994	0.261741	[0.10 0.72]	0.00921809	0.678598	[0.25 1.83]	0.443751	0.185119	[0.03 1.35]	0.0957059	0.733626	[0.23 2.30]	0.59481	0.946349	[0.29 3.09]	0.927195
Mixed or other	1.02662	[0.88 1.20]	0.741834	0.883638	[0.72 1.08]	0.228305	0.887385	[0.70 1.12]	0.318208	0.667272	[0.49 0.90]	0.00858324	0.976925	[0.65 1.46]	0.909536	0.55548	[0.32 0.96]	0.0351781	1.69104	[1.16 2.46]	0.00621678	1.05011	[0.65 1.69]	0.840651
Assessment centre region (default: South England/London)
Midlands/Wales				0.961891	[0.90 1.03]	0.244565				0.946095	[0.86 1.04]	0.271153				1.11729	[0.94 1.32]	0.201078				1.15576	[0.94 1.42]	0.161032
North England				0.867833	[0.83 0.91]	8.40498e-09				0.949226	[0.88 1.02]	0.149821				0.831229	[0.73 0.95]	0.00666031				0.911941	[0.78 1.07]	0.247036
Scotland				0.87117	[0.80 0.95]	0.00172111				0.802949	[0.70 0.92]	0.00130287				0.764936	[0.60 0.98]	0.033383				0.777186	[0.58 1.04]	0.0945907
Season of blood sample taken (default: Summer)
Spring				0.95823	[0.90 1.02]	0.15907				0.888168	[0.81 0.97]	0.00777406				0.938187	[0.80 1.10]	0.428879				0.978882	[0.81 1.19]	0.828859
Autumn				1.02749	[0.97 1.09]	0.366692				0.952268	[0.87 1.04]	0.267574				0.883064	[0.75 1.04]	0.130211				1.13902	[0.94 1.38]	0.179433
Winter				0.967943	[0.91 1.03]	0.325048				0.85925	[0.78 0.95]	0.0021204				0.847066	[0.71 1.01]	0.069325				1.08526	[0.88 1.34]	0.439631
BMI				0.998432	[0.99 1.00]	0.533136				1.00491	[1.00 1.01]	0.172745				0.986915	[0.97 1.00]	0.0532436				1.00775	[0.99 1.02]	0.294294
Physical activity (default: None)
Low				0.835815	[0.68 1.02]	0.0800598				0.600433	[0.47 0.77]	5.81923e-05				0.742495	[0.43 1.28]	0.283497				0.49285	[0.30 0.80]	0.00392063
Moderate				0.84494	[0.69 1.03]	0.0918861				0.575761	[0.45 0.73]	6.95353e-06				0.905497	[0.53 1.53]	0.711984				0.460275	[0.29 0.73]	0.000965055
High				0.867376	[0.71 1.06]	0.156456				0.581988	[0.46 0.74]	1.20161e-05				0.855456	[0.50 1.45]	0.563741				0.534964	[0.34 0.85]	0.00795212
Townsend deprivation index (default: 1 [most deprived])
2				0.889597	[0.83 0.95]	0.00063401				0.833038	[0.76 0.92]	0.000244578				0.888167	[0.75 1.06]	0.181437				0.88166	[0.73 1.07]	0.205533
3				0.804084	[0.75 0.86]	6.35435e-10				0.794114	[0.72 0.88]	6.69642e-06				0.848792	[0.71 1.02]	0.0756574				0.62207	[0.50 0.77]	1.91761e-05
4				0.821419	[0.77 0.88]	2.07548e-08				0.758669	[0.69 0.84]	9.64485e-08				0.725392	[0.60 0.88]	0.000883927				0.606828	[0.49 0.76]	9.34271e-06
5				0.76287	[0.71 0.82]	1.31508e-14				0.741814	[0.67 0.82]	6.91406e-09				0.69515	[0.58 0.84]	0.000164516				0.520693	[0.41 0.65]	2.44427e-08
Housing tenure (default: Own outright)
Rent/mortgage payment				0.990456	[0.94 1.04]	0.701575				1.07813	[1.00 1.16]	0.0420342				1.00395	[0.88 1.15]	0.953892				1.17143	[1.00 1.37]	0.0523267
Rent from local authority				1.02348	[0.87 1.21]	0.786597				1.26003	[1.01 1.57]	0.0412534				1.80056	[1.28 2.54]	0.000826455				2.07591	[1.47 2.93]	3.14395e-05
Live in accomodation rent-free				0.9939	[0.76 1.31]	0.964983				1.54663	[1.11 2.16]	0.0109359				1.20221	[0.61 2.37]	0.59395				1.80333	[0.91 3.57]	0.0904425
None of the options				1.19492	[0.83 1.73]	0.343186				1.66264	[1.04 2.65]	0.0319287				1.45854	[0.63 3.38]	0.379058				2.29711	[0.99 5.33]	0.0526378
Population density (default:Urban)
Rural				0.98839	[0.92 1.07]	0.764969				0.979976	[0.87 1.10]	0.733025				0.903089	[0.72 1.13]	0.374148				1.0073	[0.77 1.31]	0.956883
Highest level of education attained (defauult: College or University degree)
A levels/AS levels or equivalent				0.922939	[0.86 1.00]	0.0386035				0.809753	[0.72 0.91]	0.000318747				0.855664	[0.70 1.04]	0.125513				1.00938	[0.79 1.28]	0.939009
O levels/GCSEs or equivalent				0.816945	[0.77 0.87]	1.16287e-10				0.702337	[0.64 0.77]	2.27706e-13				0.604208	[0.50 0.72]	4.96248e-08				0.870862	[0.72 1.06]	0.166893
CSEs or equivalent				0.726103	[0.65 0.82]	1.02399e-07				0.596362	[0.50 0.71]	8.9643e-09				0.600098	[0.44 0.81]	0.00106992				0.84516	[0.61 1.17]	0.314967
NVQ or HND or HNC or equivalent				0.787945	[0.71 0.88]	9.97924e-06				0.695885	[0.59 0.82]	1.57472e-05				0.521712	[0.37 0.74]	0.00030451				0.731318	[0.51 1.04]	0.0824964
Other professional qualifications eg: nursing, teaching				0.875334	[0.82 0.93]	2.98745e-05				0.906657	[0.83 0.99]	0.0357671				0.753622	[0.63 0.90]	0.00205832				0.997444	[0.82 1.21]	0.979649
Employment status (default: Employed/student)
Retired				0.94599	[0.90 1.00]	0.0402191				0.98488	[0.91 1.07]	0.707979				0.921658	[0.79 1.07]	0.292558				0.995017	[0.83 1.19]	0.955718
Unemployed for various reasons				1.10871	[1.01 1.21]	0.0268255				1.09147	[0.96 1.24]	0.176121				1.16306	[0.95 1.43]	0.149448				1.26357	[0.98 1.63]	0.072425
Other				0.974612	[0.89 1.06]	0.554877				0.985094	[0.87 1.11]	0.805115				0.893335	[0.72 1.11]	0.307722				1.31318	[1.04 1.65]	0.0194927
Sexually abused as a child (default: No)
Rarely/Sometimes				1.48532	[1.37 1.61]	2.89281e-23				2.03044	[1.84 2.24]	1.29583e-43				2.38584	[2.02 2.82]	1.89922e-24				2.71202	[2.26 3.26]	2.76455e-26
Often/Very often				1.48283	[1.21 1.82]	0.000153622				2.20489	[1.74 2.79]	5.13806e-11				2.35883	[1.62 3.44]	8.31157e-06				3.11817	[2.18 4.45]	3.75285e-10
Physically abused as a child (default: No)
Rarely/Sometimes				1.2709	[1.20 1.35]	2.47895e-15				1.4603	[1.35 1.58]	1.22718e-19				1.69074	[1.47 1.95]	5.59272e-13				1.50698	[1.27 1.79]	3.32168e-06
Often/Very often				0.986266	[0.82 1.18]	0.880544				0.993238	[0.79 1.25]	0.953802				1.29958	[0.90 1.87]	0.160375				2.01916	[1.46 2.80]	2.45061e-05
Emotionally abused as a child (default: No)
Rarely/Sometimes				1.86789	[1.76 1.99]	1.463e-89				2.11731	[1.95 2.30]	1.18731e-68				2.34193	[2.02 2.71]	1.88152e-30				2.60535	[2.20 3.09]	4.96942e-28
Often/Very often				2.49502	[2.20 2.84]	1.4629e-44				3.4332	[2.94 4.01]	2.43974e-54				3.46628	[2.68 4.49]	3.31725e-21				4.56602	[3.49 5.97]	8.9047e-29
Adopted as a child (default: No)
Yes				1.09817	[0.91 1.33]	0.334132				1.42155	[1.11 1.82]	0.00479482				1.15953	[0.72 1.87]	0.545285				1.59552	[1.00 2.54]	0.0486996
Risk taking behaviour (default: No)
Yes				1.13545	[1.08 1.19]	2.30227e-07				1.20331	[1.12 1.29]	2.34221e-07				1.22044	[1.07 1.39]	0.00240274				1.35587	[1.17 1.57]	5.82687e-05
Neuroticism				1.20988	[1.20 1.22]	0				1.21055	[1.20 1.22]	6.39612e-300				1.2114	[1.19 1.23]	4.55294e-92				1.21092	[1.18 1.24]	3.43649e-67
Family/friend visits (default: Never/no friends outside household)
Few times a year				0.888588	[0.73 1.08]	0.225003				0.933745	[0.72 1.22]	0.614656				1.21342	[0.70 2.11]	0.493212				0.742928	[0.46 1.19]	0.219839
Few times a week				0.821552	[0.68 0.99]	0.0409944				0.800637	[0.61 1.04]	0.0987471				1.02644	[0.59 1.78]	0.925777				0.661169	[0.41 1.05]	0.0821642
Almost daily				0.759204	[0.62 0.93]	0.00727134				0.763511	[0.57 1.01]	0.0631223				0.998125	[0.56 1.79]	0.994979				0.631906	[0.38 1.06]	0.0805537
Able to confide (default: Never)
Few times a year				1.0477	[0.96 1.14]	0.280311				0.948693	[0.84 1.07]	0.399391				1.0579	[0.84 1.34]	0.637309				0.708559	[0.55 0.92]	0.00942772
Few times a week				1.02948	[0.96 1.11]	0.438994				0.902216	[0.81 1.00]	0.0577921				1.01654	[0.83 1.25]	0.874964				0.698316	[0.56 0.87]	0.00126719
Almost daily				0.80315	[0.75 0.86]	7.95517e-11				0.708969	[0.64 0.78]	1.68707e-12				0.806642	[0.67 0.97]	0.0248209				0.589045	[0.49 0.71]	8.3439e-08
Pain at any site longer than 3 months (default: No)
Yes				1.09636	[1.05 1.15]	0.000110938				1.1617	[1.09 1.24]	1.65441e-05				1.04002	[0.92 1.18]	0.548163				1.04809	[0.90 1.22]	0.534807
Intercept	0.444968	[0.38 0.52]	4.50525e-22	0.17683	[0.12 0.26]	1.19927e-17	1.89445	[1.49 2.40]	1.28684e-07	0.737548	[0.43 1.28]	0.279062	4.67163	[3.00 7.28]	1.00153e-11	1.4091	[0.48 4.15]	0.534146	0.218885	[0.13 0.37]	7.94174e-09	0.0465701	[0.02 0.14]	8.33249e-08
Abbreviations: MHQ2: ‘Health and Wellbeing’ (Mental Health Questionnaire 2; 2022); RRR: relative risk ratio; CI: confidence interval
Note: Statistical significance at p<.0125; Nbasic = 121,809; Nexpanded = 89,746

## Sheet: metrics
Number of observations	121809		89746
AIC	167966		112318
BIC	168315		114274
** p<.0025, * p<.0125
