# Supplementary material
Source: Research Square preprint supplement (doi:10.21203/rs.3.rs-8873105/v1)
Supplement: Supplementary file 12 [file b385763daffbacb0d7190081.xlsx]

## Sheet: ST10
Supplemental Table 10. Associations of vitamin D levels with suicide outcomes for male MHQ2 participants.
	Passive suicidal ideation						Self-harm ideation						Self-harm behaviour						Suicide attempt
	Basic			Expanded			Basic			Expanded			Basic			Expanded			Basic			Expanded
	RRR	95% CI	P	RRR	95% CI	P	RRR	95% CI	P	RRR	95% CI	P	RRR	95% CI	P	RRR	95% CI	P	RRR	95% CI	P	RRR	95% CI	P
Serum vitamin D status (default: Optimal)
Deficiency	1.21046	[1.12 1.31]	6.98887e-07	1.13705	[1.03 1.26]	0.0134046	1.3767	[1.25 1.52]	2.51683e-10	1.22741	[1.07 1.41]	0.00373624	1.64085	[1.35 1.99]	4.08028e-07	1.44128	[1.11 1.87]	0.00620876	1.74533	[1.46 2.09]	8.99788e-10	1.25355	[0.97 1.62]	0.082005
Insufficiency	1.10683	[1.05 1.16]	5.34682e-05	1.09388	[1.03 1.17]	0.00652128	1.17782	[1.10 1.26]	2.30741e-06	1.16731	[1.07 1.28]	0.000703986	1.04902	[0.91 1.22]	0.523749	1.0248	[0.85 1.23]	0.795309	1.15333	[1.01 1.32]	0.0387559	1.04106	[0.87 1.24]	0.653697
Age	0.972086	[0.97 0.98]	1.55834e-73	0.99156	[0.99 1.00]	0.0006977	0.939238	[0.94 0.94]	8.98488e-192	0.966617	[0.96 0.97]	2.88177e-23	0.901727	[0.89 0.91]	5.89871e-109	0.92423	[0.91 0.94]	7.08006e-29	0.930009	[0.92 0.94]	2.97379e-68	0.970047	[0.96 0.98]	4.13745e-06
Ethnicity (default: White European)
South Asian	0.622333	[0.48 0.81]	0.000410793	0.661083	[0.47 0.92]	0.0154189	0.300427	[0.19 0.48]	3.78581e-07	0.336748	[0.19 0.59]	0.00013032	0.176133	[0.06 0.55]	0.00292828	0.135211	[0.03 0.56]	0.00575322	0.274635	[0.11 0.67]	0.00441627	0.214051	[0.06 0.73]	0.0138862
African Caribbean	0.501683	[0.36 0.71]	7.72586e-05	0.631832	[0.42 0.95]	0.028171	0.34341	[0.21 0.57]	3.40664e-05	0.29689	[0.15 0.58]	0.000432827	0.242788	[0.08 0.76]	0.0151875	0.188125	[0.05 0.79]	0.0219648	0.623279	[0.31 1.27]	0.191233	0.519604	[0.21 1.28]	0.155292
Chinese	0.612323	[0.33 1.15]	0.126701	0.303251	[0.10 0.90]	0.0317524	0.0933552	[0.01 0.67]	0.0185207	2.45427e-07	[0.00 .]	0.980781	8.72981e-07	[0.00 .]	0.983164	9.90096e-08	[0.00 .]	0.992563	1.41392	[0.51 3.89]	0.50193	1.07793	[0.23 5.15]	0.925094
Mixed or other	0.920701	[0.73 1.16]	0.476214	0.783025	[0.58 1.05]	0.106701	0.957926	[0.72 1.28]	0.768435	0.7353	[0.50 1.08]	0.112783	1.2573	[0.77 2.06]	0.363809	0.720733	[0.37 1.41]	0.340213	1.15338	[0.71 1.89]	0.56936	0.71185	[0.37 1.36]	0.301762
Assessment centre region (default: South England/London)
Midlands/Wales				0.941178	[0.86 1.03]	0.173987				0.90712	[0.80 1.02]	0.116449				0.954676	[0.75 1.22]	0.707733				0.994836	[0.79 1.25]	0.965119
North England				0.851028	[0.80 0.91]	1.35102e-06				0.86685	[0.79 0.95]	0.00182397				0.82669	[0.69 0.99]	0.0424373				0.876163	[0.73 1.05]	0.141809
Scotland				0.84524	[0.75 0.95]	0.00614063				0.774093	[0.65 0.92]	0.00357967				0.760884	[0.53 1.08]	0.128426				0.943192	[0.68 1.30]	0.721489
Season of blood sample taken (default: Summer)
Spring				0.95305	[0.88 1.03]	0.248124				0.835712	[0.75 0.93]	0.00170202				0.749382	[0.60 0.94]	0.0115776				0.819528	[0.66 1.02]	0.0722187
Autumn				1.04101	[0.96 1.13]	0.324976				0.977239	[0.88 1.09]	0.678318				0.766892	[0.61 0.96]	0.0200085				0.940406	[0.76 1.16]	0.570034
Winter				0.981213	[0.90 1.07]	0.672472				0.844543	[0.75 0.95]	0.00650095				0.745869	[0.58 0.95]	0.0194045				0.867827	[0.69 1.10]	0.234761
BMI				0.994961	[0.99 1.00]	0.178197				0.996843	[0.99 1.01]	0.527748				0.976514	[0.96 1.00]	0.0207181				0.998732	[0.98 1.02]	0.890453
Physical activity (default: None)
Low				0.880084	[0.69 1.12]	0.30777				0.699546	[0.52 0.94]	0.0186538				0.465315	[0.27 0.81]	0.00658374				0.73968	[0.42 1.29]	0.28899
Moderate				0.866984	[0.68 1.10]	0.242105				0.667227	[0.50 0.89]	0.0060134				0.560326	[0.33 0.95]	0.0305383				0.772572	[0.45 1.32]	0.347471
High				0.928761	[0.73 1.18]	0.547559				0.696462	[0.52 0.93]	0.0149874				0.557267	[0.33 0.95]	0.0311524				0.856484	[0.50 1.47]	0.575
Townsend deprivation index (default: 1 [most deprived])
2				0.938274	[0.86 1.03]	0.172682				0.8928	[0.79 1.01]	0.0740623				0.99775	[0.79 1.26]	0.985027				0.841473	[0.67 1.05]	0.131588
3				0.825624	[0.75 0.91]	6.77741e-05				0.834017	[0.73 0.95]	0.00523448				0.772575	[0.60 1.00]	0.0492096				0.702129	[0.55 0.89]	0.00367882
4				0.875812	[0.80 0.96]	0.00533164				0.841816	[0.74 0.96]	0.00833923				0.812999	[0.63 1.05]	0.115108				0.525431	[0.40 0.68]	1.44352e-06
5				0.799053	[0.73 0.88]	2.48383e-06				0.799274	[0.70 0.91]	0.0005833				0.692682	[0.53 0.90]	0.00671656				0.575043	[0.45 0.74]	1.82587e-05
Housing tenure (default: Own outright)
Rent/mortgage payment				1.02601	[0.96 1.10]	0.449127				1.12156	[1.02 1.23]	0.0148684				0.959116	[0.79 1.16]	0.666997				1.37814	[1.14 1.66]	0.000742048
Rent from local authority				1.02138	[0.82 1.27]	0.850574				1.19905	[0.92 1.57]	0.184428				1.42026	[0.91 2.22]	0.124213				2.39004	[1.67 3.43]	2.23344e-06
Live in accomodation rent-free				1.16275	[0.84 1.61]	0.366832				1.67284	[1.13 2.47]	0.00956767				1.40894	[0.64 3.12]	0.39794				1.82682	[0.86 3.89]	0.118252
None of the options				1.08772	[0.65 1.82]	0.748553				1.2177	[0.63 2.35]	0.557056				3.12128	[1.40 6.96]	0.00537999				4.54579	[2.08 9.92]	0.000141689
Population density (default:Urban)
Rural				0.972167	[0.87 1.08]	0.603205				0.954326	[0.82 1.11]	0.543726				0.827648	[0.59 1.16]	0.277991				1.15022	[0.85 1.55]	0.35593
Highest level of education attained (defauult: College or University degree)
A levels/AS levels or equivalent				0.982654	[0.88 1.09]	0.745108				0.889567	[0.77 1.03]	0.116795				1.01525	[0.77 1.33]	0.913479				1.07066	[0.82 1.40]	0.613994
O levels/GCSEs or equivalent				0.901841	[0.83 0.99]	0.0219605				0.788558	[0.70 0.89]	0.00020774				0.827654	[0.65 1.06]	0.129982				1.02933	[0.82 1.29]	0.802272
CSEs or equivalent				0.840097	[0.72 0.99]	0.0320224				0.755165	[0.61 0.94]	0.0102965				0.559305	[0.36 0.87]	0.0108018				0.877146	[0.60 1.28]	0.4962
NVQ or HND or HNC or equivalent				0.787322	[0.70 0.89]	0.000112501				0.644299	[0.54 0.77]	2.13057e-06				0.639464	[0.44 0.93]	0.0199181				0.88649	[0.64 1.22]	0.464884
Other professional qualifications eg: nursing, teaching				0.916303	[0.84 1.00]	0.0456523				0.983503	[0.88 1.10]	0.778219				0.665241	[0.51 0.88]	0.00357365				0.917554	[0.72 1.16]	0.476439
Employment status (default: Employed/student)
Retired				0.892267	[0.83 0.96]	0.00169541				0.990698	[0.90 1.10]	0.854981				0.903431	[0.73 1.12]	0.358508				1.19352	[0.98 1.46]	0.0833244
Unemployed for various reasons				1.1313	[0.96 1.33]	0.135054				1.43798	[1.19 1.74]	0.000223133				1.62619	[1.18 2.25]	0.00317492				2.06263	[1.54 2.77]	1.30665e-06
Other				0.872084	[0.78 0.97]	0.0154116				1.00202	[0.87 1.15]	0.977589				0.983452	[0.75 1.28]	0.901709				1.11569	[0.87 1.44]	0.39806
Sexually abused as a child (default: No)
Rarely/Sometimes				1.39246	[1.24 1.57]	6.15537e-08				2.07494	[1.80 2.39]	2.1211e-24				3.28565	[2.60 4.15]	1.09637e-23				2.17533	[1.70 2.78]	4.40061e-10
Often/Very often				1.34989	[0.93 1.95]	0.112337				1.73012	[1.14 2.62]	0.00984134				2.76422	[1.47 5.20]	0.00162207				4.19613	[2.61 6.74]	2.99838e-09
Physically abused as a child (default: No)
Rarely/Sometimes				1.2299	[1.14 1.33]	7.59037e-08				1.33815	[1.21 1.48]	6.8286e-09				1.55597	[1.29 1.88]	5.69008e-06				1.35623	[1.12 1.64]	0.00140108
Often/Very often				1.12481	[0.89 1.41]	0.313321				1.22779	[0.94 1.60]	0.126269				1.67904	[1.09 2.58]	0.0178493				2.25132	[1.58 3.22]	8.31269e-06
Emotionally abused as a child (default: No)
Rarely/Sometimes				1.67162	[1.53 1.82]	4.66907e-32				2.11204	[1.90 2.35]	8.81007e-43				2.0774	[1.69 2.55]	3.19257e-12				2.37342	[1.95 2.88]	3.63703e-18
Often/Very often				2.18312	[1.81 2.63]	1.2478e-16				3.09039	[2.51 3.80]	1.77108e-26				3.25444	[2.30 4.60]	2.43532e-11				3.85666	[2.84 5.24]	6.31205e-18
Adopted as a child (default: No)
Yes				1.09698	[0.85 1.41]	0.469882				1.33188	[0.98 1.81]	0.0687526				0.939849	[0.47 1.86]	0.858969				1.75786	[1.06 2.92]	0.0288182
Risk taking behaviour (default: No)
Yes				1.01939	[0.96 1.08]	0.53264				1.12743	[1.04 1.22]	0.00413881				1.2192	[1.03 1.44]	0.0186665				1.12435	[0.96 1.32]	0.14615
Neuroticism				1.20047	[1.19 1.21]	0				1.19812	[1.18 1.21]	1.2871e-179				1.24099	[1.21 1.27]	2.61984e-66				1.21312	[1.18 1.24]	4.07825e-58
Family/friend visits (default: Never/no friends outside household)
Few times a year				0.897556	[0.73 1.11]	0.316864				0.950291	[0.72 1.25]	0.719115				1.09207	[0.63 1.91]	0.756895				0.692043	[0.45 1.06]	0.0888025
Few times a week				0.81025	[0.66 1.00]	0.0481536				0.800863	[0.61 1.05]	0.11238				0.884506	[0.51 1.54]	0.662707				0.591296	[0.39 0.89]	0.0127588
Almost daily				0.75352	[0.59 0.96]	0.0192676				0.744975	[0.54 1.02]	0.0674242				0.916849	[0.49 1.72]	0.787294				0.704942	[0.43 1.14]	0.156615
Able to confide (default: Never)
Few times a year				1.08842	[0.98 1.21]	0.118172				0.975664	[0.84 1.13]	0.741241				1.1761	[0.88 1.57]	0.275965				0.850678	[0.65 1.11]	0.241311
Few times a week				1.02098	[0.93 1.12]	0.66715				0.957777	[0.84 1.09]	0.510873				1.16948	[0.90 1.52]	0.239463				0.808004	[0.64 1.03]	0.0797046
Almost daily				0.805522	[0.74 0.87]	9.11947e-08				0.777163	[0.70 0.87]	5.14184e-06				0.917322	[0.73 1.15]	0.459962				0.660228	[0.54 0.81]	5.31399e-05
Pain at any site longer than 3 months (default: No)
Yes				1.08801	[1.02 1.16]	0.0102008				1.08089	[0.99 1.18]	0.0838539				1.01626	[0.85 1.22]	0.861598				1.18833	[1.01 1.40]	0.0403212
Bipolar disorder status (default: No)
Bipolar 1 or 2				3.54571	[2.69 4.67]	2.80411e-19				9.3886	[7.16 12.32]	8.26402e-59				9.69526	[6.44 14.60]	1.38575e-27				21.8416	[15.22 31.35]	7.75624e-63
Depression ever (default: No)
Yes				4.04751	[3.75 4.36]	2.56414e-288				7.41138	[6.77 8.11]	0				4.85562	[4.05 5.82]	5.65192e-66				12.6261	[10.67 14.94]	2.71868e-192
Schizophrenia diagnosis (default: No)
Yes				2.98114	[1.45 6.11]	0.00285541				7.44771	[3.62 15.34]	5.18523e-08				6.58078	[2.11 20.55]	0.00118121				52.5792	[26.52 104.25]	7.76252e-30
Intercept	1.18236	[0.95 1.47]	0.130499	0.230374	[0.14 0.38]	1.79418e-08	5.8922	[4.42 7.85]	1.11575e-33	0.559443	[0.29 1.10]	0.09098	18.2354	[9.93 33.48]	7.68363e-21	4.33716	[1.15 16.41]	0.0306787	2.69078	[1.54 4.69]	0.000491907	0.0643559	[0.02 0.23]	1.80938e-05
Abbreviations: MHQ2: ‘Health and Wellbeing’ (Mental Health Questionnaire 2; 2022); RRR: relative risk ratio; CI: confidence interval
Note: Statistical significance at p<.0125; Nbasic = 64,453; Nexpanded = 48,699

## Sheet: metrics
Number of observations	64453		48699
AIC	98241.1		63079.1
BIC	98531.4		64978.5
** p<.00125, * p<.00625
