# Supplementary material
Source: Research Square preprint supplement (doi:10.21203/rs.3.rs-8873105/v1)
Supplement: Supplementary file 13 [file dc26aa8b5c3086ec7998b68b.xlsx]

## Sheet: ST6
Supplemental Table 6. Model metrics for MHQ1 and MHQ2 basic and expanded models.
	MHQ1 basic	MHQ1 expanded	MHQ2 basic	MHQ2 expanded
Number of observations	138778	101984	149892	110450
McFadden’s pseudo R²	0.02	0.14	0.02	0.15
AIC	265002	170022	265770	168166
BIC	265356	172119	266127	170280
Likelihood-based chi²	5469	27143	6229	29275
Abbreviations: MHQ1: ‘Thoughts and Feelings’ (Mental Health Questionnaire 1; 2016); MHQ2: ‘Health and Wellbeing’ (Mental Health Questionnaire 2; 2022); AIC: Akaike information criterion; BIC: Bayesian information criterion
