# Supplementary material
Source: Research Square preprint supplement (doi:10.21203/rs.3.rs-8873105/v1)
Supplement: Supplementary file 14 [file ff95f3896801a989f4110403.xlsx]

## Sheet: min 
	Category	Total	No lifetime suicidal ideation or behaviour	Passive suicidal ideation	Active suicidal ideation	Self-harm behaviour	Suicide attempt	Suicide death
N		156,384 (100%)	105,331 (67.35%)	27,151 (17.36%)	16,699 (10.68%)	3,296 (2.11%)	3,544 (2.27%)	363 (0.23%)
Serum vitamin D status
	Deficiency (<25)	17,003 (12.04%)	10,411 (61.23%)	3,303 (19.43%)	2,189 (12.87%)	496 (2.92%)	542 (3.19%)	62 (0.36%)
	Insufficient (25-49)	59,259 (41.98%)	39,344 (66.39%)	10,568 (17.83%)	6,535 (11.03%)	1,311 (2.21%)	1,359 (2.29%)	142 (0.24%)
	Optimal (50-125)	64,913 (45.98%)	45,453 (70.02%)	10,612 (16.35%)	6,295 (9.70%)	1,170 (1.80%)	1,260 (1.94%)	123 (0.19%)
	Total	141,175 (100%)	95,208 (67.44%)	24,483 (17.34%)	15,019 (10.64%)	2,977 (2.11%)	3,161 (2.24%)	327 (0.23%)
Sex
	Female	86,168 (56.33%)	54,734 (63.52%)	16,269 (18.88%)	10,427 (12.10%)	2,271 (2.64%)	2,359 (2.74%)	108 (0.13%)
	Male	66,806 (43.67%)	48,370 (72.40%)	10,293 (15.41%)	5,857 (8.77%)	947 (1.42%)	1,093 (1.64%)	246 (0.37%)
	Total	152,974 (100%)	103,104 (67.40%)	26,562 (17.36%)	16,284 (10.64%)	3,218 (2.10%)	3,452 (2.26%)	354 (0.23%)
Age groups (quartiles)
	46-58	41,923 (26.86%)	24,651 (58.80%)	8,015 (19.12%)	6,242 (14.89%)	1,591 (3.80%)	1,405 (3.35%)	19 (0.05%)
	59-65	40,352 (25.86%)	26,114 (64.72%)	7,500 (18.59%)	4,785 (11.86%)	919 (2.28%)	1,022 (2.53%)	12 (0.03%)
	66-70	39,024 (25.00%)	27,985 (71.71%)	6,380 (16.35%)	3,441 (8.82%)	494 (1.27%)	714 (1.83%)	10 (0.03%)
	71-81	34,771 (22.28%)	26,581 (76.45%)	5,256 (15.12%)	2,231 (6.42%)	292 (0.84%)	403 (1.16%)	8 (0.02%)
	Total	156,070 (100%)	105,331 (67.49%)	27,151 (17.40%)	16,699 (10.70%)	3,296 (2.11%)	3,544 (2.27%)	49 (0.03%)
Ethnicity: main groups
	White European	151,055 (97.14%)	101,799 (67.39%)	26,213 (17.35%)	16,156 (10.70%)	3,177 (2.10%)	3,364 (2.23%)	346 (0.23%)
	South Asian	1,073 (0.69%)	759 (70.74%)	178 (16.59%)	82 (7.64%)	21 (1.96%)	29 (2.70%)	4 (0.37%)
	African Caribbean	1,144 (0.74%)	809 (70.72%)	173 (15.12%)	101 (8.83%)	13 (1.14%)	42 (3.67%)	6 (0.52%)
	Chinese	360 (0.23%)	268 (74.44%)	56 (15.56%)	26 (7.22%)	5 (1.39%)	5 (1.39%)
	Mixed or other	1,876 (1.21%)	1,155 (61.57%)	350 (18.66%)	228 (12.15%)	62 (3.30%)	77 (4.10%)	4 (0.21%)
	Total	155,508 (100%)	104,790 (67.39%)	26,970 (17.34%)	16,593 (10.67%)	3,278 (2.11%)	3,517 (2.26%)	360 (0.23%)

## Sheet: Row percentages
Supplemental Table 2. Description of the participants of the MHQ1 cohort. Counts expressed as N (%) and continuous variable expressed as median (IQR) or mean (SD).
	Category	Total	No lifetime suicidal ideation or behaviour	Thoughts of life not worth living	Self-harm ideation	Self-harm behaviour	Suicide attempt	Suicide death
N		156,384 (100%)	105,331 (67.35%)	27,151 (17.36%)	16,699 (10.68%)	3,296 (2.11%)	3,544 (2.27%)	363 (0.23%)
Serum 25(OH)D (nmol/L)
		47.80 (33.60-62.90)	48.80 (34.50-63.80)	46.20 (32.20-61.40)	45.50 (31.60-60.70)	43.90 (30.10-59.50)	44.00 (30.40-60.60)	43.90 (28.00-59.90)
Serum vitamin D status
	Deficiency	17,003 (12.04%)	10,411 (61.23%)	3,303 (19.43%)	2,189 (12.87%)	496 (2.92%)	542 (3.19%)	62 (0.36%)
	Insufficiency	59,259 (41.98%)	39,344 (66.39%)	10,568 (17.83%)	6,535 (11.03%)	1,311 (2.21%)	1,359 (2.29%)	142 (0.24%)
	Optimal	64,913 (45.98%)	45,453 (70.02%)	10,612 (16.35%)	6,295 (9.70%)	1,170 (1.80%)	1,260 (1.94%)	123 (0.19%)
	Total	141,175 (100%)	95,208 (67.44%)	24,483 (17.34%)	15,019 (10.64%)	2,977 (2.11%)	3,161 (2.24%)	327 (0.23%)
Sex
	Female	86,168 (56.33%)	54,734 (63.52%)	16,269 (18.88%)	10,427 (12.10%)	2,271 (2.64%)	2,359 (2.74%)	108 (0.13%)
	Male	66,806 (43.67%)	48,370 (72.40%)	10,293 (15.41%)	5,857 (8.77%)	947 (1.42%)	1,093 (1.64%)	246 (0.37%)
	Total	152,974 (100%)	103,104 (67.40%)	26,562 (17.36%)	16,284 (10.64%)	3,218 (2.10%)	3,452 (2.26%)	354 (0.23%)
Age (years)
		63.89 (7.73)	64.66 (7.64)	63.21 (7.66)	61.59 (7.54)	59.50 (7.48)	61.03 (7.47)	62.12 (8.40)
Ethnicity: main groups
	White European	151,055 (97.14%)	101,799 (67.39%)	26,213 (17.35%)	16,156 (10.70%)	3,177 (2.10%)	3,364 (2.23%)	346 (0.23%)
	South Asian	1,073 (0.69%)	759 (70.74%)	178 (16.59%)	82 (7.64%)	21 (1.96%)	29 (2.70%)	4 (0.37%)
	African Caribbean	1,144 (0.74%)	809 (70.72%)	173 (15.12%)	101 (8.83%)	13 (1.14%)	42 (3.67%)	6 (0.52%)
	Chinese	360 (0.23%)	268 (74.44%)	56 (15.56%)	26 (7.22%)	5 (1.39%)	5 (1.39%)
	Mixed or other	1,876 (1.21%)	1,155 (61.57%)	350 (18.66%)	228 (12.15%)	62 (3.30%)	77 (4.10%)	4 (0.21%)
	Total	155,508 (100%)	104,790 (67.39%)	26,970 (17.34%)	16,593 (10.67%)	3,278 (2.11%)	3,517 (2.26%)	360 (0.23%)
Assessment centre region
	South England/London	62,643 (40.06%)	41,348 (66.01%)	11,377 (18.16%)	6,872 (10.97%)	1,467 (2.34%)	1,455 (2.32%)	124 (0.20%)
	Midlands/Wales	22,788 (14.57%)	15,227 (66.82%)	3,935 (17.27%)	2,507 (11.00%)	479 (2.10%)	575 (2.52%)	65 (0.29%)
	North England	60,480 (38.67%)	41,514 (68.64%)	10,065 (16.64%)	6,289 (10.40%)	1,144 (1.89%)	1,311 (2.17%)	157 (0.26%)
	Scotland	10,473 (6.70%)	7,242 (69.15%)	1,774 (16.94%)	1,031 (9.84%)	206 (1.97%)	203 (1.94%)	17 (0.16%)
	Total	156,384 (100%)	105,331 (67.35%)	27,151 (17.36%)	16,699 (10.68%)	3,296 (2.11%)	3,544 (2.27%)	363 (0.23%)
Season of blood sample taken
	Spring	44,529 (28.47%)	29,970 (67.30%)	7,746 (17.40%)	4,711 (10.58%)	956 (2.15%)	1,040 (2.34%)	106 (0.24%)
	Summer	41,533 (26.56%)	27,769 (66.86%)	7,285 (17.54%)	4,503 (10.84%)	905 (2.18%)	974 (2.35%)	97 (0.23%)
	Autumn	37,746 (24.14%)	25,445 (67.41%)	6,570 (17.41%)	4,097 (10.85%)	755 (2.00%)	807 (2.14%)	72 (0.19%)
	Winter	32,576 (20.83%)	22,147 (67.99%)	5,550 (17.04%)	3,388 (10.40%)	680 (2.09%)	723 (2.22%)	88 (0.27%)
	Total	156,384 (100%)	105,331 (67.35%)	27,151 (17.36%)	16,699 (10.68%)	3,296 (2.11%)	3,544 (2.27%)	363 (0.23%)
BMI (kg/m2)
		26.78 (4.56)	26.71 (4.36)	26.79 (4.76)	27.08 (5.07)	26.79 (5.32)	27.54 (5.48)	26.65 (4.73)
Physical activity
	None	2,011 (1.29%)	1,125 (55.94%)	375 (18.65%)	346 (17.21%)	63 (3.13%)	97 (4.82%)	5 (0.25%)
	Low	21,361 (13.66%)	13,957 (65.34%)	3,908 (18.30%)	2,538 (11.88%)	417 (1.95%)	505 (2.36%)	36 (0.17%)
	Moderate	70,381 (45.02%)	47,690 (67.76%)	12,236 (17.39%)	7,359 (10.46%)	1,481 (2.10%)	1,474 (2.09%)	141 (0.20%)
	High	62,578 (40.03%)	42,524 (67.95%)	10,625 (16.98%)	6,451 (10.31%)	1,330 (2.13%)	1,468 (2.35%)	180 (0.29%)
	Total	156,331 (100%)	105,296 (67.35%)	27,144 (17.36%)	16,694 (10.68%)	3,291 (2.11%)	3,544 (2.27%)	362 (0.23%)
Townsend deprivation index (most (1) - least (5) deprived)
	1	31,399 (20.10%)	18,794 (59.86%)	6,077 (19.35%)	4,198 (13.37%)	960 (3.06%)	1,250 (3.98%)	120 (0.38%)
	2	31,204 (19.98%)	20,377 (65.30%)	5,661 (18.14%)	3,580 (11.47%)	739 (2.37%)	770 (2.47%)	77 (0.25%)
	3	31,184 (19.97%)	21,567 (69.16%)	5,301 (17.00%)	3,081 (9.88%)	600 (1.92%)	581 (1.86%)	54 (0.17%)
	4	30,954 (19.82%)	21,921 (70.82%)	5,056 (16.33%)	2,907 (9.39%)	518 (1.67%)	496 (1.60%)	56 (0.18%)
	5	31,446 (20.13%)	22,554 (71.72%)	5,018 (15.96%)	2,908 (9.25%)	474 (1.51%)	436 (1.39%)	56 (0.18%)
	Total	156,187 (100%)	105,213 (67.36%)	27,113 (17.36%)	16,674 (10.68%)	3,291 (2.11%)	3,533 (2.26%)	363 (0.23%)
Housing tenure
	Own outright	85,741 (55.11%)	61,513 (71.74%)	14,019 (16.35%)	7,498 (8.74%)	1,211 (1.41%)	1,331 (1.55%)	169 (0.20%)
	Rent/mortgage payment	64,063 (41.18%)	40,405 (63.07%)	11,785 (18.40%)	8,173 (12.76%)	1,803 (2.81%)	1,753 (2.74%)	144 (0.22%)
	Rent from local authority	4,157 (2.67%)	1,980 (47.63%)	834 (20.06%)	705 (16.96%)	209 (5.03%)	387 (9.31%)	42 (1.01%)
	Live in accommodation rent-free	1,023 (0.66%)	608 (59.43%)	211 (20.63%)	138 (13.49%)	30 (2.93%)	34 (3.32%)	2 (0.20%)
	None of the options	598 (0.38%)	325 (54.35%)	126 (21.07%)	95 (15.89%)	30 (5.02%)	22 (3.68%)
	Total	155,582 (100%)	104,831 (67.38%)	26,975 (17.34%)	16,609 (10.68%)	3,283 (2.11%)	3,527 (2.27%)	357 (0.23%)
Population density
	Urban	142,117 (91.81%)	95,466 (67.17%)	24,749 (17.41%)	15,233 (10.72%)	3,043 (2.14%)	3,287 (2.31%)	339 (0.24%)
	Rural	12,670 (8.19%)	8,910 (70.32%)	2,073 (16.36%)	1,239 (9.78%)	209 (1.65%)	217 (1.71%)	22 (0.17%)
	Total	154,787 (100%)	104,376 (67.43%)	26,822 (17.33%)	16,472 (10.64%)	3,252 (2.10%)	3,504 (2.26%)	361 (0.23%)
Highest level of education attained
	College or University degree	73,389 (50.47%)	48,080 (65.51%)	13,180 (17.96%)	8,568 (11.67%)	1,815 (2.47%)	1,620 (2.21%)	126 (0.17%)
	A levels/AS levels or equivalent	12,907 (8.88%)	8,334 (64.57%)	2,400 (18.59%)	1,486 (11.51%)	313 (2.43%)	345 (2.67%)	29 (0.22%)
	O levels/GCSEs or equivalent	23,711 (16.31%)	16,280 (68.66%)	4,068 (17.16%)	2,285 (9.64%)	437 (1.84%)	574 (2.42%)	67 (0.28%)
	CSEs or equivalent	5,170 (3.56%)	3,436 (66.46%)	904 (17.49%)	540 (10.44%)	120 (2.32%)	149 (2.88%)	21 (0.41%)
	NVQ or HND or HNC or equivalent	6,957 (4.78%)	4,986 (71.67%)	1,104 (15.87%)	610 (8.77%)	85 (1.22%)	155 (2.23%)	17 (0.24%)
	Other professional qualifications e.g.: nursing, teaching	23,271 (16.00%)	16,202 (69.62%)	3,810 (16.37%)	2,323 (9.98%)	405 (1.74%)	489 (2.10%)	42 (0.18%)
	Total	145,405 (100%)	97,318 (66.93%)	25,466 (17.51%)	15,812 (10.87%)	3,175 (2.18%)	3,332 (2.29%)	302 (0.21%)
Employment status
	Employed/student	75,519 (48.29%)	49,453 (65.48%)	13,599 (18.01%)	8,832 (11.70%)	1,854 (2.46%)	1,635 (2.17%)	146 (0.19%)
	Retired	56,068 (35.85%)	41,205 (73.49%)	8,844 (15.77%)	4,405 (7.86%)	648 (1.16%)	862 (1.54%)	104 (0.19%)
	Unemployed for various reasons	10,860 (6.94%)	6,012 (55.36%)	2,145 (19.75%)	1,606 (14.79%)	425 (3.91%)	612 (5.64%)	60 (0.55%)
	Other	13,937 (8.91%)	8,661 (62.14%)	2,563 (18.39%)	1,856 (13.32%)	369 (2.65%)	435 (3.12%)	53 (0.38%)
	Total	156,384 (100%)	105,331 (67.35%)	27,151 (17.36%)	16,699 (10.68%)	3,296 (2.11%)	3,544 (2.27%)	363 (0.23%)
Sexually abused as a child
	No	140,774 (91.22%)	97,885 (69.53%)	23,917 (16.99%)	13,808 (9.81%)	2,544 (1.81%)	2,582 (1.83%)	38 (0.03%)
	Rarely/Sometimes	12,096 (7.84%)	6,002 (49.62%)	2,578 (21.31%)	2,281 (18.86%)	567 (4.69%)	660 (5.46%)	8 (0.07%)
	Often/Very often	1,446 (0.94%)	505 (34.92%)	278 (19.23%)	333 (23.03%)	116 (8.02%)	211 (14.59%)	3 (0.21%)
	Total	154,316 (100%)	104,392 (67.65%)	26,773 (17.35%)	16,422 (10.64%)	3,227 (2.09%)	3,453 (2.24%)	49 (0.03%)
Physically abused as a child
	No	126,216 (81.03%)	89,165 (70.64%)	21,008 (16.64%)	11,767 (9.32%)	2,146 (1.70%)	2,096 (1.66%)	34 (0.03%)
	Rarely/Sometimes	27,231 (17.48%)	15,176 (55.73%)	5,557 (20.41%)	4,356 (16.00%)	988 (3.63%)	1,141 (4.19%)	13 (0.05%)
	Often/Very often	2,308 (1.48%)	799 (34.62%)	544 (23.57%)	521 (22.57%)	146 (6.33%)	296 (12.82%)	2 (0.09%)
	Total	155,755 (100%)	105,140 (67.50%)	27,109 (17.40%)	16,644 (10.69%)	3,280 (2.11%)	3,533 (2.27%)	49 (0.03%)
Emotionally abused as a child
	No	131,392 (84.40%)	94,672 (72.05%)	21,083 (16.05%)	11,625 (8.85%)	2,027 (1.54%)	1,952 (1.49%)	33 (0.03%)
	Rarely/Sometimes	19,757 (12.69%)	9,158 (46.35%)	4,872 (24.66%)	3,827 (19.37%)	905 (4.58%)	986 (4.99%)	9 (0.05%)
	Often/Very often	4,520 (2.90%)	1,297 (28.69%)	1,095 (24.23%)	1,183 (26.17%)	349 (7.72%)	590 (13.05%)	6 (0.13%)
	Total	155,669 (100%)	105,127 (67.53%)	27,050 (17.38%)	16,635 (10.69%)	3,281 (2.11%)	3,528 (2.27%)	48 (0.03%)
Adopted as a child
	No	154,131 (98.70%)	103,975 (67.46%)	26,738 (17.35%)	16,423 (10.66%)	3,224 (2.09%)	3,418 (2.22%)	353 (0.23%)
	Yes	2,038 (1.30%)	1,230 (60.35%)	369 (18.11%)	252 (12.37%)	66 (3.24%)	115 (5.64%)	6 (0.29%)
	Total	156,169 (100%)	105,205 (67.37%)	27,107 (17.36%)	16,675 (10.68%)	3,290 (2.11%)	3,533 (2.26%)	359 (0.23%)
Risk taking behaviour
	No	110,636 (73.12%)	76,065 (68.75%)	18,939 (17.12%)	11,143 (10.07%)	2,120 (1.92%)	2,139 (1.93%)	230 (0.21%)
	Yes	40,671 (26.88%)	26,110 (64.20%)	7,216 (17.74%)	4,931 (12.12%)	1,032 (2.54%)	1,262 (3.10%)	120 (0.30%)
	Total	151,307 (100%)	102,175 (67.53%)	26,155 (17.29%)	16,074 (10.62%)	3,152 (2.08%)	3,401 (2.25%)	350 (0.23%)
	No	111,694 (71.64%)	77,144 (69.07%)	18,657 (16.70%)	11,149 (9.98%)	2,204 (1.97%)	2,287 (2.05%)	253 (0.23%)
	Yes	44,207 (28.36%)	27,893 (63.10%)	8,390 (18.98%)	5,490 (12.42%)	1,081 (2.45%)	1,244 (2.81%)	109 (0.25%)
	Total	155,901 (100%)	105,037 (67.37%)	27,047 (17.35%)	16,639 (10.67%)	3,285 (2.11%)	3,531 (2.26%)	362 (0.23%)
Neuroticism
		3.86 (3.16)	3.14 (2.82)	5.14 (3.20)	5.58 (3.34)	5.86 (3.44)	6.29 (3.45)	5.47 (3.71)
Family/friend visits
	Never/no friends outside household	1,957 (1.26%)	1,000 (51.10%)	400 (20.44%)	346 (17.68%)	84 (4.29%)	109 (5.57%)	18 (0.92%)
	Few times a year	34,804 (22.46%)	22,420 (64.42%)	6,356 (18.26%)	4,233 (12.16%)	875 (2.51%)	850 (2.44%)	70 (0.20%)
	Few times a week	103,443 (66.75%)	70,775 (68.42%)	17,641 (17.05%)	10,547 (10.20%)	2,014 (1.95%)	2,232 (2.16%)	234 (0.23%)
	Almost daily	14,757 (9.52%)	10,204 (69.15%)	2,488 (16.86%)	1,428 (9.68%)	280 (1.90%)	322 (2.18%)	35 (0.24%)
	Total	154,961 (100%)	104,399 (67.37%)	26,885 (17.35%)	16,554 (10.68%)	3,253 (2.10%)	3,513 (2.27%)	357 (0.23%)
Able to confide
	Never	19,327 (12.66%)	11,490 (59.45%)	4,010 (20.75%)	2,562 (13.26%)	517 (2.68%)	684 (3.54%)	64 (0.33%)
	Few times a year	16,369 (10.72%)	9,997 (61.07%)	3,357 (20.51%)	2,089 (12.76%)	415 (2.54%)	475 (2.90%)	36 (0.22%)
	Few times a week	32,536 (21.31%)	20,238 (62.20%)	6,395 (19.66%)	4,089 (12.57%)	839 (2.58%)	887 (2.73%)	88 (0.27%)
	Almost daily	84,437 (55.31%)	60,853 (72.07%)	12,826 (15.19%)	7,672 (9.09%)	1,474 (1.75%)	1,448 (1.71%)	164 (0.19%)
	Total	152,669 (100%)	102,578 (67.19%)	26,588 (17.42%)	16,412 (10.75%)	3,245 (2.13%)	3,494 (2.29%)	352 (0.23%)
Pain at any site longer than 3 months
	No	111,694 (71.64%)	77,144 (69.07%)	18,657 (16.70%)	11,149 (9.98%)	2,204 (1.97%)	2,287 (2.05%)	253 (0.23%)
	Yes	44,207 (28.36%)	27,893 (63.10%)	8,390 (18.98%)	5,490 (12.42%)	1,081 (2.45%)	1,244 (2.81%)	109 (0.25%)
	Total	155,901 (100%)	105,037 (67.37%)	27,047 (17.35%)	16,639 (10.67%)	3,285 (2.11%)	3,531 (2.26%)	362 (0.23%)
Bipolar disorder status
	No	154,551 (99.02%)	104,973 (67.92%)	26,770 (17.32%)	16,248 (10.51%)	3,164 (2.05%)	3,340 (2.16%)	56 (0.04%)
	Bipolar 1 or 2	1,529 (0.98%)	358 (23.41%)	381 (24.92%)	451 (29.50%)	132 (8.63%)	204 (13.34%)	3 (0.20%)
	Total	156,080 (100%)	105,331 (67.49%)	27,151 (17.40%)	16,699 (10.70%)	3,296 (2.11%)	3,544 (2.27%)	59 (0.04%)
Depression ever
	No	120,421 (77.15%)	91,971 (76.37%)	17,256 (14.33%)	8,169 (6.78%)	1,622 (1.35%)	1,368 (1.14%)	35 (0.03%)
	Yes	35,659 (22.85%)	13,360 (37.47%)	9,895 (27.75%)	8,530 (23.92%)	1,674 (4.69%)	2,176 (6.10%)	24 (0.07%)
	Total	156,080 (100%)	105,331 (67.49%)	27,151 (17.40%)	16,699 (10.70%)	3,296 (2.11%)	3,544 (2.27%)	59 (0.04%)
Schizophrenia diagnosis
	No	156,135 (99.84%)	105,268 (67.42%)	27,101 (17.36%)	16,651 (10.66%)	3,277 (2.10%)	3,485 (2.23%)	353 (0.23%)
	Yes	249 (0.16%)	63 (25.30%)	50 (20.08%)	48 (19.28%)	19 (7.63%)	59 (23.69%)	10 (4.02%)
	Total	156,384 (100%)	105,331 (67.35%)	27,151 (17.36%)	16,699 (10.68%)	3,296 (2.11%)	3,544 (2.27%)	363 (0.23%)

## Sheet: Column percentages
Supplemental Table 2. Description of the participants of the MHQ1 cohort. Counts expressed as N (%) and continuous variable expressed as median (interquartile range) or mean (standard deviation).
	Category	Total	No lifetime suicidal ideation or behaviour	Passive suicidal ideation	Self-harm ideation	Self-harm behaviour	Suicide attempt	Suicide death
N		156,384 (100.00%)	105,331 (100.00%)	27,151 (100.00%)	16,699 (100.00%)	3,296 (100.00%)	3,544 (100.00%)	363 (100.00%)
Serum 25(OH)D (nmol/L)
		47.80 (33.60-62.90)	48.80 (34.50-63.80)	46.20 (32.20-61.40)	45.50 (31.60-60.70)	43.90 (30.10-59.50)	44.00 (30.40-60.60)	43.90 (28.00-59.90)
Serum vitamin D status
	Deficiency	17,003 (12.04%)	10,411 (10.94%)	3,303 (13.49%)	2,189 (14.57%)	496 (16.66%)	542 (17.15%)	62 (18.96%)
	Insufficiency	59,259 (41.98%)	39,344 (41.32%)	10,568 (43.16%)	6,535 (43.51%)	1,311 (44.04%)	1,359 (42.99%)	142 (43.43%)
	Optimal	64,913 (45.98%)	45,453 (47.74%)	10,612 (43.34%)	6,295 (41.91%)	1,170 (39.30%)	1,260 (39.86%)	123 (37.61%)
Sex
	Female	86,168 (56.33%)	54,734 (53.09%)	16,269 (61.25%)	10,427 (64.03%)	2,271 (70.57%)	2,359 (68.34%)	108 (30.51%)
Age (years)
		63.89 (7.73)	64.66 (7.64)	63.21 (7.66)	61.59 (7.54)	59.50 (7.48)	61.03 (7.47)	62.12 (8.40)
Ethnicity: main groups
	White European	151,055 (97.14%)	101,799 (97.15%)	26,213 (97.19%)	16,156 (97.37%)	3,177 (96.92%)	3,364 (95.65%)	346 (96.11%)
	South Asian	1,073 (0.69%)	759 (0.72%)	178 (0.66%)	82 (0.49%)	21 (0.64%)	29 (0.82%)	4 (1.11%)
	African Caribbean	1,144 (0.74%)	809 (0.77%)	173 (0.64%)	101 (0.61%)	13 (0.40%)	42 (1.19%)	6 (1.67%)
	Chinese	360 (0.23%)	268 (0.26%)	56 (0.21%)	26 (0.16%)	5 (0.15%)	5 (0.14%)
	Mixed or other	1,876 (1.21%)	1,155 (1.10%)	350 (1.30%)	228 (1.37%)	62 (1.89%)	77 (2.19%)	4 (1.11%)
Assessment centre region
	South England/London	62,643 (40.06%)	41,348 (39.26%)	11,377 (41.90%)	6,872 (41.15%)	1,467 (44.51%)	1,455 (41.06%)	124 (34.16%)
	Midlands/Wales	22,788 (14.57%)	15,227 (14.46%)	3,935 (14.49%)	2,507 (15.01%)	479 (14.53%)	575 (16.22%)	65 (17.91%)
	North England	60,480 (38.67%)	41,514 (39.41%)	10,065 (37.07%)	6,289 (37.66%)	1,144 (34.71%)	1,311 (36.99%)	157 (43.25%)
	Scotland	10,473 (6.70%)	7,242 (6.88%)	1,774 (6.53%)	1,031 (6.17%)	206 (6.25%)	203 (5.73%)	17 (4.68%)
Season of blood sample taken
	Spring	44,529 (28.47%)	29,970 (28.45%)	7,746 (28.53%)	4,711 (28.21%)	956 (29.00%)	1,040 (29.35%)	106 (29.20%)
	Summer	41,533 (26.56%)	27,769 (26.36%)	7,285 (26.83%)	4,503 (26.97%)	905 (27.46%)	974 (27.48%)	97 (26.72%)
	Autumn	37,746 (24.14%)	25,445 (24.16%)	6,570 (24.20%)	4,097 (24.53%)	755 (22.91%)	807 (22.77%)	72 (19.83%)
	Winter	32,576 (20.83%)	22,147 (21.03%)	5,550 (20.44%)	3,388 (20.29%)	680 (20.63%)	723 (20.40%)	88 (24.24%)
BMI (kg/m2)
		26.78 (4.56)	26.71 (4.36)	26.79 (4.76)	27.08 (5.07)	26.79 (5.32)	27.54 (5.48)	26.65 (4.73)
Physical activity
	None	2,011 (1.29%)	1,125 (1.07%)	375 (1.38%)	346 (2.07%)	63 (1.91%)	97 (2.74%)	5 (1.38%)
	Low	21,361 (13.66%)	13,957 (13.26%)	3,908 (14.40%)	2,538 (15.20%)	417 (12.67%)	505 (14.25%)	36 (9.94%)
	Moderate	70,381 (45.02%)	47,690 (45.29%)	12,236 (45.08%)	7,359 (44.08%)	1,481 (45.00%)	1,474 (41.59%)	141 (38.95%)
	High	62,578 (40.03%)	42,524 (40.39%)	10,625 (39.14%)	6,451 (38.64%)	1,330 (40.41%)	1,468 (41.42%)	180 (49.72%)
Townsend deprivation index (most (1) - least (5) deprived)
	1	31,399 (20.10%)	18,794 (17.86%)	6,077 (22.41%)	4,198 (25.18%)	960 (29.17%)	1,250 (35.38%)	120 (33.06%)
	2	31,204 (19.98%)	20,377 (19.37%)	5,661 (20.88%)	3,580 (21.47%)	739 (22.46%)	770 (21.79%)	77 (21.21%)
	3	31,184 (19.97%)	21,567 (20.50%)	5,301 (19.55%)	3,081 (18.48%)	600 (18.23%)	581 (16.44%)	54 (14.88%)
	4	30,954 (19.82%)	21,921 (20.83%)	5,056 (18.65%)	2,907 (17.43%)	518 (15.74%)	496 (14.04%)	56 (15.43%)
	5	31,446 (20.13%)	22,554 (21.44%)	5,018 (18.51%)	2,908 (17.44%)	474 (14.40%)	436 (12.34%)	56 (15.43%)
Housing tenure
	Own outright	85,741 (55.11%)	61,513 (58.68%)	14,019 (51.97%)	7,498 (45.14%)	1,211 (36.89%)	1,331 (37.74%)	169 (47.34%)
	Rent/mortgage payment	64,063 (41.18%)	40,405 (38.54%)	11,785 (43.69%)	8,173 (49.21%)	1,803 (54.92%)	1,753 (49.70%)	144 (40.34%)
	Rent from local authority	4,157 (2.67%)	1,980 (1.89%)	834 (3.09%)	705 (4.24%)	209 (6.37%)	387 (10.97%)	42 (11.76%)
	Live in accommodation rent-free	1,023 (0.66%)	608 (0.58%)	211 (0.78%)	138 (0.83%)	30 (0.91%)	34 (0.96%)	2 (0.56%)
	None of the options	598 (0.38%)	325 (0.31%)	126 (0.47%)	95 (0.57%)	30 (0.91%)	22 (0.62%)
Population density
	Urban	142,117 (91.81%)	95,466 (91.46%)	24,749 (92.27%)	15,233 (92.48%)	3,043 (93.57%)	3,287 (93.81%)	339 (93.91%)
Highest level of education attained
	College or University degree	73,389 (50.47%)	48,080 (49.41%)	13,180 (51.76%)	8,568 (54.19%)	1,815 (57.17%)	1,620 (48.62%)	126 (41.72%)
	A levels/AS levels or equivalent	12,907 (8.88%)	8,334 (8.56%)	2,400 (9.42%)	1,486 (9.40%)	313 (9.86%)	345 (10.35%)	29 (9.60%)
	O levels/GCSEs or equivalent	23,711 (16.31%)	16,280 (16.73%)	4,068 (15.97%)	2,285 (14.45%)	437 (13.76%)	574 (17.23%)	67 (22.19%)
	CSEs or equivalent	5,170 (3.56%)	3,436 (3.53%)	904 (3.55%)	540 (3.42%)	120 (3.78%)	149 (4.47%)	21 (6.95%)
	NVQ or HND or HNC or equivalent	6,957 (4.78%)	4,986 (5.12%)	1,104 (4.34%)	610 (3.86%)	85 (2.68%)	155 (4.65%)	17 (5.63%)
	Other professional qualifications e.g.: nursing, teaching	23,271 (16.00%)	16,202 (16.65%)	3,810 (14.96%)	2,323 (14.69%)	405 (12.76%)	489 (14.68%)	42 (13.91%)
Employment status
	Employed/student	75,519 (48.29%)	49,453 (46.95%)	13,599 (50.09%)	8,832 (52.89%)	1,854 (56.25%)	1,635 (46.13%)	146 (40.22%)
	Retired	56,068 (35.85%)	41,205 (39.12%)	8,844 (32.57%)	4,405 (26.38%)	648 (19.66%)	862 (24.32%)	104 (28.65%)
	Unemployed for various reasons	10,860 (6.94%)	6,012 (5.71%)	2,145 (7.90%)	1,606 (9.62%)	425 (12.89%)	612 (17.27%)	60 (16.53%)
	Other	13,937 (8.91%)	8,661 (8.22%)	2,563 (9.44%)	1,856 (11.11%)	369 (11.20%)	435 (12.27%)	53 (14.60%)
Sexually abused as a child
	No	140,774 (91.22%)	97,885 (93.77%)	23,917 (89.33%)	13,808 (84.08%)	2,544 (78.83%)	2,582 (74.78%)	38 (77.55%)
	Rarely/Sometimes	12,096 (7.84%)	6,002 (5.75%)	2,578 (9.63%)	2,281 (13.89%)	567 (17.57%)	660 (19.11%)	8 (16.33%)
	Often/Very often	1,446 (0.94%)	505 (0.48%)	278 (1.04%)	333 (2.03%)	116 (3.59%)	211 (6.11%)	3 (6.12%)
Physically abused as a child
	No	126,216 (81.03%)	89,165 (84.81%)	21,008 (77.49%)	11,767 (70.70%)	2,146 (65.43%)	2,096 (59.33%)	34 (69.39%)
	Rarely/Sometimes	27,231 (17.48%)	15,176 (14.43%)	5,557 (20.50%)	4,356 (26.17%)	988 (30.12%)	1,141 (32.30%)	13 (26.53%)
	Often/Very often	2,308 (1.48%)	799 (0.76%)	544 (2.01%)	521 (3.13%)	146 (4.45%)	296 (8.38%)	2 (4.08%)
Emotionally abused as a child
	No	131,392 (84.40%)	94,672 (90.05%)	21,083 (77.94%)	11,625 (69.88%)	2,027 (61.78%)	1,952 (55.33%)	33 (68.75%)
	Rarely/Sometimes	19,757 (12.69%)	9,158 (8.71%)	4,872 (18.01%)	3,827 (23.01%)	905 (27.58%)	986 (27.95%)	9 (18.75%)
	Often/Very often	4,520 (2.90%)	1,297 (1.23%)	1,095 (4.05%)	1,183 (7.11%)	349 (10.64%)	590 (16.72%)	6 (12.50%)
Adopted as a child
	Yes	2,038 (1.30%)	1,230 (1.17%)	369 (1.36%)	252 (1.51%)	66 (2.01%)	115 (3.26%)	6 (1.67%)
Risk taking behaviour
	Yes	40,671 (26.88%)	26,110 (25.55%)	7,216 (27.59%)	4,931 (30.68%)	1,032 (32.74%)	1,262 (37.11%)	120 (34.29%)
Neuroticism
		3.86 (3.16)	3.14 (2.82)	5.14 (3.20)	5.58 (3.34)	5.86 (3.44)	6.29 (3.45)	5.47 (3.71)
Family/friend visits
	Never/no friends outside household	1,957 (1.26%)	1,000 (0.96%)	400 (1.49%)	346 (2.09%)	84 (2.58%)	109 (3.10%)	18 (5.04%)
	Few times a year	34,804 (22.46%)	22,420 (21.48%)	6,356 (23.64%)	4,233 (25.57%)	875 (26.90%)	850 (24.20%)	70 (19.61%)
	Few times a week	103,443 (66.75%)	70,775 (67.79%)	17,641 (65.62%)	10,547 (63.71%)	2,014 (61.91%)	2,232 (63.54%)	234 (65.55%)
	Almost daily	14,757 (9.52%)	10,204 (9.77%)	2,488 (9.25%)	1,428 (8.63%)	280 (8.61%)	322 (9.17%)	35 (9.80%)
Able to confide
	Never	19,327 (12.66%)	11,490 (11.20%)	4,010 (15.08%)	2,562 (15.61%)	517 (15.93%)	684 (19.58%)	64 (18.18%)
	Few times a year	16,369 (10.72%)	9,997 (9.75%)	3,357 (12.63%)	2,089 (12.73%)	415 (12.79%)	475 (13.59%)	36 (10.23%)
	Few times a week	32,536 (21.31%)	20,238 (19.73%)	6,395 (24.05%)	4,089 (24.91%)	839 (25.86%)	887 (25.39%)	88 (25.00%)
	Almost daily	84,437 (55.31%)	60,853 (59.32%)	12,826 (48.24%)	7,672 (46.75%)	1,474 (45.42%)	1,448 (41.44%)	164 (46.59%)
Pain at any site longer than 3 months
	Yes	44,207 (28.36%)	27,893 (26.56%)	8,390 (31.02%)	5,490 (32.99%)	1,081 (32.91%)	1,244 (35.23%)	109 (30.11%)
Bipolar disorder status
	Bipolar 1 or 2	1,529 (0.98%)	358 (0.34%)	381 (1.40%)	451 (2.70%)	132 (4.00%)	204 (5.76%)	3 (5.08%)
Depression ever
	Yes	35,659 (22.85%)	13,360 (12.68%)	9,895 (36.44%)	8,530 (51.08%)	1,674 (50.79%)	2,176 (61.40%)	24 (40.68%)
Schizophrenia diagnosis
	Yes	249 (0.16%)	63 (0.06%)	50 (0.18%)	48 (0.29%)	19 (0.58%)	59 (1.66%)	10 (2.75%)
Abbreviations: MHQ1: ‘Thoughts and Feelings’ (Mental Health Questionnaire 1; 2016)
